# Supplementary material for: Utilisation and costs of mental health-related service use among adolescents
Source: PubMed Central journal article supplement (PMC9462733; doi:10.1371/journal.pone.0273628), 2022-09-09

**S1 Fig. Flow chart of Brazilian High-Risk Cohort participants included in the mental-health related service use study.**

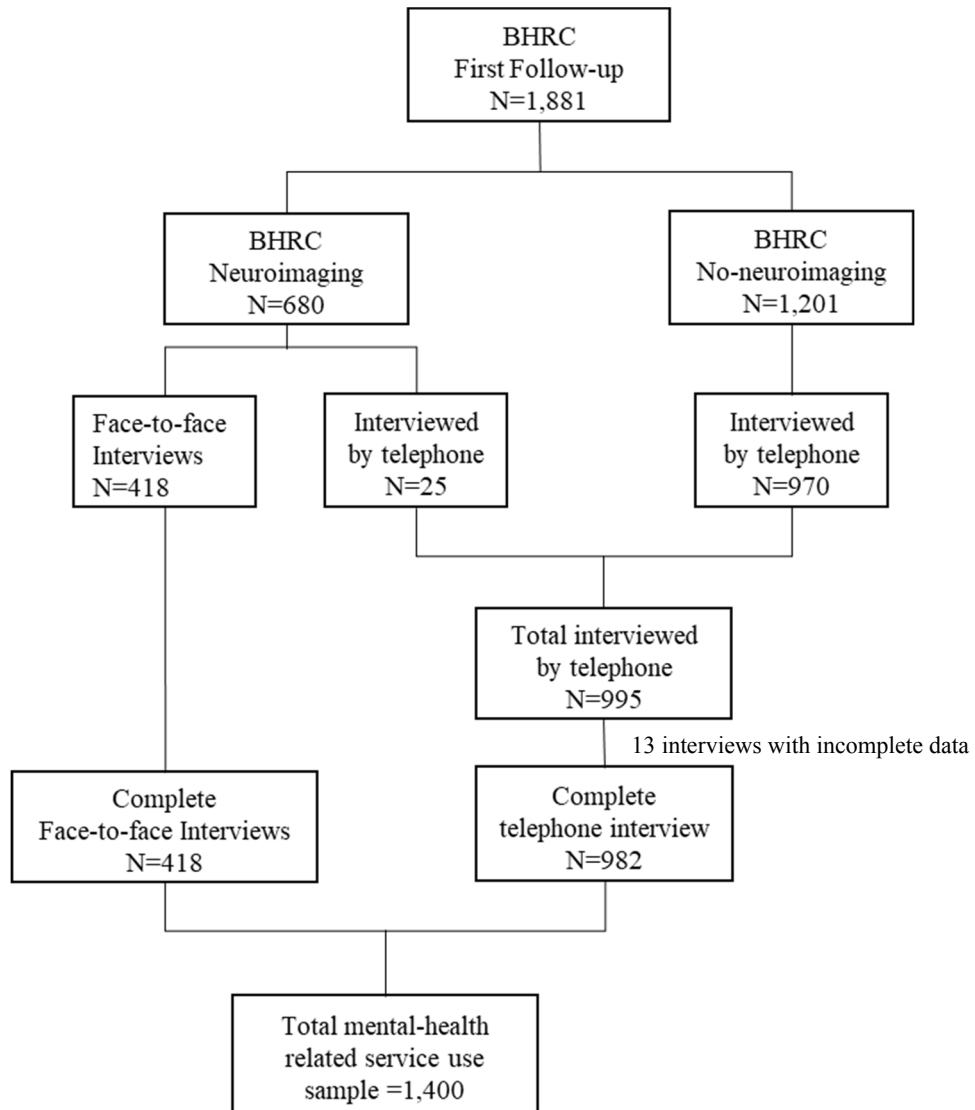

Supplement: pone.0273628.s001.pdf [file pone.0273628.s001.pdf]
