# Supplementary material for: Utilisation and costs of mental health-related service use among adolescents
Source: PubMed Central journal article supplement (PMC9462733; doi:10.1371/journal.pone.0273628), 2022-09-09
Supplement: pone.0273628.s003.pdf [file pone.0273628.s003.pdf]

**S2 Table. Bivariate analysis: Predictors of 12-month mental health service utilisation.**

| Predictors                                       | Any service use                  |                  | Health service use               |                  | Education service use             |                  | Social care and criminal justice service use |              |
|--------------------------------------------------|----------------------------------|------------------|----------------------------------|------------------|-----------------------------------|------------------|----------------------------------------------|--------------|
|                                                  | OR<br>(95%CI)                    | P                | OR<br>(95%CI)                    | p                | OR<br>(95%CI)                     | p                | OR<br>(95%CI)                                | p            |
| <b><i>Sociodemographic characteristics</i></b>   |                                  |                  |                                  |                  |                                   |                  |                                              |              |
| Female gender                                    | 0.82<br>0.57-1.17                | 0.271            | 0.90<br>0.62-1.31                | 0.583            | 0.47<br>0.18-1.19                 | 0.111            | 1.34<br>0.53-3.40                            | 0.535        |
| Age                                              | 0.99<br>0.91-1.09                | 0.892            | 0.97<br>0.88-1.06                | 0.498            | 0.97<br>0.79-1.20                 | 0.770            | 1.22<br>0.96-1.55                            | 0.101        |
| SEG                                              | (Reference)                      |                  |                                  |                  |                                   |                  |                                              |              |
| High                                             |                                  |                  |                                  |                  |                                   |                  |                                              |              |
| Low                                              | 1.16<br>0.81-1.67                | 0.408            | 1.00<br>0.67-1.45                | 0.979            | 2.39<br>0.88-6.47                 | 0.087            | 3.32<br>0.96-11.51                           | 0.059        |
| Ethnicity                                        | (Reference)                      |                  |                                  |                  |                                   |                  |                                              |              |
| White                                            |                                  |                  |                                  |                  |                                   |                  |                                              |              |
| Non-White                                        | 1.00<br>0.70-1.41                | 0.981            | 0.84<br>0.58-1.23                | 0.371            | 0.45<br>0.18-1.16                 | 0.098            | 2.64<br>0.98-7.06                            | 0.054        |
| <b><i>Guardian characteristics</i></b>           |                                  |                  |                                  |                  |                                   |                  |                                              |              |
| Mother's Education                               | (Reference)                      |                  |                                  |                  |                                   |                  |                                              |              |
| No education/basic                               |                                  |                  |                                  |                  |                                   |                  |                                              |              |
| Secondary                                        | 1.27<br>0.88-1.85                | 0.205            | 1.40<br>0.94-2.01                | 0.100            | 1.86<br>0.744-6.9                 | 0.190            | 0.45<br>0.15-1.29                            | 0.136        |
| University                                       | 1.34<br>0.76-2.39                | 0.315            | 1.52<br>0.84-2.78                | 0.168            | 1.21<br>0.25-5.88                 | 0.815            | 0.76<br>0.17-3.48                            | 0.728        |
| Lower parental stigma-RIBS                       | <b>1.08</b><br><b>1.02-1.15</b>  | <b>0.010</b>     | <b>1.07</b><br><b>1.00-1.14</b>  | <b>0.038</b>     | 1.20<br>0.99-1.46                 | 0.060            | 1.04<br>0.89-1.21                            | 0.619        |
| <b><i>Clinical characteristics</i></b>           |                                  |                  |                                  |                  |                                   |                  |                                              |              |
| <b><i>Psychiatric diagnosis trajectories</i></b> |                                  |                  |                                  |                  |                                   |                  |                                              |              |
| No diagnosis                                     | (Reference)                      |                  |                                  |                  |                                   |                  |                                              |              |
| Incident                                         | <b>4.20</b><br><b>2.57-6.86</b>  | <b>&lt;0.001</b> | <b>4.49</b><br><b>2.67-7.55</b>  | <b>&lt;0.001</b> | <b>4.95</b><br><b>1.23-20.00</b>  | <b>0.025</b>     | <b>3.96</b><br><b>1.05-14.89</b>             | <b>0.042</b> |
| Remittent                                        | <b>2.76</b><br><b>1.66-4.58</b>  | <b>&lt;0.001</b> | <b>2.77</b><br><b>1.61-4.79</b>  | <b>&lt;0.001</b> | <b>6.21</b><br><b>1.73-22.21</b>  | <b>0.005</b>     | 2.45<br>0.58-10.32                           | 0.223        |
| Persistent                                       | <b>7.22</b><br><b>4.50-11.58</b> | <b>&lt;0.001</b> | <b>7.85</b><br><b>4.77-12.90</b> | <b>&lt;0.001</b> | <b>13.77</b><br><b>4.19-45.33</b> | <b>&lt;0.001</b> | <b>7.18</b><br><b>2.16-23.85</b>             | <b>0.001</b> |
| SDQ impact score                                 | <b>1.49</b><br><b>1.36-1.62</b>  | <b>&lt;0.001</b> | <b>1.51</b><br><b>1.38-1.65</b>  | <b>&lt;0.001</b> | <b>1.55</b><br><b>1.35-1.78</b>   | <b>&lt;0.001</b> | <b>1.31</b><br><b>1.01-1.57</b>              | <b>0.003</b> |
| <b><i>Interview method</i></b>                   |                                  |                  |                                  |                  |                                   |                  |                                              |              |
| In-person                                        | (Reference)                      |                  |                                  |                  |                                   |                  |                                              |              |
| Telephone                                        | <b>0.43</b><br><b>0.30-0.60</b>  | <b>&lt;0.001</b> | <b>0.40</b><br><b>0.28-0.58</b>  | <b>&lt;0.001</b> | 0.55<br>0.24-1.26                 | 0.156            | 0.42<br>0.17-1.07                            | 0.068        |
