# Supplementary material for: Utilisation and costs of mental health-related service use among adolescents
Source: PubMed Central journal article supplement (PMC9462733; doi:10.1371/journal.pone.0273628), 2022-09-09
Supplement: pone.0273628.s004.pdf [file pone.0273628.s004.pdf]

**S3 Table. Bivariate analysis: Predictors of cost of mental health service use in the last 12 months**

| Predictors                                       | Total cost<br>N=133                |                                    | Health services<br>costs N=115  |                     | Education services<br>costs N=22 |                                                | Social care and<br>criminal justice<br>services costs<br>N=14 |                     |       |
|--------------------------------------------------|------------------------------------|------------------------------------|---------------------------------|---------------------|----------------------------------|------------------------------------------------|---------------------------------------------------------------|---------------------|-------|
|                                                  | $\beta$<br>(95%CI)                 | P                                  | $\beta$<br>(95%CI)              | P                   | $\beta$<br>(95%CI)               | p                                              | $\beta$<br>(95%CI)                                            | p                   |       |
| <b><i>Sociodemographic Characteristics</i></b>   |                                    |                                    |                                 |                     |                                  |                                                |                                                               |                     |       |
| Female gender                                    | -0.02<br>-0.64-0.59                | 0.940                              | 0.18<br>-0.47-0.83              | 0.596               | -0.04<br>-0.24-0.16              | 0.663                                          | 1.07<br>-0.46-2.60                                            | 0.170               |       |
| Age                                              | 0.01<br>-0.14-0.16                 | 0.899                              | 0.06<br>-0.11-0.22              | 0.524               | 0.02<br>-0.063-0.0               | 0.432                                          | <b>-0.40</b><br><b>-0.73- -0.07</b>                           | <b>0.019</b>        |       |
| SEG                                              | High<br>Low                        | Reference<br>0.30<br>-0.29-0.88    | 0.323                           | 0.18<br>-0.46-0.83  | 0.577                            | <b>-0.18</b><br><b>-0.35-</b><br><b>-0.003</b> | <b>0.047</b><br>3.71<br>-0.62-8.05                            | 0.093               |       |
| Ethnicity                                        | White<br>Non-White                 | (Reference)<br>-0.48<br>-1.07-0.11 | 0.108                           | 0.03<br>-0.65-0.71  | 0.927                            | -0.08<br>-0.27-0.12                            | 0.429                                                         | -1.35<br>-2.74-0.04 | 0.058 |
| <b><i>Guardian characteristics</i></b>           |                                    |                                    |                                 |                     |                                  |                                                |                                                               |                     |       |
| Mother's<br>Education                            | No<br>education/basic<br>Secondary | (Reference)<br>0.12<br>-0.55-0.78  | 0.736                           | -0.01<br>-0.75-0.74 | 0.990                            | -0.03<br>-0.13-0.08                            | 0.643                                                         | -0.82<br>-3.32-1.69 | 0.523 |
|                                                  | University                         | 0.11<br>-0.91-1.13                 | 0.827                           | 0.03<br>-1.05-1.10  | 0.960                            | <b>0.42</b><br><b>-0.24-0.60</b>               | <b>&lt;0.00</b><br><b>1</b>                                   | -3.85<br>-7.85-0.14 | 0.059 |
| Lower parental<br>stigma-RIBS                    |                                    | <b>0.12</b><br><b>0.02-0.22</b>    | <b>0.018</b>                    | 0.06<br>-0.05-0.17  | 0.250                            | -0.01<br>-0.06-0.04                            | 0.697                                                         | 0.21<br>-0.06-0.48  | 0.130 |
| <b><i>Clinical characteristics</i></b>           |                                    |                                    |                                 |                     |                                  |                                                |                                                               |                     |       |
| <b><i>Psychiatric diagnosis trajectories</i></b> |                                    |                                    |                                 |                     |                                  |                                                |                                                               |                     |       |
| No diagnosis                                     | (Reference)                        |                                    |                                 |                     |                                  |                                                |                                                               |                     |       |
| Incident <sup>3</sup>                            | 0.58<br>-0.17-1.32                 | 0.128                              | 0.54<br>-0.31-1.38              | 0.212               | -0.02<br>-0.28-0.24              | 0.883                                          | 1.23<br>-0.27-2.73                                            | 0.109               |       |
| Remittent                                        | 0.68<br>-0.12-1.48                 | 0.096                              | 0.40<br>-0.51-1.32              | 0.390               | 0.16<br>-0.08-0.40               | 0.181                                          | -0.35<br>-1.97-1.27                                           | 0.671               |       |
| Persistent                                       | 0.66<br>-0.07-1.38                 | 0.077                              | 0.54<br>-0.26-1.35              | 0.187               | -0.01<br>-0.23-0.22              | 0.954                                          | <b>-2.59</b><br><b>-4.21-0.97</b>                             | <b>0.002</b>        |       |
| SDQ impact<br>score                              | <b>0.22</b><br><b>0.09-0.35</b>    | <b>0.001</b>                       | <b>0.18</b><br><b>0.06-0.30</b> | <b>0.004</b>        | 0.01<br>-0.03-0.04               | 0.747                                          | 0.23<br>-0.47-0.93                                            | 0.516               |       |
| <b><i>Interview method</i></b>                   |                                    |                                    |                                 |                     |                                  |                                                |                                                               |                     |       |
| In-person                                        | Reference                          |                                    |                                 |                     |                                  |                                                |                                                               |                     |       |
| Telephone                                        | -0.01<br>-0.60-0.58                | 0.978                              | -0.32<br>-0.98-0.35             | 0.348               | 0.10<br>-0.07-0.27               | 0.231                                          | 1.27<br>-0.49-3.02                                            | 0.156               |       |
