# Supplementary material for: Utilisation and costs of mental health-related service use among adolescents
Source: PubMed Central journal article supplement (PMC9462733; doi:10.1371/journal.pone.0273628), 2022-09-09
Supplement: pone.0273628.s005.pdf [file pone.0273628.s005.pdf]

**S4 Table. Logistic regression models: 12-month mental health service utilisation predicted by psychiatric diagnosis trajectories.**

| Predictor                                 | Any service use                 |                  | Health service use               |                  | Education service use            |                  | Social care and criminal justice service use |              |
|-------------------------------------------|---------------------------------|------------------|----------------------------------|------------------|----------------------------------|------------------|----------------------------------------------|--------------|
|                                           | OR<br>95%CI                     | P                | OR<br>95%CI                      | p                | OR<br>95%CI                      | p                | OR<br>95%CI                                  | p            |
| <b>Psychiatric diagnosis trajectories</b> |                                 |                  |                                  |                  |                                  |                  |                                              |              |
| No diagnosis                              | Reference                       |                  |                                  |                  |                                  |                  |                                              |              |
| Incident                                  | <b>3.73</b><br><b>2.24-6.20</b> | <b>&lt;0.001</b> | <b>3.91</b><br><b>2.28-6.70</b>  | <b>&lt;0.001</b> | <b>4.70</b><br><b>1.13-19.57</b> | <b>0.033</b>     | 3.22<br>0.81-12.83                           | 0.097        |
| Remittent                                 | <b>2.51</b><br><b>1.49-4.22</b> | <b>0.001</b>     | <b>2.60</b><br><b>1.49-4.56</b>  | <b>0.001</b>     | <b>4.73</b><br><b>1.29-17.34</b> | <b>0.019</b>     | 2.14<br>0.49-9.36                            | 0.311        |
| Persistent                                | <b>6.00</b><br><b>3.67-9.81</b> | <b>&lt;0.001</b> | <b>6.76</b><br><b>4.04-11.30</b> | <b>&lt;0.001</b> | <b>9.98</b><br><b>2.85-34.98</b> | <b>&lt;0.001</b> | <b>5.80</b><br><b>1.66-20.28</b>             | <b>0.006</b> |
| Test statistics                           |                                 |                  |                                  |                  |                                  |                  |                                              |              |
| x <sup>2</sup>                            | 88.83                           |                  | 87.98                            |                  | 36.03                            |                  | 24.69                                        |              |
| p value                                   | <0.001                          |                  | <0.001                           |                  | 0.0002                           |                  | 0.010                                        |              |
| Pseudo R <sup>2</sup>                     | 0.10                            |                  | 0.11                             |                  | 0.16                             |                  | 0.13                                         |              |

Models adjusted by gender, age, SEG, ethnicity, mother's education, city and method of interview.
