# Supplementary material for: Utilisation and costs of mental health-related service use among adolescents
Source: PubMed Central journal article supplement (PMC9462733; doi:10.1371/journal.pone.0273628), 2022-09-09
Supplement: pone.0273628.s006.pdf [file pone.0273628.s006.pdf]

**S5 Table. Logistic regression models: 12-month mental health service utilisation predicted by impact of behavioural and emotional difficulties on child' life.**

| Predictor               | Any service use                 |                  | Health service use              |                  | Education service use           |                  | Social care and criminal justice service use |              |
|-------------------------|---------------------------------|------------------|---------------------------------|------------------|---------------------------------|------------------|----------------------------------------------|--------------|
|                         | OR<br>(95%CI)                   | P                | OR<br>(95%CI)                   | p                | OR<br>(95%CI)                   | p                | OR<br>(95%CI)                                | p            |
| <b>SDQ impact score</b> | <b>1.45</b><br><b>1.33-1.58</b> | <b>&lt;0.001</b> | <b>1.46</b><br><b>1.33-1.60</b> | <b>&lt;0.001</b> | <b>1.58</b><br><b>1.35-1.86</b> | <b>&lt;0.001</b> | <b>1.34</b><br><b>1.10-1.64</b>              | <b>0.004</b> |
| Test statistics         |                                 |                  |                                 |                  |                                 |                  |                                              |              |
| x <sup>2</sup>          | 95.61                           |                  | 93.81                           |                  | 48.32                           |                  | 23.40                                        |              |
| p value                 | <0.001                          |                  | <0.001                          |                  | <0.001                          |                  | 0.005                                        |              |
| Pseudo R <sup>2</sup>   | 0.11                            |                  | 0.11                            |                  | 0.21                            |                  | 0.12                                         |              |

Models adjusted by gender, age, SEG, ethnicity, mother's education, city and method of interview.
