# Supplementary material for: Utilisation and costs of mental health-related service use among adolescents
Source: PubMed Central journal article supplement (PMC9462733; doi:10.1371/journal.pone.0273628), 2022-09-09
Supplement: pone.0273628.s007.pdf [file pone.0273628.s007.pdf]

**S6 Table. Logistic regression models: 12-month mental health service utilisation predicted by parental stigma.**

| Predictor                         | Any service use                 |              | Health service use              |              | Education service use           |              | Social care and criminal justice service use |       |
|-----------------------------------|---------------------------------|--------------|---------------------------------|--------------|---------------------------------|--------------|----------------------------------------------|-------|
|                                   | OR (95%CI)                      | p            | OR (95%CI)                      | p            | OR (95%CI)                      | p            | OR (95%CI)                                   | p     |
| <b>Lower parental stigma-RIBS</b> | <b>1.12</b><br><b>1.05-1.19</b> | <b>0.001</b> | <b>1.10</b><br><b>1.03-1.18</b> | <b>0.004</b> | <b>1.22</b><br><b>1.00-1.50</b> | <b>0.047</b> | 1.08<br>0.93-1.26                            | 0.303 |
| Test statistics                   |                                 |              |                                 |              |                                 |              |                                              |       |
| x <sup>2</sup>                    | 43.74                           |              | 38.16                           |              | 25.90                           |              | 18.06                                        |       |
| p value                           | <0.001                          |              | <0.001                          |              | 0.002                           |              | 0.035                                        |       |
| Pseudo R <sup>2</sup>             | 0.05                            |              | 0.05                            |              | 0.12                            |              | 0.09                                         |       |

Models adjusted by gender, age, SEG, ethnicity, mother's education, city and method of interview
