# Supplementary material for: Utilisation and costs of mental health-related service use among adolescents
Source: PubMed Central journal article supplement (PMC9462733; doi:10.1371/journal.pone.0273628), 2022-09-09
Supplement: pone.0273628.s008.pdf [file pone.0273628.s008.pdf]

**S7 Table. Generalised linear models: cost of 12-month mental health service utilization predicted by psychiatric diagnosis trajectories.**

| Predictor                                 | Any service costs  |       | Health service costs |       | Education service costs |       | Social care and criminal justice service costs |              |
|-------------------------------------------|--------------------|-------|----------------------|-------|-------------------------|-------|------------------------------------------------|--------------|
|                                           | $\beta$<br>95%CI   | p     | $\beta$<br>95%CI     | p     | $\beta$<br>95%CI        | p     | $\beta$<br>95%CI                               | p            |
| <b>Psychiatric diagnosis trajectories</b> |                    |       |                      |       |                         |       |                                                |              |
| No diagnosis                              | Reference          |       |                      |       |                         |       |                                                |              |
| Incident                                  | 0.36<br>-0.45-1.17 | 0.385 | 0.54<br>-0.37-1.44   | 0.245 | 0.08<br>-1.12-0.28      | 0.416 | <b>-19.78</b><br><b>-35.40- -4.16</b>          | <b>0.013</b> |
| Remittent                                 | 0.66<br>-0.45-1.33 | 0.145 | 0.41<br>-0.58-1.40   | 0.418 | 0.0004<br>-0.19-0.19    | 0.997 | <b>-2.65</b><br><b>-5.26- -0.04</b>            | <b>0.047</b> |
| Persistent                                | 0.50<br>-0.36-1.36 | 0.252 | 0.38<br>-0.49-1.25   | 0.389 | 0.17<br>-0.01-0.40      | 0.141 | <b>-15.13</b><br><b>-24.64- -5.62</b>          | <b>0.002</b> |
| Test statistics                           |                    |       |                      |       |                         |       |                                                |              |
| AIC                                       | 17.21741           |       | 16.35117             |       | 20.08232                |       | 15.64249                                       |              |
| BIC                                       | -327.5553          |       | -301.5434            |       | -30.76184               |       | -2.758111                                      |              |
| R <sup>2</sup>                            | 0.09               |       | 0.07                 |       | 0.77                    |       | 0.86                                           |              |

Models adjusted by gender, age, SEG, ethnicity, mother's education, city and method of interview.
