# Supplementary material for: Utilisation and costs of mental health-related service use among adolescents
Source: PubMed Central journal article supplement (PMC9462733; doi:10.1371/journal.pone.0273628), 2022-09-09
Supplement: pone.0273628.s009.pdf [file pone.0273628.s009.pdf]

**S8 Table. Generalised linear models: cost of 12-month mental health service utilisation predicted by impact of behavioural and emotional difficulties on child' life.**

| Predictor               | Any service use                 |                  | Health service use              |              | Education service use |       | Social care and criminal justice service use |       |
|-------------------------|---------------------------------|------------------|---------------------------------|--------------|-----------------------|-------|----------------------------------------------|-------|
|                         | $\beta$<br>(95%CI)              | p                | $\beta$<br>(95%CI)              | p            | $\beta$<br>(95%CI)    | p     | $\beta$<br>(95%CI)                           | p     |
| <b>SDQ impact score</b> | <b>0.24</b><br><b>0.12-0.37</b> | <b>&lt;0.001</b> | <b>0.17</b><br><b>0.04-0.30</b> | <b>0.011</b> | 0.01<br>-0.01-0.04    | 0.213 | 0.26<br>-0.69-1.21                           | 0.588 |
| Test statistics         |                                 |                  |                                 |              |                       |       |                                              |       |
| AIC                     | 17.00148                        |                  | 16.2201                         |              | 19.90144              |       | 16.54766                                     |       |
| BIC                     | -361.593                        |                  | -322.1063                       |              | -36.9233              |       | 8.636024                                     |       |
| R <sup>2</sup>          | 0.18                            |                  | 0.12                            |              | 0.74                  |       | 0.41                                         |       |

Models adjusted by gender, age, SEG, ethnicity, mother's education, city and method of interview.
