# Supplementary material for: Utilisation and costs of mental health-related service use among adolescents
Source: PubMed Central journal article supplement (PMC9462733; doi:10.1371/journal.pone.0273628), 2022-09-09
Supplement: pone.0273628.s010.pdf [file pone.0273628.s010.pdf]

**S9 Table. Generalised linear models: cost of 12-month mental health service utilisation predicted by parental stigma.**

| Predictor                         | Any service costs               |              | Health service costs |       | Education service costs |       | Social care and criminal justice service costs |       |
|-----------------------------------|---------------------------------|--------------|----------------------|-------|-------------------------|-------|------------------------------------------------|-------|
|                                   | $\beta$<br>(95%CI)              | p            | $\beta$ (95%CI)      | p     | $\beta$<br>(95%CI)      | p     | $\beta$<br>(95%CI)                             | p     |
| <b>Lower parental stigma-RIBS</b> | <b>0.13</b><br><b>0.02-0.24</b> | <b>0.019</b> | 0.08<br>-0.04-0.20   | 0.207 | 0.02<br>-0.03-0.07      | 0.421 | 0.35<br>-0.08-0.79                             | 0.113 |
| Test statistics                   |                                 |              |                      |       |                         |       |                                                |       |
| AIC                               | 17.15546                        |              | 16.31905             |       | 19.90198                |       | 16.23348                                       |       |
| BIC                               | -341.422                        |              | -310.7278            |       | -36.9114                |       | 4.237509                                       |       |
| R <sup>2</sup>                    | 0.10                            |              | 0.07                 |       | 0.72                    |       | 0.53                                           |       |

Models adjusted by gender, age, SEG, ethnicity, mother's education, city and method of interview.
