# Supplementary material for: Utilisation and costs of mental health-related service use among adolescents
Source: PubMed Central journal article supplement (PMC9462733; doi:10.1371/journal.pone.0273628), 2022-09-09
Supplement: pone.0273628.s011.pdf [file pone.0273628.s011.pdf]

**S10 Table. Generalised linear models: cost of 12-month mental health service utilisation predicted by broad diagnosis categories.**

| <b>Broad diagnosis categories</b> | <b><math>\beta</math></b> | <b>95%CI</b> |        | <b>p</b> |
|-----------------------------------|---------------------------|--------------|--------|----------|
| <b>No diagnosis</b>               | Reference                 |              |        |          |
| <b>Distress and Externalizing</b> | -0,90                     | -2,70        | - 0,89 | 0,325    |
| <b>Fear and Distress</b>          | 0,22                      | -0,77        | - 1,21 | 0,666    |
| <b>Fear and Externalizing</b>     | 0,61                      | -0,80        | - 2,02 | 0,396    |
| <b>Full Comorbid</b>              | 0,53                      | -1,27        | - 2,32 | 0,566    |
| <b>Only Distress</b>              | 0,60                      | -0,43        | - 1,63 | 0,252    |
| <b>Only Externalizing</b>         | 0,17                      | -0,57        | - 0,90 | 0,658    |
| <b>Only Fear</b>                  | 0,62                      | -0,41        | - 1,65 | 0,235    |
