# Supplementary material for: Utilisation and costs of mental health-related service use among adolescents
Source: PubMed Central journal article supplement (PMC9462733; doi:10.1371/journal.pone.0273628), 2022-09-09
Supplement: pone.0273628.s013.pdf [file pone.0273628.s013.pdf]

Utilisation and costs of mental health-related service use among adolescents

--Manuscript Draft--

|                               |                                                                                                                                                                                                                                                                                                                                                                                                                                                                                                                                                                                                                                                                                                                                                                                                                                                                                                                                                                                                                                                                                                                                                                                                                                                                                                                                                                                                                                                                                                                                                                                                                                                                                                                                                                                                                                                                                                                                                                                |
|-------------------------------|--------------------------------------------------------------------------------------------------------------------------------------------------------------------------------------------------------------------------------------------------------------------------------------------------------------------------------------------------------------------------------------------------------------------------------------------------------------------------------------------------------------------------------------------------------------------------------------------------------------------------------------------------------------------------------------------------------------------------------------------------------------------------------------------------------------------------------------------------------------------------------------------------------------------------------------------------------------------------------------------------------------------------------------------------------------------------------------------------------------------------------------------------------------------------------------------------------------------------------------------------------------------------------------------------------------------------------------------------------------------------------------------------------------------------------------------------------------------------------------------------------------------------------------------------------------------------------------------------------------------------------------------------------------------------------------------------------------------------------------------------------------------------------------------------------------------------------------------------------------------------------------------------------------------------------------------------------------------------------|
| <b>Manuscript Number:</b>     | PONE-D-21-10663R1                                                                                                                                                                                                                                                                                                                                                                                                                                                                                                                                                                                                                                                                                                                                                                                                                                                                                                                                                                                                                                                                                                                                                                                                                                                                                                                                                                                                                                                                                                                                                                                                                                                                                                                                                                                                                                                                                                                                                              |
| <b>Article Type:</b>          | Research Article                                                                                                                                                                                                                                                                                                                                                                                                                                                                                                                                                                                                                                                                                                                                                                                                                                                                                                                                                                                                                                                                                                                                                                                                                                                                                                                                                                                                                                                                                                                                                                                                                                                                                                                                                                                                                                                                                                                                                               |
| <b>Full Title:</b>            | Utilisation and costs of mental health-related service use among adolescents                                                                                                                                                                                                                                                                                                                                                                                                                                                                                                                                                                                                                                                                                                                                                                                                                                                                                                                                                                                                                                                                                                                                                                                                                                                                                                                                                                                                                                                                                                                                                                                                                                                                                                                                                                                                                                                                                                   |
| <b>Short Title:</b>           | Adolescent mental health service use and costs                                                                                                                                                                                                                                                                                                                                                                                                                                                                                                                                                                                                                                                                                                                                                                                                                                                                                                                                                                                                                                                                                                                                                                                                                                                                                                                                                                                                                                                                                                                                                                                                                                                                                                                                                                                                                                                                                                                                 |
| <b>Corresponding Author:</b>  | Sara Evans-Lacko<br>London School of Economics<br>London, UNITED KINGDOM                                                                                                                                                                                                                                                                                                                                                                                                                                                                                                                                                                                                                                                                                                                                                                                                                                                                                                                                                                                                                                                                                                                                                                                                                                                                                                                                                                                                                                                                                                                                                                                                                                                                                                                                                                                                                                                                                                       |
| <b>Keywords:</b>              | Service Utilisation, Mental Health, Adolescence, Health Economics                                                                                                                                                                                                                                                                                                                                                                                                                                                                                                                                                                                                                                                                                                                                                                                                                                                                                                                                                                                                                                                                                                                                                                                                                                                                                                                                                                                                                                                                                                                                                                                                                                                                                                                                                                                                                                                                                                              |
| <b>Abstract:</b>              | <p><b>Background:</b> The high burden of care for adolescents with mental health disorders represents a challenge to the public sector, especially in low and middle-income countries. We aimed to estimate the costs to the public purse of health, education, criminal justice and social care service use associated with psychiatric disorders among adolescents in Brazil; and to examine whether the trajectory of psychopathology and its impact on daily life, and parental stigma towards mental illness may be associated with service utilisation and costs.</p> <p><b>Methods:</b> Data on reported service use among adolescents from a prospective community cohort (n=1,400) were combined with Brazilian unit costs. Logistic regression and generalised linear models were used to examine predictors of service use and associated costs, respectively.</p> <p><b>Results:</b> Twenty-two percent of those who presented with a psychiatric disorder used some type of service for their mental health in the previous twelve months. Higher odds of service use were associated with having a diagnosed mental disorder (either incident [OR=2.49, 95%CI=1.44-4.30, p=0.001], remittent [OR=2.16, 95%CI=1.27-3.69, p=0.005] or persistent [OR=3.01, 95%CI=1.69-5.36, p&lt;0.001]), higher impact of symptoms on adolescent's life (OR=1.32, 95%CI=1.19-1.47, p&lt;0.001) and lower parental stigma toward mental illness (OR=1.12, 95%CI=1.05-1.20, p=0.001). Average annual cost of service use was 527.14 USD (s.d.= 908.10). Higher cost was predicted by higher disorder impact (b=0.25, 95%CI=0.12-0.39, p&lt;0.001), lower parental stigma (b=0.12, 95%CI=0.02-0.23, p=0.020) and white ethnicity (b=0.55, 95%CI=0.04-1.07, p=0.036). <b>Conclusion:</b> The impact of emotional and behavioural symptoms on adolescents' lives and parental stigmatising attitudes toward mental illness were the main predictors both of service use and costs.</p> |
| <b>Order of Authors:</b>      | <p>Carolina Ziebold</p> <p>Wagner Silva-Ribeiro</p> <p>Derek King</p> <p>David McDaid</p> <p>Maurício Hoffmann</p> <p>Renee Romeo</p> <p>Pedro Pan</p> <p>Euripides Miguel</p> <p>Rodrigo Bressan</p> <p>Luis Augusto Rohde</p> <p>Giovanni Salum</p> <p>Jair Mari</p> <p>Sara Evans-Lacko</p>                                                                                                                                                                                                                                                                                                                                                                                                                                                                                                                                                                                                                                                                                                                                                                                                                                                                                                                                                                                                                                                                                                                                                                                                                                                                                                                                                                                                                                                                                                                                                                                                                                                                                 |
| <b>Response to Reviewers:</b> | We appreciate the careful revision of our manuscript and the comments of the                                                                                                                                                                                                                                                                                                                                                                                                                                                                                                                                                                                                                                                                                                                                                                                                                                                                                                                                                                                                                                                                                                                                                                                                                                                                                                                                                                                                                                                                                                                                                                                                                                                                                                                                                                                                                                                                                                   |

reviewers. We are pleased to be invited to submit the revised version of our paper to PLOS ONE.

Please find attached both an unmarked version of the revised manuscript and one version with changes marked in red. Our point-by-point responses to the reviewers' comments (unquoted italics) and details of the changes we have performed to our revised manuscript are given below.

Reviewer #1:

General Comment: Very relevant and interesting study. Well written paper, I found it pleasant to read. I would recommend some minor adjustments

Response: We appreciate your positive feedback, the careful revision of our manuscript and your comments.

Comment 1: Abstract- When only reading the abstract, the distinction between incident, remittent and persistent disorder in the Results section is a bit confusing. For the abstract, I would recommend rewriting this sentence for example: "Higher odds of service use were associated with having a diagnosed mental disorder (either incident, remittent or persistent), higher impact of symptoms etc."

Response: Thank you for your comment. We have rewritten this sentence as follows: Higher odds of service use were associated with having a diagnosed mental disorder (either incident [OR=2.49, 95%CI=1.44-4.30, p=0.001], remittent [OR=2.16, 95%CI=1.27-3.69, p=0.005] or persistent [OR=3.01, 95%CI=1.69-5.36, p<0.001]), higher impact of symptoms..

Comment 2: Introduction- This study focuses on the economic cost of mental disorders in young people (line 52). Therefore, it should be better introduced why, in addition to (mental) health services, also education, criminal justice and social care services were investigated.

Response: We have edited the introduction as follows:

The high prevalence and potentially enduring nature of these impacts make addressing youth mental health conditions particularly important, but this is a challenge for public systems with limited resources (Knapp M; Evans-Lacko S, 2015). Economic costs associated with youth mental health conditions involve a wide range of sectors including health, educational, social care, and criminal justice services [9,10]. This can represent a substantial cost to the public purse, yet it could also be considered a wise investment given the evidence that effective treatment can mitigate the impact of poor mental health (Knapp et al., 2011).

Comment 3: Line 55: male gender is mostly not associated with higher use of mental health services. Please specify the association between these factors and specific services.

Response: We appreciate your suggestion. We have edited this paragraph in the revised version of the manuscript:

Some studies from high-income countries suggest that lower socioeconomic status, as well as clinical features (illness severity and impact of disorders) are associated with use of health, special education, and social care services, while male gender and older age are associated with more criminal justice services contacts [11,13,14]. These sociodemographic and clinical characteristics are also associated with greater mental health-related treatment costs among young people [11,14,15]

Comment 4: Methods: Data and participants. I understand that not all information about the Brazilian High-Risk Cohort was included in this paper. I would want to know, however, based on what information the children became part of this high risk cohort. Are they COPMI?

Response: Thanks for the important point you raised. We have added information in the methods on the Brazilian High-Risk cohort sampling procedures as follows: This study is nested within the Brazilian High-Risk Cohort (BHRC), which is an ongoing prospective longitudinal study that comprises a community sample and a high-risk sub-sample (a sample at increased risk of mental disorders) of young people from Sao Paulo and Porto Alegre, Brazil. A detailed description of the sample and procedures can be found elsewhere [25]. Briefly, during the registry day, 12,500 parents of young people aged 6 to 14 years attending 57 schools (22 in Porto Alegre and 35 in São Paulo) were invited to a screening of mental health disorders using the Family History

Screen (FHS) [26]. A total of 8,012 families (9,937 eligible children, 45,394 family members) were interviewed. Based on the percentage of members in the family that screened positively for psychiatric disorders, an index of family load for each potential eligible child was computed. The final cohort comprised 2,511 young people; 957 were randomly selected, and 1,554 were a sub-sample at increased risk of mental disorders based on the FHS.

Comment 5: Methods: Measures. Why only maternal educational level?

- Furthermore, this paragraph forms a clear description of appropriate measures.

Response: As stated in the methods section, the socioeconomic group variable comprised head of household educational level in addition to other household socioeconomic indicators. As some research suggests that mothers educational level is particularly important for recognition and help-seeking, we also included this variable as a separate indicator. As the vast majority of caregiver respondents were mothers (in 93% of cases the biological mother [information included in the revised manuscript]) we focused on maternal education rather than estimating the educational level of other caregivers.

Comment 6: Results. Very clear description and informative tables.

Response: Thank you very much for your positive feedback.

Comment 7: Discussion- Line 325: "We found that the health sector was clearly the main sector providing mental health care for youth." That's quite obvious. I would recommend rewriting this, for example: "We found that the health sector was clearly the main sector accessed by youth with mental disorders."

Response: Thank you very much for your suggestion. We rewrote this sentence as follows:

We found that the health sector was clearly the main sector accessed by youth with mental disorders.

Comment 8: In the present study, only 20% of young people with a diagnosed mental disorder received any form of care. In addition to reducing inequality in service use among children, these data also argue for lowering barriers to care for young people in general. I would recommend stating this in the conclusion as well.

Response: Thanks for your suggestion. We have edited the first paragraph of the conclusions as follows:

Our findings suggest that the main drivers of health-related service use costs among adolescents in Brazil were impact of mental health problems, in addition to lower stigma toward people with mental illness among guardians and White ethnicity. In the present study, only 22.4% of young people with a diagnosed mental disorder received any form of care. In addition to reducing inequality in service use among children, our findings also argue for lowering barriers to care, in particular addressing caregiver stigma. Furthermore, because lower use of services in adolescence may be associated with worse outcomes across the life course [47], it is needed to further explore measures to reduce inequalities in service utilisation by young people, even though this implies higher short-term costs.

Comment 9: Line 329: "The lack of youth-oriented primary care mental health programmes". Is this also the reason why GP's/family doctors were less frequently visited?

Response: We appreciate your comment, and we agree with your interpretation of this result. We have edited the referred sentence:

The lack of youth-oriented primary care mental health programmes limits access to treatment when symptoms start to have an impact on adolescent functioning. This can explain why we found a low rate of mental health-related contacts with GP/ family doctors. As a result, contact with specialist mental health services only happens when the disorder has significant negative impact on the lives of young people.

Comment 10: Line 359-361: this reads like the impact of mental health problems on children's lives should be increased because it would support help-seeking. Please, rewrite.

Response: We have rewritten this paragraph:

Guardian's lower stigmatising attitudes towards mental disorders may be crucial to support young people in accessing, engaging and maintaining contact with mental

health-related services. Various anti-stigma interventions have demonstrated effectiveness for improving help-seeking [49], but few have been implemented in LMICs. Further studies are needed to design and implement anti-stigma interventions in LMICs. On the other hand, health and education policies need to better support guardians to access appropriate and timely services in their communities, before the symptoms have a significant impact on adolescent functioning.

Comment 11: Line 363: effectiveness should be effective

Response: Thank you very much, we have corrected this error.

Comment 12: In future research, it would be interesting to not only assess parental stigma but also stigma among the adolescents themselves.

Response: We agree with you, and we are planning to evaluate the association between mental health-related service use and youth stigma towards mental illness in future cohort's assessments.

Reviewer #2:

General comment: It's good to see more representative research from LMICs, trying to bridge the existing knowledge gap. This study's most significant plus point is that it looks at service use and service cost from multiple angles, shedding light on demographic, clinical and systemic factors that contribute to service use cost. However, this manuscript does require significant improvement in language and content. Here are my main suggestions:

Response: We appreciate your positive opinion of our work, the careful revision of our manuscript and your valuable comments.

Comment 1: The language of the manuscript can be crisper. Multiple places sentences look disjointed or elongated. The paragraphs are changed too frequently in some places, with each of these paragraphs containing only one or two sentences.

Response: Thanks for your comment. We have revised and edited the language through the manuscript.

Comment 2: Introduction: In line 57, please clarify whether by 'education services' authors mean remedial education services or some other kind of services?

Response: Thanks for your comment. We have indicated 'special education' in the revised version of the manuscript.

Comment 3: Introduction: The lines 55-58 are difficult to follow: authors claim that certain demographic and clinical characteristics are associated with a greater likelihood of using certain services as per existing research. However, it's not clear how this connects with the assertion about young people in the same sentence.

Response: Thanks for your comment. We have edited and separated these sentences: Some studies from high-income countries suggest that lower socioeconomic status, as well as clinical features (illness severity and impact of disorders) are associated with use of health, special education, and social care services, while male gender and older age are associated with more criminal justice service contacts [11,13,14]. These sociodemographic and clinical characteristics are also associated with greater mental health-related treatment costs among young people [11,14,15].

Comment 4: Introduction: The importance of studying parental stigma needs to be built better.

Response: We appreciate your suggestion. We have included the following changes: Families also play a central role in young people's contact with services. One study from the UK found that lower mental illness-related stigma among caregivers was associated with an increased likelihood of young people's mental health service use [16]. Stigmatising attitudes toward mental illness amongst parents may influence service contacts due to shame and fears of labelling their child's mental health condition [16]. There are clear links between stigma and reduced help-seeking [17], reduced adherence to treatment and early withdrawal from services [17,18]. However, little is known about/ how parental stigma could impact on young people service use and costs.

Comment 5: Introduction: I'm not sure what is meant by 'beyond diagnosis', are authors implying the existing studies cover the cost of diagnosis only or for limited kinds of disorders. Some clarification here would be helpful.

Response: Thanks for your suggestion. We have edited this sentence as follows: Additionally, little is known about how, in addition to the type of disorder, whether persistence of psychopathology from childhood to adolescence, disorders' impact on adolescent's daily life (i.e., functioning), and key barriers to care such as stigma, could influence costs.

Comment 6: Introduction: The way lines 72-73 are written makes it sound like Brazil is a high-income country

Response: We appreciate your comment. We have deleted 'Similar to most high income countries' in the revised version of the manuscript.

Comment 7: Introduction: In line 88, it's unclear what characteristics the authors are referring to and whether the following hypothesis is related to a subset of these characteristics?

Response: We have rewritten this sentence to clarify the characteristics under study: Second, we examine how costs vary according to: mental health trajectories, impact of the disorder on everyday life, and parent/guardian stigma towards mental illness.

Comment 8: Methods: In line 96, some information on how these children were classified as high risk will be helpful. The authors have said the details are somewhere else, but a brief description here will make it easier for the reader to understand the sample.

Response: Thanks for your suggestion. As explained in response to Reviewer 1's comment 4, we have included a brief description of the Brazilian High-Risk Cohort sampling procedures.

Comment 9: Methods: In line 99, it was slightly hard to follow study timelines. Was this study carried out after the first follow-up in 2014-2015 or as part of the follow-up?

Response: We have tried to clarify this including the following information: Cohort participants were interviewed at baseline (aged 6-14 years, calendar year:2010-2011, n=2,511), and at first follow-up (N=2010, aged 9-17 years, calendar year 2014). After completing the BHRC first follow-up interview, 1,881 parents/guardians were invited to respond to a supplementary interview which included a comprehensive assessment of mental health related service use (calendar year: 2014-2015, young people participants aged 10-18 years).

Comment 10: Methods: The authors can use consistent terminology: children or young people. As of now, this has varied from one sentence to another.

Response: Thanks for your comment. We have revised and edited the methods section in order to use consistently the term young people.

Comment 11: The '!' in line 102 seems typo.

Response: We appreciate your comment. We have deleted this typo.

Comment 12: Methods: In lines 127-130, it's unclear why young people were not interviewed at baseline but were included during the 3-year follow-up?

Response: This was because participants were younger at baseline and so we relied on parent's report, given limitations in funding and resources. Given that older adolescents are better at reporting internalising symptoms, both guardian and youth interviews were performed at 3-year follow-up. We included this explanation in the revised version of the manuscript:

At baseline, diagnostic assessment and interviews were performed with guardians only. Previous literature has found that self-reports on internalising conditions during adolescence is higher compared with parental report. This can be explained because internalising problems, such as anxiety or depression, would be less observable by guardians, being advisable to consider both reports to reach a reliable evaluation of adolescent mental health [30,31]. For this reason, diagnostic assessment at 3-year follow-up was performed considering guardian reports and additional information from interviews with the young people about internalising conditions.

Comment 13: Methods: Do authors have any psychometric properties of the adapted version of Service Assessment for Children and Adolescents that can be reported in this publication?

Response:

The parent-report SACA has been shown to be a valid measure of young people's service use ( $\kappa = 0.76$ ; [Hoagwood et al., 2000]) with test-retest reliability for past-year reports (ranging from 0.75 to 0.86; [Horwitz et al., 2001]). We have not assessed the psychometric properties of the adapted version of the Service Assessment for Children and Adolescents for Brazilian participants yet. We have included this limitation in the revised version of the manuscript.

Comment 14: Results: In line 224, the authors refer to Table 1. However, without any commentary on the significance of data in this table, the authors jump to a new set of findings. All this makes it slightly hard to follow what is being presented.

Response: We appreciated your comment. We have edited this paragraph:

Table 1 describes sociodemographic and clinical characteristics of participants. The sample comprised 1,400 adolescents with a mean age of 14 years ( $s.d=1.98$ ). The majority were white males from low SEG, and only 10% of mothers had university education. 23.3% ( $n= 326$ ) of adolescents had a psychiatric disorder in the previous 12 months, of which 177 (54.3%) were incident and 149 (45.7%) persistent cases since baseline. 213 (15.2%) participants had remitted from a baseline psychiatric diagnosis. Participants with externalising disorders were more likely to have persistent trajectories ( $RR=2.19$ ,  $95\%CI=1.38-3.48$ ,  $p<0.001$ ). Participants categorised as persistent also reported greater disorder impact ( $=2.34$ ,  $95\%CI=2.11-2.58$ ,  $p<0.001$ ). 22.4% of those who presented with a psychiatric disorder reported using some type of service for their mental health in the previous twelve months. The proportion of service use among those who presented a persistent psychiatric condition was 27%. Table 1 also describes the mean costs of mental health-related service use in the past year, by psychiatric trajectory (from no diagnosis to persistent psychiatric diagnosis). Bivariate analyses showed a non-significant association between psychiatric trajectory and mean annual costs.

Comment 15: The 12-month service use and service use cost means are presented in Tables 1 and 2. Repeating the same findings across two tables should be avoided  
Response: We have deleted the last line of Table 2 (overall services cost).

Comment 16: The paragraph on page 12 lacks a description of the cost associated with each service? For e.g., although CAPS is not a highly prevalent service, the associated cost makes for a lion contribution to the public purse. This needs to be presented and discussed.

Response: Thank you very much for your suggestion. We edited this paragraph as follows:

Utilisation of mental health services in the previous 12 months and associated cost by type of service are presented in Table 2. Overall, 10.0% of the sample ( $n=143$ ) used some sort of health, education, criminal justice or social care service for mental health problems. Disaggregating by sectors, the health sector had highest proportion of service users (9%), while the education and social care and criminal justice sectors were less frequently contacted with a 1.8% and 1.3% of users, respectively. Outpatient mental health services, most notably psychologists and psychiatrists in settings other than community mental health clinics, were the most frequently used services/professionals. Inpatient services and general health services such as GP/family doctor, paediatrician and emergency department, were less frequently used. In the education sector, school assistant was the most type of service used by young people, while guardianship council was the most frequently social care service contacted. The total cost of 12-month mental health-related service use for the public purse was 70,110.23 USD. The sector that presented higher total annual cost was the health sector, followed by the education and finally the social care and criminal justice sectors. The services that generated the greatest total costs for the health sector were psychologist (11,339.64 USD) and CAPS (9,628.01 USD). Among those who used services, the average annual cost of service use amounted to 527.14 USD ( $SD=908.10$  USD,  $range=8.77-7,605.58$  USD,  $median=221.10$  USD,  $interquartile\ range=545.28$ ) per user. Individuals using CAPS (specialty mental health) services (1.1% of the sample) had the highest mean number of visits during the previous year and the highest associated costs among health services. The second highest mean



costs in the health sector were related to hospitalizations in psychiatric hospitals and alcohol and drugs clinics, while the lowest mean costs were attributed to emergency department, paediatrician, outpatient alcohol and drugs and GP/family doctor contacts. Although only 0.1% of individuals used shelters, this type of social service had the highest associated mean cost. Education services were used by 1.8% of individuals and these services had the second highest associated mean costs.

Comment 17: Discussion: In line 288, the use of the terms 'above and beyond' doesn't convey much. To the best of my knowledge, the current analysis nowhere helps to reach this conclusion of above and beyond. I am requesting authors to look at terminology closely.

Response: Thanks for your suggestion. We have removed this language.

We found that impact of mental health problems on daily life and parental stigma were the most consistent and robust drivers of mental health service use and associated costs..

Comment 18: Discussion: Lines 301-312 can be streamlined and better organised.

Response: We have edited the cited lines as follows:

We did not find any study exploring the impact of parental stigmatising attitudes toward mental illness on child treatment costs. Other research has shown that parental stigma can impede problem recognition and help-seeking [17,43]. Higher stigma amongst parents and caregivers may discourage or delay service access for their children [16], which may reduce the short-term public sector direct costs of treatment but be detrimental in the long run. Future research needs to further explore the mechanisms through which parental stigma may be related to service/treatment selection and treatment adherence, in order to explain its impact on treatment costs. Moreover, as lower parental stigma may facilitate earlier service contact, it would be interesting to investigate if lower parental stigma may result in lower costs in the longer term.

Comment 19: Discussion: Line 327: The number of CAPS users was less, but the number of visits and costs for those who used it were very high. These were not reflected in the discussion, nor were its implication for the restructuring health system.

Response: We appreciate your comment. We have edited the discussion as suggested:

In Brazil, access to CAPS does not require any referral. However, the number of CAPS services are limited, and they are focused on treatment of severe mental disorders [24]. The high costs incurred by the mental health sector for the treatment of psychiatric disorders in CAPS may be a result of both, the severity of patients consulting these services and because these services provide intensive outpatient treatments (reflected by the highest number of visits we found), which is costly compared with no-specialized services. It is important to highlight that the lack of youth-oriented primary care mental health services in Brazil which limits access to treatment. This could explain why we found low frequency of mental health-related contacts with GP/ family doctors. As a result, contact with specialist mental health services only happens when the disorder has significant negative impact on the lives of young people. (Moved from the conclusion as suggested in your last comment). In this sense, the organisation of a mental health network of care for adolescents, integrating primary care, social care, education, criminal justice and community youth-specialist services, according to the impact of cases, must be considered in Brazil to adequately plan and allocate scarce public budgets [47].

Comment 20: Discussion: The hypothesis stated that researchers were interested in examining the impact of persistence of psychiatric disorders from childhood to adolescence on service costs; however, the discussion did not give much attention to this part.

Response: Thanks for rising this important comment. We have included the following paragraph:

Contrary to what we expected, we did not find an association between disorder persistence and costs. Our analyses instead found that impact of the disorder on adolescent's life was the most important clinical predictor and that this was what seemed to drive service use rather than type or persistence of diagnosis.

Nevertheless, it is important to consider that we have estimated annual costs, and these do not necessarily reflect the cumulative economic costs of persistent cases across childhood and adolescence.

|                                                                                                                                                                                                                                                                                                                                                                                                                                                                                                                                                                                                                                                                                                                                                                                                                                                                                                                                                                                                                                                                                                                                                                                                                                                                                                                                                                                     |                                                                                                                                                                                                                                                                                                                                                                                                                                                                                                                                                                                                                                                                                                                                                                                                                                                                                                                                                                                                                                                                                                                                                                                                                                                                                                                                                                                  |
|-------------------------------------------------------------------------------------------------------------------------------------------------------------------------------------------------------------------------------------------------------------------------------------------------------------------------------------------------------------------------------------------------------------------------------------------------------------------------------------------------------------------------------------------------------------------------------------------------------------------------------------------------------------------------------------------------------------------------------------------------------------------------------------------------------------------------------------------------------------------------------------------------------------------------------------------------------------------------------------------------------------------------------------------------------------------------------------------------------------------------------------------------------------------------------------------------------------------------------------------------------------------------------------------------------------------------------------------------------------------------------------|----------------------------------------------------------------------------------------------------------------------------------------------------------------------------------------------------------------------------------------------------------------------------------------------------------------------------------------------------------------------------------------------------------------------------------------------------------------------------------------------------------------------------------------------------------------------------------------------------------------------------------------------------------------------------------------------------------------------------------------------------------------------------------------------------------------------------------------------------------------------------------------------------------------------------------------------------------------------------------------------------------------------------------------------------------------------------------------------------------------------------------------------------------------------------------------------------------------------------------------------------------------------------------------------------------------------------------------------------------------------------------|
|                                                                                                                                                                                                                                                                                                                                                                                                                                                                                                                                                                                                                                                                                                                                                                                                                                                                                                                                                                                                                                                                                                                                                                                                                                                                                                                                                                                     | <p>Comment 21: Conclusion: Some of the text in the last paragraph of the conclusion, i.e. those referring to implications, can be moved to discussion and expanded further. I'm not able to comment on cost analysis as this is not my area of expertise.<br/>Response: Thanks for your suggestions, we have moved some conclusions to the discussion as explained in response to your Comment #20.</p>                                                                                                                                                                                                                                                                                                                                                                                                                                                                                                                                                                                                                                                                                                                                                                                                                                                                                                                                                                          |
| <p><b>Additional Information:</b></p>                                                                                                                                                                                                                                                                                                                                                                                                                                                                                                                                                                                                                                                                                                                                                                                                                                                                                                                                                                                                                                                                                                                                                                                                                                                                                                                                               |                                                                                                                                                                                                                                                                                                                                                                                                                                                                                                                                                                                                                                                                                                                                                                                                                                                                                                                                                                                                                                                                                                                                                                                                                                                                                                                                                                                  |
| <p><b>Question</b></p>                                                                                                                                                                                                                                                                                                                                                                                                                                                                                                                                                                                                                                                                                                                                                                                                                                                                                                                                                                                                                                                                                                                                                                                                                                                                                                                                                              | <p><b>Response</b></p>                                                                                                                                                                                                                                                                                                                                                                                                                                                                                                                                                                                                                                                                                                                                                                                                                                                                                                                                                                                                                                                                                                                                                                                                                                                                                                                                                           |
| <p><b>Financial Disclosure</b></p> <p>Enter a financial disclosure statement that describes the sources of funding for the work included in this submission. Review the <a href="#">submission guidelines</a> for detailed requirements. View published research articles from <a href="#">PLOS ONE</a> for specific examples.</p> <p>This statement is required for submission and <b>will appear in the published article</b> if the submission is accepted. Please make sure it is accurate.</p> <p><b>Unfunded studies</b><br/>Enter: <i>The author(s) received no specific funding for this work.</i></p> <p><b>Funded studies</b><br/>Enter a statement with the following details:</p> <ul style="list-style-type: none"> <li>• Initials of the authors who received each award</li> <li>• Grant numbers awarded to each author</li> <li>• The full name of each funder</li> <li>• URL of each funder website</li> <li>• Did the sponsors or funders play any role in the study design, data collection and analysis, decision to publish, or preparation of the manuscript?</li> <li>• <b>NO</b> - Include this sentence at the end of your statement: <i>The funders had no role in study design, data collection and analysis, decision to publish, or preparation of the manuscript.</i></li> <li>• <b>YES</b> - Specify the role(s) played.</li> </ul> <p>* typeset</p> | <p>The research presented in this article was funded by the European Research Council under the European Union's Seventh Framework Programme (FP7/2007-2013)/ERC grant agreement no 337673, and supported by the National Institute of Developmental Psychiatry for Children and Adolescents, a science and technology institute funded by Conselho Nacional de Desenvolvimento Científico e Tecnológico (CNPq; National Council for Scientific and Technological Development; grant numbers 573974/2008-0 and 465550/2014-2) and Fundação de Amparo à Pesquisa do Estado de São Paulo (FAPESP grant number 2008/57896-8 and 2014/50917-0). SEL receives support from the UK Medical Research Council in relation to the Mentalkit-Brazil project (MR/R022763/1) and the Economic and Social Research Council. CZ received a doctoral scholarship and research abroad scholarship by the Fundação de Amparo à Pesquisa do Estado de São Paulo (grant number 2018/05586-7 and 2019/08731-0). MSH was supported by the Newton International Fellowship (Ref: NIFR1\181942), awarded by the Academy of Medical Sciences through the UK Government's Newton Fund Programme. The funding organisations had no role in the study design; collection, analysis or interpretation of data; in the writing of this article; or in the decision to submit the article for publication.</p> |
| <p><b>Competing Interests</b></p> <p>Use the instructions below to enter a competing interest statement for this submission. On behalf of all authors, disclose any <a href="#">competing interests</a> that</p>                                                                                                                                                                                                                                                                                                                                                                                                                                                                                                                                                                                                                                                                                                                                                                                                                                                                                                                                                                                                                                                                                                                                                                    | <p>All authors report no conflict of interest associated with this publication. Luis Augusto Rohde has received grant or research support from, served as a consultant to, and served on the speakers' bureau of Aché, Bial, Medice, Novartis/Sandoz, Pfizer/Upjohn, and Shire/Takeda in the last three years. The ADHD and Juvenile Bipolar Disorder Outpatient Programs chaired by Dr Rohde have received unrestricted educational and research support from the following pharmaceutical companies in the last three years:</p>                                                                                                                                                                                                                                                                                                                                                                                                                                                                                                                                                                                                                                                                                                                                                                                                                                               |



|                                                                                                                                                                                                                                                                                                                                                                                                                                                                                                                                                                                                                                                                                                                                                                                                                                                                                                                                                                                                                          |                                                                                                                                                                                                                                                                                                                                                                                                                                                                                                                                                                                                                                                                                                                                                            |
|--------------------------------------------------------------------------------------------------------------------------------------------------------------------------------------------------------------------------------------------------------------------------------------------------------------------------------------------------------------------------------------------------------------------------------------------------------------------------------------------------------------------------------------------------------------------------------------------------------------------------------------------------------------------------------------------------------------------------------------------------------------------------------------------------------------------------------------------------------------------------------------------------------------------------------------------------------------------------------------------------------------------------|------------------------------------------------------------------------------------------------------------------------------------------------------------------------------------------------------------------------------------------------------------------------------------------------------------------------------------------------------------------------------------------------------------------------------------------------------------------------------------------------------------------------------------------------------------------------------------------------------------------------------------------------------------------------------------------------------------------------------------------------------------|
| <p>could be perceived to bias this work—acknowledging all financial support and any other relevant financial or non-financial competing interests.</p> <p>This statement is <b>required</b> for submission and <b>will appear in the published article</b> if the submission is accepted. Please make sure it is accurate and that any funding sources listed in your Funding Information later in the submission form are also declared in your Financial Disclosure statement.</p> <p>View published research articles from <a href="#">PLOS ONE</a> for specific examples.</p> <p><b>NO authors have competing interests</b></p> <p>Enter: <i>The authors have declared that no competing interests exist.</i></p> <p><b>Authors with competing interests</b></p> <p>Enter competing interest details beginning with this statement:</p> <p><i>I have read the journal's policy and the authors of this manuscript have the following competing interests: [insert competing interests here]</i></p> <p>* typeset</p> | <p>Novartis/Sandoz and Shire/Takeda. Dr Rohde has received authorship royalties from Oxford Press and ArtMed. None of these commercial relationships alter our adherence to PLOS ONE policies on sharing data and materials.</p>                                                                                                                                                                                                                                                                                                                                                                                                                                                                                                                           |
| <p><b>Ethics Statement</b></p> <p>Enter an ethics statement for this submission. This statement is required if the study involved:</p> <ul style="list-style-type: none"> <li>• Human participants</li> <li>• Human specimens or tissue</li> <li>• Vertebrate animals or cephalopods</li> <li>• Vertebrate embryos or tissues</li> <li>• Field research</li> </ul> <p>Write "N/A" if the submission does not require an ethics statement.</p>                                                                                                                                                                                                                                                                                                                                                                                                                                                                                                                                                                            | <p>This research was carried out in accordance with the latest version of the Declaration of Helsinki This research was carried out in accordance with the latest version of the Declaration of Helsinki. Parental written informed consent was obtained from all the research subjects. Young people provided verbally informed assent (documented as part of the consent form, and witnessed by the interviewer), and those who were able to read and write also provided written consent. All procedures were approved by the Ethics Committee of the Federal University of São Paulo-UNIFESP (N° 2.879.533 and - CAAE 06457219.9.0000.5505), Hospital de Clínicas de Porto Alegre (CAAE 06457219.9.3001.5327) and the European Research Commission</p> |

General guidance is provided below.  
Consult the [submission guidelines](#) for detailed instructions. **Make sure that all information entered here is included in the Methods section of the manuscript.**

#### Format for specific study types

##### Human Subject Research (involving human participants and/or tissue)

- Give the name of the institutional review board or ethics committee that approved the study
- Include the approval number and/or a statement indicating approval of this research
- Indicate the form of consent obtained (written/oral) or the reason that consent was not obtained (e.g. the data were analyzed anonymously)

##### Animal Research (involving vertebrate animals, embryos or tissues)

- Provide the name of the Institutional Animal Care and Use Committee (IACUC) or other relevant ethics board that reviewed the study protocol, and indicate whether they approved this research or granted a formal waiver of ethical approval
- Include an approval number if one was obtained
- If the study involved *non-human primates*, add *additional details* about animal welfare and steps taken to ameliorate suffering
- If anesthesia, euthanasia, or any kind of animal sacrifice is part of the study, include briefly which substances and/or methods were applied

##### Field Research

Include the following details if this study involves the collection of plant, animal, or other materials from a natural setting:

- Field permit number
- Name of the institution or relevant body that granted permission

#### Data Availability

Authors are required to make all data

No - some restrictions will apply

underlying the findings described fully available, without restriction, and from the time of publication. PLOS allows rare exceptions to address legal and ethical concerns. See the [PLOS Data Policy](#) and [FAQ](#) for detailed information.

A Data Availability Statement describing where the data can be found is required at submission. Your answers to this question constitute the Data Availability Statement and **will be published in the article**, if accepted.

**Important:** Stating 'data available on request from the author' is not sufficient. If your data are only available upon request, select 'No' for the first question and explain your exceptional situation in the text box.

Do the authors confirm that all data underlying the findings described in their manuscript are fully available without restriction?

**Describe where the data may be found in full sentences. If you are copying our sample text, replace any instances of XXX with the appropriate details.**

- If the data are **held or will be held in a public repository**, include URLs, accession numbers or DOIs. If this information will only be available after acceptance, indicate this by ticking the box below. For example: *All XXX files are available from the XXX database (accession number(s) XXX, XXX).*
- If the data are all contained **within the manuscript and/or Supporting Information files**, enter the following: *All relevant data are within the manuscript and its Supporting Information files.*
- If neither of these applies but you are able to provide **details of access elsewhere**, with or without limitations, please do so. For example:

*Data cannot be shared publicly because of [XXX]. Data are available from the*

Access to data and Data sharing: CZ have full access to all the data used in the study and takes responsibility for the integrity of the data and the accuracy of the data analysis. Data were provided by the Brazilian High-Risk Cohort study and are available upon request in the Open Science Framework public repository (<https://osf.io/ktz5h/>).

*XXX Institutional Data Access / Ethics Committee (contact via XXX) for researchers who meet the criteria for access to confidential data.*

*The data underlying the results presented in the study are available from (include the name of the third party and contact information or URL).*

- This text is appropriate if the data are owned by a third party and authors do not have permission to share the data.

\* typeset

Additional data availability information:

# Utilisation and costs of mental health-related service use among adolescents

Carolina Ziebold<sup>1</sup>, Wagner Ribeiro<sup>1,2</sup>, Derek King<sup>2</sup>, David McDaid<sup>2</sup>, Mauricio Hoffmann<sup>2,3,4,5</sup>,  
Renee Romeo<sup>6</sup>, Pedro Pan<sup>1,5</sup>, Euripides Miguel<sup>5,7</sup>, Rodrigo Bressan<sup>1,5</sup>, Luis Augusto Rohde<sup>5,8,9</sup>,  
Giovanni Salum<sup>5,9</sup>, Jair Mari<sup>1,5</sup>, and Sara Evans-Lacko<sup>2\*</sup>

<sup>1</sup> Departamento de Psiquiatria, Universidade Federal de São Paulo, São Paulo, Brazil

<sup>2</sup> Care Policy and Evaluation Centre, London School of Economics and Political Science,  
London, United Kingdom

<sup>3</sup> Universidade Federal de Santa Maria, Santa Maria, Brazil

<sup>4</sup> Hospital de Clínicas de Porto Alegre, Porto Alegre, Brazil

<sup>5</sup> National Institute of Developmental Psychiatry for Children and Adolescents, São Paulo,  
Brazil

<sup>6</sup> King's College London, London, United Kingdom

<sup>7</sup> Universidade de São Paulo, São Paulo, Brazil

<sup>8</sup> ADHD Outpatient Program & Developmental Psychiatry Program, Hospital de Clínicas de  
Porto Alegre, Brazil.

<sup>9</sup> Universidade Federal do Rio Grande do Sul, Porto Alegre, Brazil

\*Corresponding author: Email: S.Evans-Lacko@lse.ac.uk (SEL)

## 21 **Abstract**

22 **Background:** The high burden of care for adolescents with mental health disorders represents  
23 a challenge to the public sector, especially in low and middle-income countries. We aimed to  
24 estimate the costs to the public purse of health, education, criminal justice and social care  
25 service use associated with psychiatric disorders among adolescents in Brazil; and to examine  
26 whether the trajectory of psychopathology and its impact on daily life, and parental stigma  
27 towards mental illness, may be associated with service utilisation and costs.

28 **Methods:** Data on reported service use among adolescents from a prospective community  
29 cohort (n=1,400) were combined with Brazilian unit costs. Logistic regression and generalised  
30 linear models were used to examine predictors of service use and associated costs, respectively.

31 **Results:** Twenty-two percent of those who presented with a psychiatric disorder used some type  
32 of service for their mental health in the previous twelve months. Higher odds of service use  
33 were associated with having a diagnosed mental disorder (either incident, [OR=2.49,  
34 95%CI=1.44-4.30, p=0.001], remittent [OR=2.16, 95%CI=1.27-3.69, p=0.005] or persistent  
35 [OR=3.01, 95%CI=1.69-5.36, p<0.001]), higher impact of symptoms on adolescent's life  
36 (OR=1.32, 95%CI=1.19-1.47, p<0.001) and lower parental stigma toward mental illness  
37 (OR=1.12, 95%CI=1.05-1.20, p=0.001). Average annual cost of service use was 527.14 USD  
38 (s.d.= 908.10). Higher cost was predicted by higher disorder impact ( $\beta=0.25$ , 95% CI=0.12-0.39,  
39 p<0.001), lower parental stigma ( $\beta=0.12$ , 95%CI=0.02–0.23, p=0.020) and white ethnicity  
40 ( $\beta=0.55$ , 95%CI=0.04–1.07, p=0.036). **Conclusion:** The impact of emotional and behavioural  
41 symptoms on adolescents' lives and parental stigmatising attitudes toward mental illness were  
42 the main predictors both of service use and costs.

43 **Key words:** Service Utilisation, Mental Health, Adolescence, Health Economics



## 44 **Introduction**

45           Mental health conditions affect 13.4% of children and adolescents globally, representing  
46 the leading cause of disability in this age group [1]. They can have long-term impacts on health  
47 and social outcomes into adulthood [2–7]. The high prevalence and potentially enduring nature  
48 of these impacts make addressing youth mental health conditions particularly important, but  
49 this is a challenge for public systems with limited resources [8]. Economic costs associated with  
50 youth mental health conditions involve a wide range of sectors including health, educational,  
51 social care, and criminal justice services [9,10]. This can represent a substantial cost to the  
52 public purse, yet it could also be considered a wise investment given the evidence that effective  
53 treatment can mitigate the impact of poor mental health [2]. Estimating the economic cost of  
54 mental disorders in young people from the perspective of the public purse and understanding  
55 which factors are associated with these costs could support more effective and efficient policy  
56 planning and care delivery [8,11,12].

57           Some studies from high-income countries suggest that lower socioeconomic status, as  
58 well as clinical features (illness severity and impact of disorders) are associated with use of  
59 health, special education, and social care services, while male gender and older age are  
60 associated with more criminal justice services contacts [11,13,14]. These sociodemographic  
61 and clinical characteristics are also associated with greater mental health-related treatment costs  
62 among young people [11,14,15]. Families also play a central role in young people's contact  
63 with services. One study from the UK found that lower mental illness-related stigma among  
64 caregivers was associated with an increased likelihood of young people's mental health service  
65 use [16]. Stigmatising attitudes toward mental illness amongst parents may influence service  
66 contacts due to shame and fears of labelling their child's mental health condition [16]. There  
67 are clear links between stigma and reduced help-seeking [17], reduced adherence to treatment

68 and early withdrawal from services [17,18]. However, little is known about how parental  
69 stigma could impact on young people service use and costs. 

70 Most costing studies have focused on a single disorder, commonly autism, attention  
71 deficit hyperactivity disorder or conduct disorders [10]. Additionally, little is known about how,  
72 in addition to the type of disorder, whether persistence of psychopathology from childhood to  
73 adolescence, disorders' impact on adolescent's daily life (i.e. functioning), and key barriers to  
74 care such as stigma, could influence costs.

75 There are a limited number of studies reporting on prevalence of mental health service  
76 use in low and middle-income countries (LMICs) [19–21], however, none use validated service  
77 use measures. Moreover, prevalence of any use does not capture the intensity of use (e.g.  
78 number or type of visits) needed to understand the economic impact of child mental health  
79 problems. From a global mental health perspective, examining this issue in a LMIC context,  
80 where resources are scarce, is of major significance. Brazil provides universal access to health  
81 services and education for the entire population that is free at the point of use, while private  
82 health care and education are used by about 20% of the population [22–24]. Estimating the  
83 economic cost of mental disorders among young people to the public purse, and understanding  
84 which factors are associated with these costs in Brazil is essential for public policy planning,  
85 specifically to optimise investment. This approach could also be of value for similar health and  
86 welfare systems.

87 Furthermore, examining the variation in costs according to clinical characteristics of  
88 adolescents, beyond type of diagnosis, is important as the impact of psychopathology on daily  
89 life and the trajectory of psychopathology from childhood to adolescence, may support service  
90 planning and resource allocation in relation to clinical characteristics in a preventive and  
91 responsive way.

92           The aim of this study is to estimate the costs associated with health, education, criminal  
93 justice and social care services among a cohort of young people in Brazil. We first present the  
94 annual aggregate cost to the public purse and then disaggregate this impact to reflect and  
95 understand the relative costs to different sectors. Second, we examine how costs vary according  
96 to: mental health trajectories, impact of the disorder on everyday life, and parent/guardian  
97 stigma towards mental illness. We hypothesise that persistence of psychiatric disorders from  
98 childhood to adolescence and associated impact on adolescents' lives have the greatest  
99 influence on costs. However, we also expect that lower levels of parental stigma towards mental  
100 illness will predict greater likelihood of service use and hence higher costs.

## 101 **Methods**

### 102 **Data and participants**

103           This study is nested within the Brazilian High-Risk Cohort (BHRC), which is an  
104 ongoing prospective longitudinal study that comprises a community sample and a high-risk sub-  
105 sample (a sample at increased risk of mental disorders) of young people from Sao Paulo and  
106 Porto Alegre, Brazil. A detailed description of the sample and procedures can be found  
107 elsewhere [25]. Briefly, during the registry day, 12,500 parents of young people aged 6 to 14  
108 years attending 57 schools (22 in Porto Alegre and 35 in São Paulo) were invited to a screening  
109 of mental health disorders using the Family History Screen (FHS) [26]. A total of 8,012 families  
110 (9,937 eligible children, 45,394 family members) were interviewed. Based on the percentage  
111 of members in the family that screened positively for psychiatric disorders, an index of family  
112 load for each potential eligible child was computed. The final cohort comprised 2,511 young  
113 people; 957 were randomly selected, and 1,554 were a sub-sample at increased risk of mental  
114 disorders based on the FHS. Cohort participants were interviewed at baseline (aged 6-14 years,

115 calendar year:2010-2011, n=2,511), and at first follow-up (N=2010, aged 9-17 years, calendar  
116 year 2014). After completing the BHRC first follow-up interview, 1,881 parents/guardians were  
117 invited to respond to a supplementary interview which included a comprehensive assessment  
118 of mental health related service use (calendar year: 2014-2015, young people participants aged  
119 10-18 years). Among those contacted, 1,400 (74.4%) guardians (in 93.1% of cases the  
120 biological mother) completed the interview –982 (70.1%) by telephone and 418 (29.9%) face-  
121 to-face  See flow chart in S1 Fig.). There were no significant differences in persistence of  
122 psychopathology or impact of psychopathology on adolescents' lives among respondents  
123 versus non-respondents.

124 This research was carried out in accordance with the latest version of the Declaration of  
125 Helsinki. Parental written informed consent was obtained from all the research subjects. Young  
126 people provided verbally informed assent (documented as part of the consent form, and  
127 witnessed by the interviewer), and those who were able to read and write also provided written  
128 consent. All procedures were approved by the Ethics Committee of the Federal University of  
129 São Paulo-UNIFESP (Nº 2.879.533 and CAAE 06457219.9.0000.5505), Hospital de Clínicas  
130 de Porto Alegre (CAAE 06457219.9.3001.5327) and the European Research Commission. Data  
131 were provided by the Brazilian High-Risk Cohort study and are available upon request in the  
132 Open Science Framework public repository (<https://osf.io/ktz5h/>).

133

## 134 **Measures**

### 135 **Sociodemographic Characteristics**

136 Data on the following sociodemographic characteristics were collected: gender, age at follow-  
137 up, ethnicity (white and non-white: black, Asian, indigenous or mixed-race), socioeconomic  
138 group (SEG), and maternal educational level (no/basic, secondary or university education).

139 SEG was defined according to a Brazilian standardized questionnaire [27]. Based on families'  
140 assets and head of household's education level, a total score ranging for 0 to 46 is given, where  
141 greater scores represent higher socioeconomic status. In this study, SEG was categorised as  
142 "low" (0-22) and "high" (23-46).

143

## 144 **Psychopathology**

145

146 **Psychiatric diagnosis:** Psychiatric diagnoses were assessed at baseline and follow-up using the  
147 Brazilian-Portuguese version of the Development and Well-being Assessment (DAWBA)  
148 [28,29], which is a highly structured interview used to generate DSM-IV diagnoses. Trained  
149 interviewers gathered information on current problems causing significant distress or social  
150 impairment. At baseline, diagnostic assessment and interviews were performed with guardians  
151 only. Previous literature has found that self-report on internalising conditions during  
152 adolescence is higher compared with parental report. This can be explained because  
153 internalising problems, such as anxiety or depression, would be less observable by guardians,  
154 being advisable to consider both reports to reach a reliable evaluation of adolescent mental  
155 health [30,31]. For this reason, diagnostic assessment at 3-year follow-up was performed  
156 considering guardian reports and additional information from interviews with the young people  
157 about internalising conditions. Computerised diagnostic probabilities were then generated  
158 based on responses those were carefully evaluated by 9 trained psychiatrists who determined  
159 the diagnosis.

160

161 **Broad psychiatric diagnostic categories:** Based on previous literature [32], follow-up  
162 DAWBA diagnoses were grouped into three broad categories: distress-related disorders

163 (including depression, generalised anxiety disorder, obsessive – compulsive disorder, tic, eating  
164 disorder), fear-related disorders (including panic, agoraphobia, social anxiety, specific phobia  
165 and separation anxiety) and externalising disorders (including conduct disorder, oppositional  
166 defiant disorder and attention deficit/hyperactivity disorder).

167

168 **Persistence of diagnosis:** Four categories of diagnostic persistence were created based on  
169 presence of diagnosis at baseline and/or follow-up: 1) no diagnosis (no diagnosis at both time  
170 points), 2) incident (no diagnosis at baseline and presence of diagnosis at follow-up), 3)  
171 remittent (presence of diagnosis at baseline and no diagnosis at follow-up), 4) persistent  
172 (presence of diagnosis at both time points).

173

174 **Impact of mental health problems at follow-up:** was measured according to the ‘impact  
175 supplement’ of the Strength and Difficulties Questionnaire (SDQ) which is part of DAWBA.  
176 This supplement assesses the impact of behavioural and emotional difficulties on adolescent’s  
177 lives according to guardian reports. A total score (0-10) was generated by summing 5 items:  
178 distress, social impairment in family life, friendships, learning, and leisure activities [33].  
179 Higher scores represent greater impact. The impact score has demonstrated internal  
180 consistency, cross-informant correlations, and stability measured across time [33].

181

## 182 **Parent-reported stigma towards mental health problems**

183 To assess parental stigma, we applied the Brazilian Portuguese version of the Reported  
184 and Intended Behaviour Scale (RIBS-BP) [34,35]. The intended behaviour subscale assesses  
185 future intended stigmatising behaviour across four domains: living with, working with, living  
186 nearby and continuing a relationship with someone with a mental health problem. Higher scores



187 represent lower stigma. The RIBS-BP has demonstrated good internal consistency, and good to  
188 excellent construct validity [35].

189

## 190 **Service use**

191 The Service Assessment for Children and Adolescents (SACA) [36] was used to ask  
192 guardians about service contacts made in the past 12 months in response to concerns regarding  
193 their child's emotions and behaviour, including alcohol and drugs. The SACA assesses type,  
194 nature, frequency and duration of services used, treatments received and settings in which  
195 services were delivered. Overall concordance between parent report and records ( $\kappa=0.76$ )  
196 [36] and test-retest reliability for 12-month ( $\kappa=0.75-0.86$ ) service use on the parent version  
197 of the SACA is strong [37].

198 We received permission from the SACA developers to translate and adapt the  
199 instrument to the Brazilian context in consultation with experts in the Brazilian mental health  
200 system to ensure we covered the relevant service types and settings in Brazil. The list of services  
201 and professionals was grouped into three sectors: 1) health care: inpatient services (psychiatric  
202 hospital, psychiatric unit in a general hospital, alcohol and drug clinic); outpatient services  
203 (Centre for psychosocial care [CAPS], which are the community mental health services in  
204 Brazil; mental health clinics; specialist mental health professionals (psychiatrists and  
205 psychologists in settings other than CAPS and mental health clinics); general health services  
206 and professionals (emergency room, paediatrician, general practitioner [GP] or family doctor);  
207 2) education: special school and special education in regular school (special room and special  
208 needs class assistant); 3) social care and criminal justice: overnight stay in a shelter or detention  
209 centre; probation programme contact; and home visit of the guardianship council (services  
210 responsible for child-rights protection).

211

## 212 **Estimation of costs**

213 Data collected on use of services from the BHRC were combined with unit costs to  
214 derive service use costs in Brazilian Reals for the financial year 2018 and then converted to US  
215 dollars (based on December 31 2018 conversion rate 1 Real=0.2581 dollars, according to the  
216 Brazilian Central Bank) [38].

217 **Unit costs:** Detailed information on source of information and unit cost values for each service  
218 is available in S1 Table. Where available, we applied unit costs previously reported in the  
219 Brazilian literature [39,40]. However, as costs of many services have not previously been  
220 reported, we performed a thorough consultation process gathering relevant data from public  
221 databases of the Ministries of Education and Health, and the social care departments of the  
222 municipalities of Porto Alegre and São Paulo (S1 Table).

223 Unit costs were attached to data on service use frequencies for each type of service  
224 (based on the SACA) based on 2018 prices or the latest available year converted to 2018 prices  
225 using the Nationwide Consumer Price Index. The Brazil Central Bank's calculator was used to  
226 apply the index [41]. Once obtained, information on the unit cost of each service was used to  
227 calculate the total annual cost by sector (health, education, social care and criminal justice) for  
228 each participant by multiplying the frequency of use (e.g. number of visits, nights) by unit cost.

## 229 **Data Analysis**

230 Data were analysed using STATA, version 14. First, we described prevalence of socio-  
231 demographic and clinical characteristics overall and by persistence of psychopathology.  
232 Between-group differences were compared using chi-squared tests. For interval variables,  
233 means and standard deviations were calculated and overall significance was tested using one-

234 way analysis of variance. A significance parameter of  $p < .05$  (two-tailed) was applied for all  
235 tests.

236 Unadjusted odds ratios and coefficients for each predictor and covariate in relation to  
237 mental health service use and costs are presented in S2 and S3 Tables. To compare the relative  
238 impact between our three main predictors (i.e., psychopathological trajectories, impact of the  
239 disorder and parental stigma) of service use and costs we also present logistic regression models  
240 for each of these variables adjusting for sociodemographic characteristics (gender, age,  
241 mother's education, ethnicity and SEG) and dummy variables (mode of data collection and city  
242 of residence) (S4-S6 Tables for service use and S7-S9 Tables for costs). We then used  
243 multivariable analyses to examine the association between guardian and adolescent  
244 characteristics with service use (logistic regression models) and associated costs (generalised  
245 linear models – GLM), overall and by sector: 1) health; 2) education; and 3) social care and  
246 criminal justice. All multivariable analyses were adjusted by socio-demographic characteristics,  
247 mode of data collection and city. For costs GLM, we analysed the subset of participants who  
248 used services in the previous 12 months ( $n=143$ ). Annual costs for each participant were  
249 included in the models as a scalar dependent variable, with a Gamma distribution [42], using  
250 the log-link function.

## 251 **Results**

252 Table 1 describes sociodemographic and clinical characteristics of participants. The  
253 sample comprised 1,400 adolescents with a mean age of 14 years (s.d=1.98). The majority were  
254 white males from low SEG, and only 10% of mothers had university education. 23.3% ( $n= 326$ )  
255 of adolescents had a psychiatric disorder in the previous 12 months, of which 177 (54.3%) were  
256 incident and 149 (45.7%) persistent cases since baseline. 213 (15.2%) participants had remitted  
257 from a baseline psychiatric diagnosis. Participants with externalising disorders were more likely

258 to have persistent trajectories (RR=2.19, 95% CI=1.38-3.48, p<0.001). Participants categorised  
259 as persistent also reported greater disorder impact ( $\beta=2.34$ , 95% CI=2.11-2.58, p<0.001). 22.4%  
260 of those who presented with a psychiatric disorder reported using some type of service for their  
261 mental health in the previous twelve months. The proportion of service use among those who  
262 presented a persistent psychiatric condition was 27%.  Table 1 also describes the mean costs of  
263 mental health-related service use in the past year, by psychiatric trajectory (from no diagnosis  
264 to persistent psychiatric diagnosis). Bivariate analyses showed a non-significant association  
265 between psychiatric trajectory and mean annual costs.

266 **Table 1. Sociodemographic and clinical characteristics by trajectories of psychopathology (n=1,400).**

|                                          | No psychiatric diagnosis<br>(n=861) | Incident psychiatric diagnosis<br>(n=177) | Remittent psychiatric diagnosis<br>(n=213) | Persistent psychiatric diagnosis<br>(n=149) | Overall sample<br>(n=1,400) | p                |
|------------------------------------------|-------------------------------------|-------------------------------------------|--------------------------------------------|---------------------------------------------|-----------------------------|------------------|
|                                          | N (%)                               | N (%)                                     | N (%)                                      | N (%)                                       | N (%)                       |                  |
| <i>Sociodemographic characteristics</i>  |                                     |                                           |                                            |                                             |                             |                  |
| Male gender                              | 503 (58.4)                          | 81 (45.8)                                 | 134 (62.9)                                 | 83 (55.7)                                   | 801 (57.2)                  | <b>0.005</b>     |
| Female gender                            | 358 (41.6)                          | 96 (54.2)                                 | 79 (37.1)                                  | 66 (44.3)                                   | 599 (42.8)                  |                  |
| Age, mean (s.d)                          | 14.50 (2.02)                        | 14.58 (1.90)                              | 14.39 (1.88)                               | 14.67 (1.99)                                | 14.51 (1.98)                | 0.564            |
| High SEG                                 | 359 (41.7)                          | 63 (35.6)                                 | 71 (33.3)                                  | 61 (40.9)                                   | 554 (39.6)                  | 0.095            |
| Low SEG                                  | 502 (58.3)                          | 114 (64.4)                                | 142 (66.7)                                 | 88 (59.1)                                   | 846 (60.4)                  |                  |
| White ethnicity                          | 484 (56.2)                          | 106 (60.2)                                | 116 (54.5)                                 | 84 (57.1)                                   | 790 (56.6)                  | 0.704            |
| Non-White ethnicity                      | 377 (43.8)                          | 70 (39.8)                                 | 97 (45.5)                                  | 63 (42.9)                                   | 607 (43.5)                  |                  |
| <i>Guardians characteristics</i>         |                                     |                                           |                                            |                                             |                             |                  |
| Maternal no/basic education              | 387 (45.1)                          | 78 (44.6)                                 | 96 (45.3)                                  | 59 (39.9)                                   | 620 (44.5)                  | 0.953            |
| Maternal secondary education             | 384 (44.8)                          | 78 (44.6)                                 | 93 (43.9)                                  | 71 (48.0)                                   | 626 (44.9)                  |                  |
| Maternal university education            | 87 (10.14)                          | 19 (10.9)                                 | 23 (10.9)                                  | 18 (12.2)                                   | 147 (10.6)                  |                  |
| <i>Clinical characteristics</i>          |                                     |                                           |                                            |                                             |                             |                  |
| Any Psychiatric Diagnosis                | -                                   | 177 (54.3)                                | -                                          | 149 (45.7)                                  | 326 (23.3)                  | <b>&lt;0.001</b> |
| Fear-related                             | -                                   | 92 (52.0)                                 | -                                          | 72 (48.3)                                   | 164 (11.7)                  | <b>&lt;0.001</b> |
| Distress-related                         | -                                   | 70 (40.0)                                 | -                                          | 60 (40.3)                                   | 130 (9.3)                   | <b>&lt;0.001</b> |
| Externalising                            | -                                   | 49 (27.7)                                 | -                                          | 68 (45.6)                                   | 117 (8.4)                   | <b>0.001</b>     |
| SDQ impact mean score (s.d)              | 0.28 (0.73)                         | 1.49 (1.91)                               | 0.78 (1.51)                                | 2.62 (2.41)                                 | 0.78 (1.52)                 | <b>&lt;0.001</b> |
| <i>Mental health-related service use</i> |                                     |                                           |                                            |                                             |                             |                  |
| 12-months service use                    | 43 (5.0)                            | 32 (18.0)                                 | 27 (12.7)                                  | 41 (27.5)                                   | 143 (10.21)                 | <b>&lt;0.001</b> |
| Mean service use costs USD\$ (s.d)       | 326.41 (395.53)                     | 581.90 (1360.19)                          | 644.35 (795.50)                            | 628.50 (901.02)                             | 527.14 (908.10)             | 0.400            |

267 Notes: Results in bold are significant. SEG, socioeconomic group; SDQ, Strength and Difficulties Questionnaire. 3 missing data in ethnicity variable, 10 missing data  
268 in maternal education variable.

## 269 **Frequency of mental health-related service use and annual service** 270 **use costs**

271 Utilisation of mental health services in the previous 12 months and associated cost by  
272 type of service are presented in Table 2. Overall, 10.0% of the sample (n=143) used some sort  
273 of health, education, criminal justice or social care service for mental health problems.  
274 Disaggregating by sectors, the health sector had highest proportion of service users (9%), while  
275 the education and social care and criminal justice sectors were less frequently contacted with a  
276 1.8% and 1.3% of users respectively. Outpatient mental health services, most notably  
277 psychologists and psychiatrists in settings other than community mental health clinics, were the  
278 most frequently used services/professionals. Inpatient services and general health services such  
279 as GP/family doctor, paediatrician and emergency department, were less frequently used. In the  
280 education sector, school assistant was the most type of service used by young people, while  
281 guardianship council was the most frequently social care service contacted. The total cost of  
282 12-month mental health-related service use for the public purse was 70,110.23 USD. The sector  
283 that presented higher total annual cost was the health sector, followed by the education and  
284 finally the social care and criminal justice sectors. The services that generated the greatest total  
285 costs for the health sector were psychologist (11,339.64 USD) and CAPS (9,628.01 USD).  
286 Among those who used services, the average annual cost of service use amounted to 527.14  
287 USD (SD= 908.10 USD, range=8.77- 7,605.58 USD, median=221.10 USD, interquartile  
288 range=545.28) per user. Individuals using CAPS (specialty mental health) services (1.1% of the  
289 sample) had the highest mean number of visits during the previous year and the highest  
290 associated costs among health services. The second highest mean costs in the health sector were  
291 related to hospitalizations in psychiatric hospitals and alcohol and drugs clinics, while the  
292 lowest mean costs were attributed to emergency department, paediatrician, outpatient alcohol



293 and drugs and GP/family doctor contacts. Although only 0.1% of individuals used shelters, this  
294 type of social service had the highest associated mean cost. Education services were used by  
295 1.8% of individuals and these services had the second highest associated mean costs.  
296

297 **Table 2. 12-month mental health-related service use and costs by type of service (n = 143).**

|                                                                     | Users     | Number of visits/ nights | Number of nights/visits per user <sup>a</sup> | Total annual cost per service | Annual cost per user                 |
|---------------------------------------------------------------------|-----------|--------------------------|-----------------------------------------------|-------------------------------|--------------------------------------|
| Type of service                                                     | n (%)     | Total                    | Mean (Range; s.d.)                            | USD <sup>a,b</sup>            | Mean (Range; s.d.)                   |
| <b>Health Sector</b>                                                |           |                          |                                               |                               |                                      |
| <i>Inpatient mental health services<sup>3</sup></i>                 |           |                          |                                               |                               |                                      |
| Psychiatric hospital                                                | 7 (0.5)   | 73                       | 10.6 (1 – 30;11.87)                           | 4,015.72                      | 573.67 (66.42-1,992.72;691.76)       |
| Psychiatric unit in general hospital                                | 1 (0.1)   | 1                        | 1 (1)                                         | 40.49                         | 40.49                                |
| AD clinic                                                           | 3 (0.2)   | 48                       | 16 (6 – 27;10.73)                             | 1,767.90                      | 589.30 (191.87-1,096.36;462.10)      |
| <i>Outpatient mental health services</i>                            |           |                          |                                               |                               |                                      |
| Centre for psychosocial care (CAPS)                                 | 15 (1.1)  | 452                      | 30.15(1-180;49.38)                            | 9,628.01                      | 740.62 (24.56-4,421.03;1212.73)      |
| Mental Health clinic                                                | 17 (1.2)  | 308                      | 18.13(1-70;19.08)                             | 5,644.64                      | 352.79 (19.46-1,362.50;371.28)       |
| Psychiatrist                                                        | 33 (2.4)  | 217                      | 6.56 (1-48;8.95)                              | 5,803.90                      | 181.37(27.64-1,326.60;247.29)        |
| Psychologist                                                        | 71 (5.1)  | 1,081                    | 15.23 (1-60;14.97)                            | 11,339.64                     | 171.81(11.28-676.99;168.91)          |
| AD clinic                                                           | 2 (0.1)   | 2                        | 1 (1)                                         | 14.74                         | 14.74                                |
| <i>General Health</i>                                               |           |                          |                                               |                               |                                      |
| Emergency department                                                | 4 (0.3)   | 9                        | 2.25 (1-4;1.50)                               | 156.0                         | 39.00 (17.34-69.34;26.00)            |
| Paediatrician                                                       | 3 (0.2)   | 10                       | 3.33 (2-4;1.16)                               | 120.54                        | 40.18 (24.11-48.22;13.92)            |
| GP/family doctor                                                    | 5 (0.4)   | 23                       | 4.60 (2-9;2.97)                               | 403.25                        | 80.65 (35.07-157.80;52.01)           |
| <i>Overall health service use</i>                                   | 126 (9.0) |                          |                                               | 37,679.94                     | 324.83 (11.28-4575.70;590.55)        |
| <b>Educational sector<sup>4</sup></b>                               |           |                          |                                               |                               |                                      |
| Special School                                                      | 7(0.5)    |                          | School Year                                   | 8,564.92                      | 1,223.56 (1,155.72-1,250.70; 44.53)  |
| Special Class                                                       | 5 (0.4)   |                          | School Year                                   | 6,063.55                      | 1,212.71 (1,155.72-1,250.70; 52.02)  |
| School Assistant                                                    | 12 (0.9)  |                          | School Year                                   | 14,723.52                     | 1,226.96 (1,155.72-1,250.70; 42.95)  |
| <i>Overall education service use</i>                                | 23 (1.8)  |                          |                                               | 29,351.94                     | 1,276.17 (1,155.72-2,501.40; 270.73) |
| <b>Social care and criminal justice sector</b>                      |           |                          |                                               |                               |                                      |
| Shelter                                                             | 2 (0.1)   | 210                      | 105 (90-120;21.21)                            | 5,599.95                      | 2,799.98 (2,755.34-2,888.48; 63,12)  |
| Guardianship Council home visit                                     | 11 (0.8)  | 31                       | 2.85 (1-5;1.73)                               | 201.84                        | 25.23 (8.77-43.87;15.15)             |
| Probation programme                                                 | 8 (0.6)   |                          | Six months                                    | 1,875.48                      | 234.44                               |
| <i>Overall social care and criminal justice related service use</i> | 18 (1.3)  |                          |                                               | 4,687.47                      | 334.82 (8.77-2,888.48;1,155.72)      |

298 <sup>a</sup>Total cost health sector N=116, Total cost education sector, N=23, Total cost social care and criminal justice sector, N=14. Total cost, N=133. Cases with missing  
299 values in 'frequency of visits' were not included in costs estimates: CAPS=2, mental health clinic=1, psychiatrist=1, psychologist=5, AD clinic=1, guardianship  
300 council=3.

301 <sup>b</sup>Costs are expressed U.S. Dollars, 2018 prices. Brazilian Central Bank conversion rate: Brazilian Real=0.2581, December 31st 2018[38]

302 **Characteristics associated with mental health-related service use**

303           Having an incident, remittent or persistent psychiatric disorder, as well as the higher  
304 impact of behavioural and emotional difficulties on the adolescents' lives and lower parental  
305 stigma, all predicted higher odds of any 12-month service use (Table 3). Service contacts in the  
306 health sector were also predicted by the same factors. Service use in the educational sector was  
307 predicted by impact, lower parental stigma and low SEG. There were no factors significantly  
308 associated with use of social care and criminal justice services.

309

310 **Table 3. Multivariable logistic regression models: Predictors of 12-month mental health service utilisation (n=1,390<sup>a</sup>).**

| Predictors                              | Any service use                 |                  | Health service use                |                  | Education service use            |                  | Social care and criminal justice service use |       |
|-----------------------------------------|---------------------------------|------------------|-----------------------------------|------------------|----------------------------------|------------------|----------------------------------------------|-------|
|                                         | OR (95%CI)                      | p                | OR (95%CI)                        | p                | OR (95%CI)                       | p                | OR (95%CI)                                   | p     |
| <i>Sociodemographic characteristics</i> |                                 |                  |                                   |                  |                                  |                  |                                              |       |
| Male gender (Ref)                       | -                               |                  | -                                 |                  | -                                |                  | -                                            |       |
| Female gender                           | 0.87 (0.59-1.28)                | 0.488            | 0.98 (0.65-1.46)                  | 0.901            | 0.67 (0.24-.84)                  | 0.435            | 1.28 (0.48-3.40)                             | 0.627 |
| Age (in years)                          | 1.02 (0.92-1.12)                | 0.703            | 1.00 (0.90-1.11)                  | 0.942            | 0.98 (0.78-1.25)                 | 0.886            | 1.25 (0.97-1.60)                             | 0.084 |
| High SEG (Ref)                          |                                 |                  |                                   |                  |                                  |                  |                                              |       |
| Low SEG                                 | 1.30 (0.86-1.98)                | 0.211            | 1.11 (0.72-1.70)                  | 0.646            | <b>4.31 (1.29-14.39)</b>         | <b>0.018</b>     | 2.97 (0.75-11.77)                            | 0.122 |
| White ethnicity (Ref)                   | -                               |                  | -                                 |                  | -                                |                  | -                                            |       |
| Non-White ethnicity                     | 1.17 (0.79-1.72)                | 0.442            | 0.97 (0.64-1.46)                  | 0.869            | 0.53 (0.19-1.48)                 | 0.225            | 2.59 (0.92-7.28)                             | 0.071 |
| <i>Guardians characteristics</i>        |                                 |                  |                                   |                  |                                  |                  |                                              |       |
| Maternal no/basic education (Ref)       | -                               |                  | -                                 |                  | -                                |                  | -                                            |       |
| Maternal secondary education            | 1.23 (0.82-1.85)                | 0.315            | 1.30 (0.84-1.99)                  | 0.238            | 1.77 (0.66-4.78)                 | 0.257            | 0.51 (0.17-1.54)                             | 0.233 |
| Maternal university education           | 1.14 (0.59-2.20)                | 0.698            | 1.17 (0.59-2.31)                  | 0.658            | 1.33 (0.24-7.53)                 | 0.744            | 1.02 (0.19-5.54)                             | 0.981 |
| Lower parental stigma (RIBS scores)     | <b>1.12 (1.05-1.20)</b>         | <b>0.001</b>     | <b>1.11 (1.03-1.18)</b>           | <b>0.003</b>     | <b>1.22 (1.01-1.48)</b>          | <b>0.042</b>     | 1.01 (0.94-1.25)                             | 0.251 |
| <i>Clinical characteristics</i>         |                                 |                  |                                   |                  |                                  |                  |                                              |       |
| No psychiatric diagnosis (Ref)          | -                               |                  | -                                 |                  | -                                |                  | -                                            |       |
| Incident psychiatric diagnosis          | <b>2.49 (1.44-4.30)</b>         | <b>0.001</b>     | <b>2.57 (1.45-4.58)</b>           | <b>0.001</b>     | 2.29 (0.51-10.97)                | 0.281            | 2.54 (0.61-10.52)                            | 0.199 |
| Remittent psychiatric diagnosis         | <b>2.16 (1.27-3.69)</b>         | <b>0.005</b>     | <b>2.22 (1.25-3.93)</b>           | <b>0.006</b>     | 3.24 (0.84-12.50)                | 0.087            | 1.98 (0.45-8.75)                             | 0.369 |
| Persistent psychiatric diagnosis        | <b>3.01 (1.69-5.36)</b>         | <b>&lt;0.001</b> | <b>3.33 (1.82-6.08)</b>           | <b>&lt;0.001</b> | 2.82 (0.65-12.37)                | 0.168            | 3.65 (0.88-15.09)                            | 0.073 |
| SDQ impact score                        | <b>1.32 (1.19-1.47)</b>         | <b>&lt;0.001</b> | <b>1.32 (1.19-1.47)</b>           | <b>&lt;0.001</b> | <b>1.51 (1.24-1.84)</b>          | <b>&lt;0.001</b> | 1.22 (0.97-1.55)                             | 0.096 |
| Test statistics                         | LR $\chi^2(13)= 129.35$ p<0.001 |                  | LR $\chi^2(13)= 122.81$ , p<0.001 |                  | LR $\chi^2(13)= 57.46$ , p<0.001 |                  | LR $\chi^2(13)= 28.36$ , p=0.008             |       |
|                                         | Pseudo-R <sup>2</sup> =0.14     |                  | Pseudo-R <sup>2</sup> =0.15       |                  | Pseudo-R <sup>2</sup> =0.25      |                  | Pseudo-R <sup>2</sup> =0.15                  |       |

311 <sup>a</sup>From the total sample, N=1,400, 10 cases had missing data in mother's education and 3 in ethnicity variables. Results in bold are statistically significant (p<0.05).

312 Models adjusted by collection instrument and city.

313

314 **Characteristics associated with greater mental health related**  
315 **service use costs**

316 When all three sectors were combined into a single total cost variable, greater impact,  
317 lower parental stigma and white ethnicity were associated with higher costs (Table 4). Each  
318 additional impact score predicted an increase in mean costs of 142.59 USD ( $p < 0.001$ ). For  
319 parental stigma, each additional RIBS-BP score (indicating lower stigma) increased mean cost  
320 by 69.32 USD ( $p = 0.020$ ). White ethnicity was associated with having higher mean costs of  
321 295.49 USD ( $p = 0.036$ ), compared with non-white participants. No association was found  
322 between broad diagnosis categories and costs (S10 Table).

323 When looking at predictors of costs according to sector, disorder impact was associated  
324 with greater health sector service use (predicted mean cost by each impact score = 66.26 USD,  
325  $p = 0.019$ ). We did not find any significant association of psychiatric trajectories, impact of  
326 disorder or parental stigma with education or social care/criminal justice sectors' costs.

327

328 **Table 4. Generalised linear models: parental and clinical characteristics associated with cost of mental health service use in the last 12 months,**  
 329 **overall and by sector.**

| Predictors                              | Any service use<br>N= 131   |                  | Health service use<br>N=115 |              | Education service use<br>N=22 |       | Social care and criminal<br>justice service use N=14 |       |
|-----------------------------------------|-----------------------------|------------------|-----------------------------|--------------|-------------------------------|-------|------------------------------------------------------|-------|
|                                         | β (95% CI)                  | p                | β (95% CI)                  | p            | β (95% CI)                    | p     | β (95% CI)                                           | p     |
| <i>Sociodemographic characteristics</i> |                             |                  |                             |              |                               |       |                                                      |       |
| Male gender (Ref)                       | -                           |                  | -                           |              | -                             |       | -                                                    |       |
| Female gender                           | 0.05 (-0.50-0.59)           | 0.866            | 0.06 (-0.61-0.73)           | 0.854        | -0.03 (-0.29-0.24)            | 0.857 | 14.41 (-5.34-34.17)                                  | 0.153 |
| Age (in years)                          | -0.05 (-0.19-0.10)          | 0.522            | 0.06 (-0.14-0.24)           | 0.572        | 0.02 (-0.02-0.06)             | 0.886 | -2.11 (-4.87-0.65)                                   | 0.133 |
| High SEG (Ref)                          |                             |                  |                             |              |                               |       |                                                      |       |
| Low SEG                                 | 0.47 (-0.08-1.03)           | 0.092            | -0.13 (-0.78-0.53)          | 0.706        | -0.03 (-0.36-0.29)            | 0.839 | 3.32 (-8.52-15.15)                                   | 0.583 |
| White ethnicity (Ref)                   | -                           |                  | -                           |              | -                             |       | -                                                    |       |
| Non-White ethnicity                     | <b>-0.55 (-1.07- -0.04)</b> | <b>0.036</b>     | -0.12 (-0.75-0.51)          | 0.707        | 0.09 (-0.10-0.27)             | 0.368 | -4.28 (-9.80-1.24)                                   | 0.129 |
| <i>Guardians characteristics</i>        |                             |                  |                             |              |                               |       |                                                      |       |
| Maternal no/basic education (Ref)       | -                           |                  | -                           |              | -                             |       | -                                                    |       |
| Maternal secondary education            | 0.27 (-0.29-0.82)           | 0.341            | -0.10 (-0.78-0.58)          | 0.776        | -0.07 (-0.23-0.10)            | 0.418 | 4.95 (-2.19-12.08)                                   | 0.174 |
| Maternal university education           | 0.003 (-0.90-0.91)          | 0.995            | -0.34 (-1.38-0.69)          | 0.515        | 0.40 (-0.07-0.87)             | 0.094 | -                                                    | -     |
| Lower parental stigma (RIBS score)      | <b>0.12 (0.12-0.39)</b>     | <b>0.020</b>     | 0.04 (-0.07-0.16)           | 0.465        | 0.002 (-0.06-0.06)            | 0.948 | 0.05 (-0.98-1.08)                                    | 0.922 |
| <i>Clinical characteristics</i>         |                             |                  |                             |              |                               |       |                                                      |       |
| No psychiatric diagnosis (Ref)          | -                           |                  | -                           |              | -                             |       | -                                                    |       |
| Incident psychiatric diagnosis          | -0.14 (-0.83-0.55)          | 0.693            | 0.15 (-0.71-1.00)           | 0.735        | 0.07 (-0.15-0.29)             | 0.548 | -23.61 (-54.48-7.27)                                 | 0.134 |
| Remittent psychiatric diagnosis         | 0.39 (-0.35-1.14)           | 0.298            | 0.09 (-0.85-1.04)           | 0.847        | -0.01 (-0.23-0.21)            | 0.928 | -2.17 (-7.42-3.07)                                   | 0.417 |
| Persistent psychiatric diagnosis        | -0.39 (-1.16-0.38)          | 0.315            | -0.42 (-1.40- 0.58)         | 0.412        | 0.14 (-0.11-0.39)             | 0.276 | -17.23 (-36.84-2.39)                                 | 0.085 |
| SDQ impact score                        | <b>0.25 (0.12-0.39)</b>     | <b>&lt;0.001</b> | <b>0.20 (1.19-1.47)</b>     | <b>0.019</b> | 0.01 (-0.02-0.04)             | 0.458 | -0.34 (-1.51-0.83)                                   | 0.569 |
| Test statistics <sup>a</sup>            | AIC 16.97193                |                  | AIC 16.24671                |              | AIC 20.26365                  |       | AIC 15.83608                                         |       |
|                                         | BIC -353.9633               |                  | BIC -308.0671               |              | BIC -24.59063                 |       | BIC 1.230216                                         |       |
|                                         | R <sup>2</sup> = 0.22       |                  | R <sup>2</sup> = 0.15       |              | R <sup>2</sup> = 0.79         |       | R <sup>2</sup> = 0.90                                |       |

330 Notes: Results in bold are significant (p<0.05). Models adjusted by city and method of interview.

331 <sup>a</sup>Cameron & Windmeijer's R-squared, measure of goodness of fit for the class of exponential family regression models.



## 332 **Discussion**

333 We analysed data on mental health-related service use and associated costs among a  
334 prospective community cohort of young people in Brazil. We found that impact of mental health  
335 problems on daily life and parental stigma were the most consistent and robust drivers of mental  
336 health service use and associated costs.

### 337 **Drivers of mental-health service use costs**

338 The association between disorder impact and mental health-related service use and costs  
339 that we found has been observed in previous research, providing further support that impact  
340 and impairment tend to be the strongest and most robust predictors of mental health service use  
341 [13,33] and costs [14]. Contrary to what we expected, we did not find an association between  
342 disorder persistence and costs. Our analyses instead found an that impact of the disorder on  
343 adolescent's life was the most important clinical predictor and that this was what seemed to  
344 drive service use rather than type or persistence of diagnosis. Nevertheless, it is important to  
345 consider that we have estimated annual costs, and these do not necessarily reflect the cumulative  
346 economic costs of persistent cases across childhood and adolescence.

347 A novel result we found was that lower parental stigma was associated with greater  
348 service use and higher costs. Our findings suggest that the ways in which parents perceive  
349 mental illness in adolescents may significantly influence help-seeking. We are aware of one  
350 study which showed that young people's likelihood of service use across health and education  
351 settings was greater among caregivers who reported less intended stigmatising behaviours [16]  
352 Another study indicated that low parental stigmatising attitudes toward mental disorders  
353 increased recognition of mental health problems in preadolescents (10-12 years) [43].

354 We did not find any study exploring the impact of parental stigmatising attitudes toward  
355 mental illness on child treatment costs. Other research has shown that parental stigma can

356 impede problem recognition and help-seeking [17,43]. Higher stigma amongst parents and  
357 caregivers may discourage or delay service access for their children [16], which may reduce the  
358 short-term public sector direct costs of treatment but be detrimental in the long run. Future  
359 research needs to further explore the mechanisms through which parental stigma may be related  
360 to service/treatment selection and treatment adherence, in order to explain its impact on  
361 treatment costs. Moreover, as lower parental stigma may facilitate earlier service contact, it  
362 would be interesting to investigate if lower parental stigma may result in lower costs in the  
363 longer term.

364         Among sociodemographic variables, we found that low SEG predicted higher odds of  
365 educational service use. This may be related to the fact that young people living in deprived  
366 circumstances are more likely to be affected by developmental problems [44], and, therefore,  
367 are more likely to use special education services [11]. Although our study did not identify any  
368 differences in service use according to ethnicity, we found white ethnicity was associated with  
369 higher service use costs. This may reflect disparities in the type of mental health treatment  
370 offered or available to non-white children/adolescents. According to previous studies, non-  
371 white children/adolescents are less likely to receive adequate mental health treatment [45],  
372 including lower likelihood of psychopharmacological prescriptions [46], compared with white  
373 children/adolescents.

374

## 375 **The economic impact of adolescent mental health care by sectors**

376         We found that the health sector was clearly the main sector accessed by youth with  
377 mental disorders. Within the health sector, specialty mental health care was used more  
378 frequently and was more costly than primary care. In Brazil, access to CAPS does not require  
379 any referral. However, the number of CAPS services are limited, and they are focused on

380 treatment of severe mental disorders [24].  The high costs incurred by the mental health sector  
381 for the treatment of psychiatric disorders in CAPS may be a result of both, the severity of  
382 patients consulting these services and because these services provide intensive outpatient  
383 treatments (reflected by the highest number of visits we found), which is costly compared with  
384 no-specialized services. It is important to highlight that the lack of youth-oriented primary care  
385 mental health services in Brazil limits access to treatment. This could explain why we found  
386 low frequency of mental health-related contacts with GP/ family doctors. As a result, contact  
387 with specialist mental health services only happens when the disorder has significant negative  
388 impact on the lives of young people. In this sense, the organisation of a mental health network  
389 of care for adolescents, integrating primary care, social care, education, criminal justice and  
390 community youth-specialist services, according to the impact of cases, must be considered in  
391 Brazil to adequately plan and allocate scarce public budgets [47].

392 We found that mental-health related educational service use was less prevalent  
393 compared with health service use, nevertheless –as previous studies have shown– [11,14]  
394 educational service use was also associated with higher costs. In Brazil, while special education  
395 services are provided in regular schools, their use is restricted to students with disabilities and  
396 developmental disorders [48], so only adolescents with severe mental disorders are likely to be  
397 eligible.

398

## 399 **Limitations**

400 Our study has several limitations. First, the psychometric properties of the adapted  
401 version of the SACA have not been evaluated yet. Second, as we were not able to access  
402 administrative records, service use assessment was limited to guardians' reports. However, the  
403 concordance between parent report and records for service use on the parental version of the

404 SACA is strong [36]. Third, as most of the unit cost were specifically identified for the cities  
405 where the HRC is being conducted, São Paulo and Porto Alegre, they are not necessarily  
406 generalisable to the whole country. Fourth, due to the limited number of participants using each  
407 type of service, we were unable to compare factors related with use and associated costs of  
408 specific types of service. Furthermore, given our estimates come from observational cohort  
409 data, we are not able to establish causality.

## 410 **Conclusions**

411 Our findings suggest that the main drivers of health-related service use costs among  
412 adolescents in Brazil were impact of mental health problems, in addition to lower stigma toward  
413 people with mental illness among guardians and White ethnicity. In the present study, only  
414 22.4% of young people with a diagnosed mental disorder received any form of care. In addition  
415 to reducing inequality in service use among children, our findings also argue for lowering  
416 barriers to care, in particular addressing caregiver stigma. Furthermore, because lower use of  
417 services in adolescence may be associated with worse outcomes across the life course [47], it  
418 is needed to further explore measures to reduce inequalities in service utilisation by young  
419 people, even though this implies higher short-term costs.

420 Guardian's lower stigmatising attitudes towards mental disorders may be crucial to  
421 support young people in accessing, engaging and maintaining contact with mental health-  
422 related services. Various anti-stigma interventions have demonstrated effectiveness for  
423 improving help-seeking [49], but few have been implemented in LMICs. Further studies are  
424 needed to design and implement anti-stigma interventions in LMICs. On the other hand, health  
425 and education policies need to better support guardians to access appropriate and timely  
426 services in their communities, before the symptoms have a significant impact on adolescent  
427 functioning. We conclude that the organisation of a culturally sensitive mental health network

428 of care for adolescents, integrating primary care, social care, education, criminal justice services  
429 and CAPS, must be considered in Brazil to adequately plan and allocate scarce public budgets

430 **Financial Support:** The research presented in this article was funded by the European Research  
431 Council under the European Union's Seventh Framework Programme (FP7/2007-2013)/ERC  
432 grant agreement no 337673, and supported by the National Institute of Developmental  
433 Psychiatry for Children and Adolescents, a science and technology institute funded by Conselho  
434 Nacional de Desenvolvimento Científico e Tecnológico (CNPq; National Council for Scientific  
435 and Technological Development; grant numbers 573974/2008-0 and 465550/2014-2) and  
436 Fundação de Amparo à Pesquisa do Estado de São Paulo (FAPESP grant number 2008/57896-  
437 8 and 2014/50917-0). SEL receives support from the UK Medical Research Council in relation  
438 to the Mentalkit-Brazil project (MR/R022763/1) and the Economic and Social Research  
439 Council. CZ received a doctoral scholarship and research abroad scholarship by the Fundação  
440 de Amparo à Pesquisa do Estado de São Paulo (grant number 2018/05586-7 and 2019/08731-  
441 0). MSH was supported by the Newton International Fellowship (Ref: NIF\R1\181942),  
442 awarded by the Academy of Medical Sciences through the UK Government's Newton Fund  
443 Programme. The funding organisations had no role in the study design; collection, analysis or  
444 interpretation of data; in the writing of this article; or in the decision to submit the article for  
445 publication.

446 **Conflicts of interests:** All authors report no conflict of interest associated with this publication.  
447 Luis Augusto Rohde has received grant or research support from, served as a consultant to, and  
448 served on the speakers' bureau of Aché, Bial, Medice, Novartis/Sandoz, Pfizer/Upjohn, and  
449 Shire/Takeda in the last three years. The ADHD and Juvenile Bipolar Disorder Outpatient  
450 Programs chaired by Dr Rohde have received unrestricted educational and research support  
451 from the following pharmaceutical companies in the last three years: Novartis/Sandoz and

452 Shire/Takeda. Dr Rohde has received authorship royalties from Oxford Press and ArtMed.  
453 None of these commercial relationships alter our adherence to PLOS ONE policies on sharing  
454 data and materials.

455

456 **Access to data and Data sharing:** CZ have full access to all the data used in the study and  
457 takes responsibility for the integrity of the data and the accuracy of the data analysis. Data were  
458 provided by the Brazilian High-Risk Cohort study and are available upon request in the Open  
459 Science Framework public repository (<https://osf.io/ktz5h/>).

460

## REFERENCES

- 461 1. Polanczyk G V., Salum GA, Sugaya LS, Caye A, Rohde LA. Annual Research Review:  
462 A meta-analysis of the worldwide prevalence of mental disorders in children and  
463 adolescents. *J Child Psychol Psychiatry*. 2015;56: 345–365. doi:10.1111/jcpp.12381
- 464 2. Knapp M, King D, Healey A, Thomas C. Economic outcomes in adulthood and their  
465 associations with antisocial conduct, attention deficit and anxiety problems in  
466 childhood. *J Ment Health Policy Econ*. 2011;14: 137–47.
- 467 3. Kim-Cohen J, Caspi A, Moffitt TE, Harrington H, Milne BJ, Poulton R. Prior juvenile  
468 diagnoses in adults with mental disorder: developmental follow-back of a prospective-  
469 longitudinal cohort. *Arch Gen Psychiatry*. 2003;60: 709–17.  
470 doi:10.1001/archpsyc.60.7.709
- 471 4. Richards, M; Abbott R. Childhood mental health and life chances in post-war Britain.  
472 Insights from three national birth cohort studies. London: The Smith Institute,  
473 Sainsbury Centre for Mental Health & Unison; 2009.
- 474 5. Chen H, Cohen P, Kasen S, Johnson JG, Berenson K, Gordon K. Impact of Adolescent  
475 Mental Disorders and Physical Illnesses on Quality of Life 17 Years Later. *Arch*  
476 *Pediatr Adolesc Med*. 2006;160: 93. doi:10.1001/archpedi.160.1.93
- 477 6. Zechmeister I, Kilian R, McDaid D. Is it worth investing in mental health promotion  
478 and prevention of mental illness? A systematic review of the evidence from economic  
479 evaluations. *BMC Public Health*. 2008;8: 20. doi:10.1186/1471-2458-8-20
- 480 7. McCrone P, Knapp M, Fombonne E. The Maudsley long-term follow-up of child and  
481 adolescent depression. *Eur Child Adolesc Psychiatry*. 2005;14: 407–413.  
482 doi:10.1007/s00787-005-0491-6
- 483 8. Knapp M; Evans-Lacko S. Health Economics. 6th ed. In: Thapar A, Pine D, editors.  
484 Rutter's Child and Adolescent Psychiatry. 6th ed. Wiley-Blackwell; 2015. pp. 227–  
485 238.

- 486 9. Knapp M, Wong G. Economics and mental health: the current scenario. *World*  
487 *Psychiatry*. 2020;19: 3–14. doi:10.1002/wps.20692
- 488 10. Beecham J. Annual Research Review: Child and adolescent mental health  
489 interventions: a review of progress in economic studies across different disorders. *J*  
490 *Child Psychol Psychiatry*. 2014;55: 714–732. doi:10.1111/jcpp.12216
- 491 11. Snell T, Knapp M, Healey A, Guglani S, Evans-Lacko S, Fernandez JL, et al.  
492 Economic impact of childhood psychiatric disorder on public sector services in Britain:  
493 Estimates from national survey data. *J Child Psychol Psychiatry*. 2013; 1–9.  
494 doi:10.1111/jcpp.12055
- 495 12. Funk M, Saraceno B, Lund C, Flisher AJ, Green A, Knapp M, et al. Planning and  
496 budgeting to deliver services for mental health. *Mental health policy and service*  
497 *guidance package*. Geneva: World Health Organization; 2003.
- 498 13. Evans-Lacko S, DosReis S, Kastelic E, Riley A. Mental Health Service Use Before and  
499 After Diagnosis of Early-Onset Bipolar Disorder. *J Behav Health Serv Res*. 2011;38:  
500 398–413. doi:10.1007/s11414-010-9225-8
- 501 14. Knapp M, Snell T, Healey A, Guglani S, Evans-Lacko S, Fernandez J-L, et al. How do  
502 child and adolescent mental health problems influence public sector costs?  
503 Interindividual variations in a nationally representative British sample. *J Child Psychol*  
504 *Psychiatry*. 2015;56: 667–676. doi:10.1111/jcpp.12327
- 505 15. Beecham J, Green J, Jacobs B, Dunn G. Cost variation in child and adolescent  
506 psychiatric inpatient treatment. *Eur Child Adolesc Psychiatry*. 2009;18: 535–542.  
507 doi:10.1007/s00787-009-0008-9
- 508 16. Gronholm PC, Ford T, Roberts RE, Thornicroft G, Laurens KR, Evans-Lacko S.  
509 Mental Health Service Use by Young People: The Role of Caregiver Characteristics.  
510 *PLoS One*. 2015;10: e0120004. doi:10.1371/journal.pone.0120004
- 511 17. Clement S, Schauman O, Graham T, Maggioni F, Evans-Lacko S, Bezborodovs N, et  
512 al. What is the impact of mental health-related stigma on help-seeking? A systematic  
513 review of quantitative and qualitative studies. *Psychol Med*. 2015;45: 11–27.  
514 doi:10.1017/S0033291714000129
- 515 18. Kamaradova D, Latalova K, Prasko J, Kubinek R, Vrbova K, Krnacova B, et al.  
516 Connection between self-stigma, adherence to treatment, and discontinuation of  
517 medication. *Patient Prefer Adherence*. 2016;10: 1289–1298. doi:10.2147/PPA.S99136
- 518 19. Horton S, Toledo ED la C, Mahon J, Santelli J, Waldfogel J. Identifying an Essential  
519 Package for Adolescent Health: Economic Analysis. *Child and Adolescent Health and*  
520 *Development*. Washington, D.C.: The World Bank; 2017. doi:10.1596/978-1-4648-  
521 0423-6\_ch26
- 522 20. Fatori D, Salum G, Itria A, Pan P, Alvarenga P, Rohde LA, et al. The economic impact  
523 of subthreshold and clinical childhood mental disorders. *J Ment Heal*. 2018;27: 588–  
524 594. doi:10.1080/09638237.2018.1466041
- 525 21. Paula CS, Bordin IAS, Mari JJ, Velasque L, Rohde LA, Coutinho ESF. The Mental  
526 Health Care Gap among Children and Adolescents: Data from an Epidemiological

- 527 Survey from Four Brazilian Regions. PLoS One. 2014;9: e88241.  
528 doi:10.1371/journal.pone.0088241
- 529 22. Ministério da Educação. Notas Estatísticas Censo Escolar 2018. 2019 [cited 20 Sep  
530 2019]. Available:  
531 [http://download.inep.gov.br/educacao\\_basica/censo\\_escolar/notas\\_estatisticas/2018/notas\\_estatisticas\\_censo\\_escolar\\_2018.pdf](http://download.inep.gov.br/educacao_basica/censo_escolar/notas_estatisticas/2018/notas_estatisticas_censo_escolar_2018.pdf)  
532
- 533 23. Agência Nacional de Saúde Suplementar. Beneficiários de planos privados de saúde,  
534 por cobertura assistencial (Brasil – 2010-2020). 2020 [cited 15 Apr 2020]. Available:  
535 <http://www.ans.gov.br/index.php/aans/quem-somos/227-dados-gerais>
- 536 24. Paula CS, Lauridsen-Ribeiro E, Wissow L, Bordin I a. S, Evans-Lacko S. How to  
537 improve the mental health care of children and adolescents in Brazil: Actions needed in  
538 the public sector. *Rev Bras Psiquiatr.* 2012;34: 334–341. doi:10.1016/j.rbp.2012.04.001
- 539 25. Salum GA, Gadelha A, Pan PM, Moriyama TS, Graeff-Martins AS, Tamanaha AC, et  
540 al. High risk cohort study for psychiatric disorders in childhood: rationale, design,  
541 methods and preliminary results. *Int J Methods Psychiatr Res.* 2015;24: 58–73.  
542 doi:10.1002/mpr.1459
- 543 26. Weissman MM, Wickramaratne P, Adams P, Wolk S, Verdeli H, Olfson M. Brief  
544 Screening for Family Psychiatric History: The Family History Screen. *Arch Gen  
545 Psychiatry.* 2000;57: 675–682. doi:10-1001/pubs.Arch Gen Psychiatry-ISSN-0003-  
546 990x-57-7-yoa8214
- 547 27. Associação Brasileira de Empresas de Pesquisa. Critério de Classificação Econômica  
548 Brasil. 2018 [cited 15 Apr 2020]. Available: <http://www.abep.org/criterio-brasil>
- 549 28. Goodman R, Ford T, Richards H, Gatward R, Meltzer H. The Development and Well-  
550 Being Assessment: description and initial validation of an integrated assessment of  
551 child and adolescent psychopathology. *J Child Psychol Psychiatry.* 2000;41: 645–55.
- 552 29. Fleitlich-Bilyk B, Goodman R. Prevalence of Child and Adolescent Psychiatric  
553 Disorders in Southeast Brazil. *J Am Acad Child Adolesc Psychiatry.* 2004;43: 727–  
554 734. doi:10.1097/01.chi.0000120021.14101.ca
- 555 30. Sourander A, Helstelä L, Helenius H. Parent-adolescent agreement on emotional and  
556 behavioral problems. *Soc Psychiatry Psychiatr Epidemiol.* 1999;34: 657–663.  
557 doi:10.1007/s001270050189
- 558 31. Salbach-Andrae H, Klinkowski N, Lenz K, Lehmkuhl U. Agreement between youth-  
559 reported and parent-reported psychopathology in a referred sample. *Eur Child Adolesc  
560 Psychiatry.* 2009;18: 136–143. doi:10.1007/s00787-008-0710-z
- 561 32. Martel MM, Pan PM, Hoffmann MS, Gadelha A, do Rosário MC, Mari JJ, et al. A  
562 general psychopathology factor (P factor) in children: Structural model analysis and  
563 external validation through familial risk and child global executive function. *J Abnorm  
564 Psychol.* 2017;126: 137–148. doi:10.1037/abn0000205
- 565 33. Stringaris A, Goodman R. The Value of Measuring Impact Alongside Symptoms in  
566 Children and Adolescents: A Longitudinal Assessment in a Community Sample. *J  
567 Abnorm Child Psychol.* 2013;41: 1109–1120. doi:10.1007/s10802-013-9744-x



- 568 34. Evans-Lacko S, Rose D, Little K, Flach C, Rhydderch D, Henderson C, et al.  
569 Development and psychometric properties of the Reported and Intended Behaviour  
570 Scale (RIBS): a stigma-related behaviour measure. *Epidemiol Psychiatr Sci.* 2011;20:  
571 263–271. doi:10.1017/S2045796011000308
- 572 35. Ribeiro WS, Gronholm PC, Silvestre de Paula C, Hoffmann MS, Rojas Vistorte AO,  
573 Zugman C, et al. Development and validation of the Brazilian Portuguese Version of  
574 the Reported and Intended Behaviour Scale (RIBS-BP). *Stigma Heal.* 2020;In press.  
575 doi:10.1037/sah0000224
- 576 36. Hoagwood K, Horwitz S, Stiffman A, Weisz J, Bean D, Rae D, et al. Concordance  
577 Between Parent Reports of Children’s Mental Health Services and Service Records:  
578 The Services Assessment for Children and Adolescents (SACA). *J Child Fam Stud.*  
579 2000;9: 315–331. doi:10.1023/A:1026492423273
- 580 37. Horwitz SM, Hoagwood K, Stiffman AR, Summerfeld T, Weisz JR, Costello EJ, et al.  
581 Reliability of the Services Assessment for Children and Adolescents. *Psychiatr Serv.*  
582 2001;52: 1088–1094.
- 583 38. Banco Central do Brasil. Conversor de moedas. 2018 [cited 10 Oct 2019]. Available:  
584 <https://www.bcb.gov.br/conversao>
- 585 39. Razzouk D. Accommodation and Health Costs of Deinstitutionalized People with  
586 Mental Illness Living in Residential Services in Brazil. *PharmacoEconomics - Open.*  
587 2019;3: 31–42. doi:10.1007/s41669-018-0078-z
- 588 40. Becker P, Razzouk D. Cost of a community mental health service: a retrospective study  
589 on a psychosocial care center for alcohol and drug users in São Paulo. *Sao Paulo Med*  
590 *J.* 2018;136: 433–441. doi:10.1590/1516-3180.2018.0164310818
- 591 41. Banco Central do Brasil. Calculadora do Cidadão. Correção de valores. 2018 [cited 10  
592 Sep 2019]. Available: <https://www3.bcb.gov.br/CALCIDADA0>
- 593 42. Mihaylova B, Briggs A, O’Hagan A, Thompson SG. Review of statistical methods for  
594 analysing healthcare resources and costs. *Health Econ.* 2011;20: 897–916.  
595 doi:10.1002/hec.1653
- 596 43. Villatoro AP, DuPont-Reyes MJ, Phelan JC, Painter K, Link BG. Parental recognition  
597 of preadolescent mental health problems: Does stigma matter? *Soc Sci Med.* 2018;216:  
598 88–96. doi:10.1016/j.socscimed.2018.09.040
- 599 44. Blair C, Raver CC. Poverty, Stress, and Brain Development: New Directions for  
600 Prevention and Intervention. *Acad Pediatr.* 2016;16: S30–S36.  
601 doi:10.1016/j.acap.2016.01.010
- 602 45. Alegria M, Vallas M, Pumariega AJ. Racial and Ethnic Disparities in Pediatric Mental  
603 Health. *Child Adolesc Psychiatr Clin N Am.* 2010;19: 759–774.  
604 doi:10.1016/j.chc.2010.07.001
- 605 46. Leslie LK, Weckerly J, Landsverk J, Hough RL, Hurlburt MS, Wood PA.  
606 Racial/Ethnic Differences in the Use of Psychotropic Medication in High-Risk  
607 Children and Adolescents. *J Am Acad Child Adolesc Psychiatry.* 2003;42: 1433–1442.  
608 doi:10.1097/00004583-200312000-00010

- 609 47. Knapp M, Ardino V, Brimblecombe N, Evans-Lacko S, Lemmi V, King D, et al. Youth  
610 mental health: new economic evidence. London: Personal Social Services Research  
611 Unit; 2016.
- 612 48. Ministério da Educação. Decreto N° 7.611. 2011 [cited 20 Sep 2019]. Available:  
613 [http://www.planalto.gov.br/ccivil\\_03/\\_Ato2011-2014/2011/Decreto/D7611.htm#art11](http://www.planalto.gov.br/ccivil_03/_Ato2011-2014/2011/Decreto/D7611.htm#art11)
- 614 49. Thornicroft G, Mehta N, Clement S, Evans-Lacko S, Doherty M, Rose D, et al.  
615 Evidence for effective interventions to reduce mental-health-related stigma and  
616 discrimination. *Lancet*. 2016;387: 1123–1132. doi:10.1016/S0140-6736(15)00298-6
- 617

## 618 **Supporting information**

619 **S1 Fig. Flow chart of Brazilian High-Risk Cohort participants included in the mental-**  
620 **health related service use study.**

621 **S1 Table. Unit costs of health, educational, social care and criminal justice related**  
622 **services.**

623 **S2 Table. Bivariate analysis: Predictors of 12-month mental health service utilisation.**

624 **S3 Table. Bivariate analysis: Predictors of cost of mental health service use in the last 12**  
625 **months.**

626 **S4 Table. Logistic regression models: 12-month mental health service utilisation**  
627 **predicted by psychiatric diagnosis trajectories.**

628 **S5 Table. Logistic regression models: 12-month mental health service utilisation**  
629 **predicted by impact of behavioural and emotional difficulties on child' life.**

630 **S6 Table. Logistic regression models: 12-month mental health service utilisation**  
631 **predicted by parental stigma.**

632 **S7 Table. Generalised linear models: cost of 12-month mental health service utilization**  
633 **predicted by psychiatric diagnosis trajectories.**

634 **S8 Table. Generalised linear models: cost of 12-month mental health service utilisation**  
635 **predicted by impact of behavioural and emotional difficulties on child' life.**

636 **S9 Table. Generalised linear models: cost of 12-month mental health service utilisation**  
637 **predicted by parental stigma.**

638 **S10 Table. Generalised linear models: cost of 12-month mental health service utilisation**  
639 **predicted by broad diagnosis categories.**

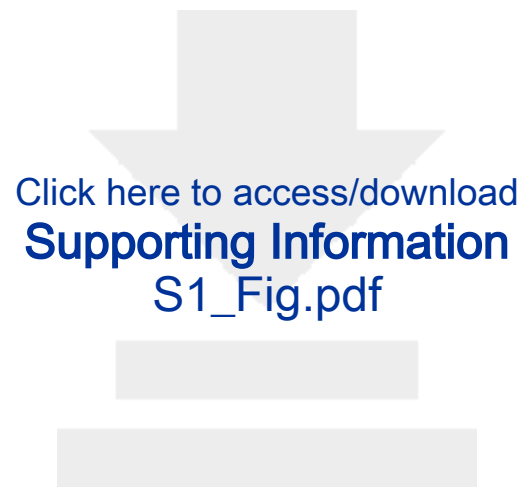

Click here to access/download  
**Supporting Information**  
S1\_Fig.pdf

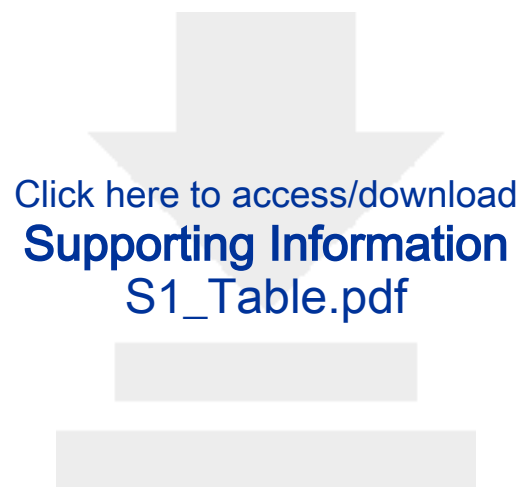

Click here to access/download  
**Supporting Information**  
S1\_Table.pdf

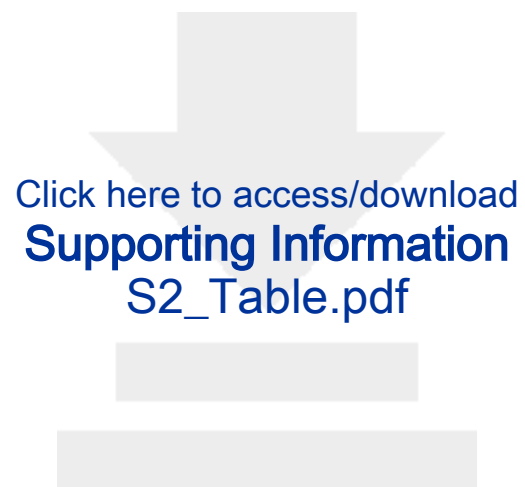

Click here to access/download  
**Supporting Information**  
S2\_Table.pdf

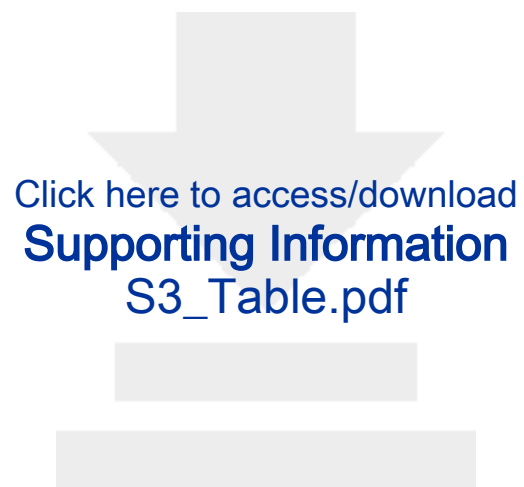

Click here to access/download  
**Supporting Information**  
S3\_Table.pdf

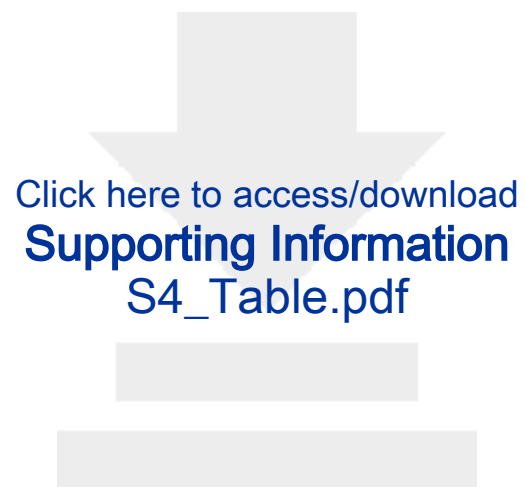

Click here to access/download  
**Supporting Information**  
S4\_Table.pdf

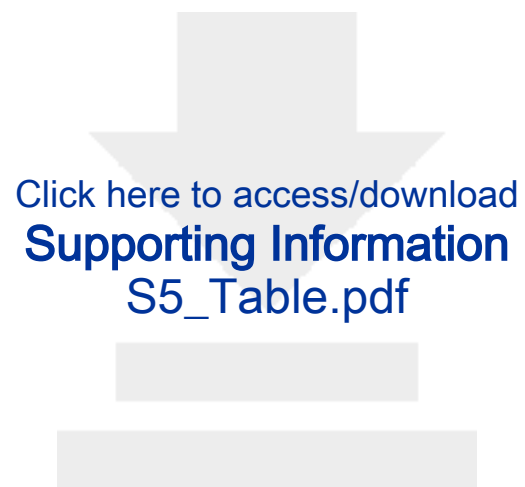

Click here to access/download  
**Supporting Information**  
S5\_Table.pdf



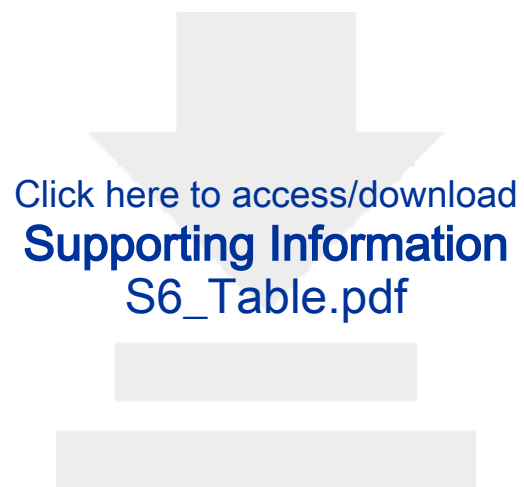

Click here to access/download  
**Supporting Information**  
S6\_Table.pdf

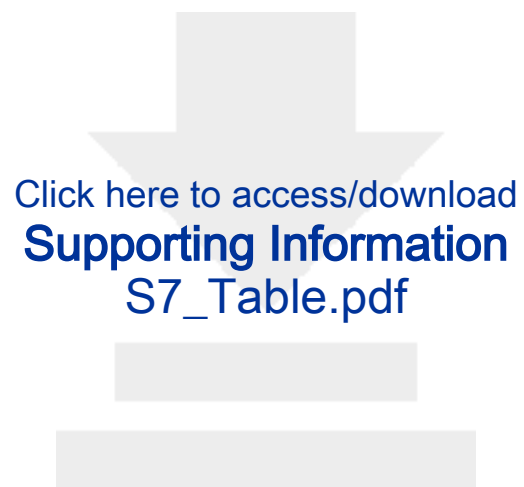

Click here to access/download  
**Supporting Information**  
S7\_Table.pdf

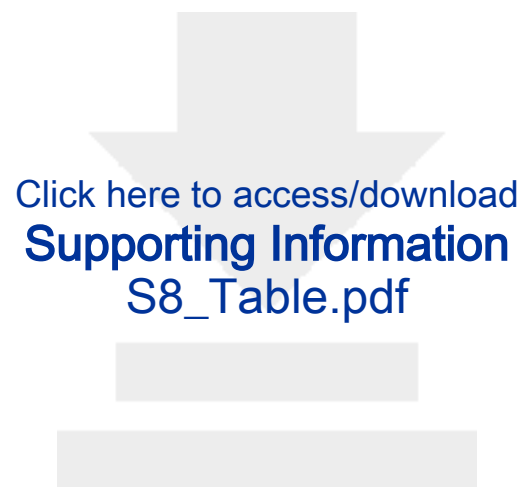

Click here to access/download  
**Supporting Information**  
S8\_Table.pdf

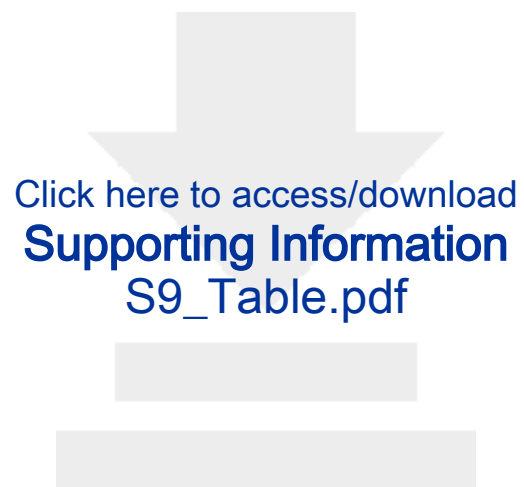

Click here to access/download  
**Supporting Information**  
S9\_Table.pdf

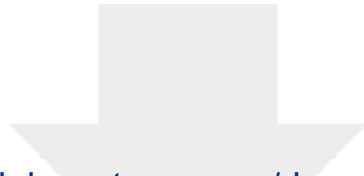

Click here to access/download  
**Supporting Information**  
S10\_Table.pdf

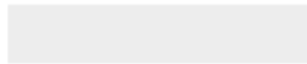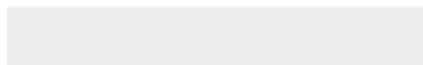

## Utilisation and costs of mental health-related service use among adolescents

Carolina Ziebold, ~~PhD~~<sup>1</sup>, Wagner Ribeiro, ~~PhD~~<sup>1,2</sup>, Derek King, ~~PhD~~<sup>2</sup>, David McDaid, ~~MSe~~<sup>2</sup>,  
Mauricio Hoffmann, ~~PhD~~<sup>2,3,4,5</sup>, Renee Romeo, ~~PhD~~<sup>6</sup>, Pedro Pan, ~~PhD~~<sup>1,5</sup>, Euripides Miguel,  
~~PhD~~<sup>5,7</sup>, Rodrigo Bressan, ~~PhD~~<sup>1,5</sup>, Luis Augusto Rohde, ~~PhD~~<sup>5,8,9</sup>, Giovanni Salum, ~~PhD~~<sup>5,9,8</sup>, Jair  
Mari, ~~PhD~~<sup>1,5</sup>, and Sara Evans-Lacko, ~~PhD~~<sup>2\*</sup>

<sup>1</sup> ~~Departamento de Psiquiatria Universidade Federal de São Paulo, Departamento de Psiquiatria,~~  
Universidade Federal de São Paulo, São Paulo, Brazil

<sup>2</sup> Care Policy and Evaluation Centre, London School of Economics and Political Science,  
London, United Kingdom

<sup>3</sup> Universidade Federal de Santa Maria, Santa Maria, Brazil

<sup>4</sup> Hospital de Clínicas de Porto Alegre, Porto Alegre, Brazil

<sup>5</sup> National Institute of Developmental Psychiatry for Children and Adolescents, São Paulo,  
Brazil

<sup>6</sup> King's College London, London, United Kingdom

<sup>7</sup> Universidade de São Paulo, São Paulo, Brazil

<sup>8</sup> ~~ADHD Outpatient Program & Developmental Psychiatry Program, Hospital de Clínicas de~~  
~~Porto Alegre, Brazil.~~

<sup>9</sup> Universidade Federal do Rio Grande do Sul, Porto Alegre, Brazil

\*Corresponding author: ~~Sara Evans Lacko, Care Policy and Evaluation Centre, London~~  
~~School of Economics and Political Science.~~ Email: S.Evans-Lacko@lse.ac.uk ([SEL](#))

## 25 **Abstract**

26 **Background:** The high burden of care for adolescents with mental health disorders represents  
27 a challenge to the public sector, especially in low and middle-income countries. We aimed to  
28 estimate the costs to the public purse of health, education, criminal justice and social care  
29 service use associated with psychiatric disorders among adolescents in Brazil; and to examine  
30 whether the trajectory of psychopathology and its impact on daily life, and parental stigma  
31 towards mental illness, may be associated with service utilisation and costs.

32 **Methods:** Data on reported service use among adolescents from a prospective community  
33 cohort (n=1,400) were combined with Brazilian unit costs. Logistic regression and generalised  
34 linear models were used to examine predictors of service use and associated costs, respectively.

35 **Results:** Twenty-two percent of those who presented with a psychiatric disorder used some type  
36 of service for their mental health in the previous twelve months. Higher odds of service use  
37 were associated with having ~~an incident~~ diagnosed mental disorder (either incident,  
38 ~~[(OR=2.49, 95%CI=1.44-4.30, p=0.001)],~~ remittent ~~[(OR=2.16, 95%CI=1.27-3.69, p=0.005)]~~  
39 ~~or persistent [(OR=3.01, 95%CI=1.69-5.36, p<0.001)]~~ ~~psychiatric disorder~~, higher impact of  
40 symptoms on adolescent's life (OR=1.32, 95%CI=1.19-1.47, p<0.001) and lower parental  
41 stigma toward mental illness (OR=1.12, 95%CI=1.05-1.20, p=0.001). Average annual cost of  
42 service use was 527.14 USD (s.d.= 908.10). Higher cost was predicted by higher disorder  
43 impact ( $\beta=0.25$ , 95%CI=0.12-0.39, p<0.001), lower parental stigma ( $\beta=0.12$ ,  
44 95%CI=0.02–0.23, p=0.020) and white ethnicity ( $\beta=0.55$ , 95%CI=0.04–1.07, p=0.036).

45 **Conclusion:** The impact of emotional and behavioural symptoms on adolescents' lives and  
46 parental stigmatising attitudes toward mental illness were the main predictors both of service  
47 use and costs.

48 **Key words:** Service Utilisation, Mental Health, Adolescence, Health Economics

## 49 Introduction

50 Mental health conditions affect 13.4% of children and adolescents globally, representing  
51 the leading cause of disability in this age group [1]. They can have long-term impacts on health  
52 and social outcomes into adulthood [2–7]. The high prevalence and potentially enduring nature  
53 of these impacts make addressing youth mental health conditions particularly important, but  
54 this is a challenge for public systems with limited resources [8]. ~~Provision of mental health~~  
55 ~~care~~ Economic costs associated with youth mental health conditions- involve a wide range of  
56 sectors including health, educational, social care, and criminal justice services [9,10]. This can  
57 represent a substantial cost to the public purse, yet it could also be considered a wise investment  
58 given the evidence that effective treatment can mitigate the impact of poor mental health [2].  
59 Estimating the economic cost of mental disorders in young people from the perspective of the  
60 public purse and understanding which factors are associated with these costs could support  
61 more effective and efficient policy planning and care delivery [8,11,12].

62 Some studies from high-income countries suggest that ~~male gender, older age and~~ lower  
63 socioeconomic status, as well as clinical features (illness severity and impact of disorders) are  
64 associated with use of health, special education, and social care services, while male gender  
65 and older age and are associated with more criminal justice services contacts [11,13,14]. These  
66 sociodemographic and clinical characteristics are also and greater-associated with greater  
67 mental health-related treatment costs among young people [11,14,15]. Families also play a  
68 central role in young people's contact with services. One study from the UK found that lower  
69 mental illness-related stigma among caregivers was associated with an increased likelihood of  
70 young people's mental health service use [16]. Stigmatising attitudes toward mental illness  
71 amongst parents may influence service contacts due to shame and fears of labelling their child's  
72 mental health condition [16]. However, little is known about how parental stigma could impact

Formatted: Font color: Red



73 ~~on costs which also reflect intensity of service use.~~ There are clear links between stigma and  
74 reduced ~~Studies among adults suggest that stigma reduces help-seeking [17], and increases non-~~  
75 reduced ~~adherence to treatment and early withdrawal from services [17,18].~~ However, little is  
76 known about how parental stigma could impact on young people service use and costs which  
77 also reflect intensity of service use.

78 Most costing studies have focused on a single disorder, commonly autism, attention  
79 deficit hyperactivity disorder or conduct disorders [10]. Additionally, little is known about how,  
80 beyond in addition to the type of diagnosis disorder, whether persistence of psychopathology  
81 from childhood to adolescence, ~~and~~ disorders' impact on adolescent's daily life (i.e.  
82 functioning), in addition to and key barriers to care such as stigma, could influence costs.

Formatted: Font color: Red

Formatted: Font color: Red

83 There are a limited number of studies reporting on prevalence of mental health service  
84 use in low and middle-income countries (LMICs) [19–21], however, none use validated service  
85 use measures. Moreover, prevalence of any use does not capture the intensity of use (e.g.  
86 number or type of visits) needed to understand the economic impact of child mental health  
87 problems. From a global mental health perspective, examining this issue in a LMIC context,  
88 where resources are scarce, is of major significance. ~~Similar to most high income countries,~~  
89 Brazil provides universal access to health services and education for the entire population that  
90 is free at the point of use, while private health care and education are used by about 20% of the  
91 population [22–24]. Estimating the economic cost of mental disorders among young people to  
92 the public purse, and understanding which factors are associated with these costs in Brazil is  
93 essential for public policy planning, specifically to optimise investment. This approach could  
94 also be of value for similar health and welfare systems.

95 Furthermore, examining the variation in costs according to clinical characteristics of  
96 adolescents, beyond type of diagnosis, is important as the impact of psychopathology on daily

107 life and the trajectory of psychopathology from childhood to adolescence, may support service  
108 planning and resource allocation in relation to clinical characteristics in a preventive and  
109 responsive way.

110 The aim of this study is to estimate the costs associated with health, education, criminal  
111 justice and social care services among a cohort of young people in Brazil. We first present the  
112 annual aggregate cost to the public purse and then disaggregate this impact to reflect and  
113 understand the relative costs to different sectors. Second, we examine how costs vary according  
114 to: ~~mental health, child trajectories, impact of the disorder on everyday life, and parent/guardian~~  
115 ~~stigma towards mental illness characteristics~~. We hypothesise that persistence of psychiatric  
116 disorders from childhood to adolescence and associated impact on adolescents' lives have the  
117 greatest influence on costs. However, we also expect that lower levels of parental stigma  
118 towards mental illness will predict greater likelihood of service use and hence higher costs.

## 109 **Methods**

### 110 **Data and participants**

111 This study is nested within the Brazilian High-Risk Cohort (BHRC), which is an  
112 ongoing prospective longitudinal study that comprises a community sample and a high-risk sub-  
113 sample (a sample ~~with children at~~ increased risk of mental disorders) of young people from Sao  
114 Paulo and Porto Alegre, Brazil, ~~who were six to twelve years old at baseline (2010-2011,~~  
115 ~~n=2,511).~~ A detailed description of the sample and procedures can be found elsewhere [25].  
116 ~~Briefly, during the registry day, 12,500 parents of young people aged 6 to 14 years attending~~  
117 ~~57 schools (22 in Porto Alegre and 35 in São Paulo) were invited to a screening of mental health~~  
118 ~~disorders using the Family History Screen (FHS) [26]. A total of 8,012 families (9,937 eligible~~  
119 ~~children, 45,394 family members) were interviewed. Based on the percentage of members in~~

Formatted: Font color: Red

Formatted: Font color: Red

Formatted: Font color: Red

120 the family that screened positively for psychiatric disorders, an index of family load for each  
121 potential eligible child was computed. The final cohort comprised 2,511 young people; 957  
122 were randomly selected, and 1,554 were a sub-sample at increased risk of mental disorders  
123 based on the FHS. Cohort participants were interviewed at baseline (aged 6-14 years, calendar  
124 year:2010-2011, n=2,511), and at first follow-up (N=2010, aged 9-17 years, calendar year  
125 2014).

126 After completing the BHRC first follow-up interview~~(2014-2015, child participants~~  
127 ~~aged 10-18 years)~~, 1,881 parents/guardians were invited to respond to a comprehensive  
128 supplementary interview which included a comprehensive assessment of mental health related  
129 service use (calendar year: 2014-2015, young people participants aged 10-18 years). Among  
130 those contacted, 1,400 (74.4%) guardians (in 93.1% of cases the biological mother) completed  
131 the interview –982 (70.1%) by telephone and 418 (29.9%) face-to-face– (See flow chart in S1  
132 Fig.). There were no significant differences in persistence of psychopathology or impact of  
133 psychopathology on adolescents’ lives among respondents versus non-respondents.

134 This research was carried out in accordance with the latest version of the Declaration of  
135 Helsinki. ~~Child assent and P~~parental written informed consent was obtained from all the  
136 research subjects. Young people provided verbally informed assent (documented as part of the  
137 consent form, and witnessed by the interviewer), and those who were able to read and write  
138 also provided written consent. All procedures were approved by the Ethics Committee of the  
139 Federal University of São Paulo-UNIFESP (Nº 2.879.533 and –CAAE 06457219.9.0000.5505),  
140 Hospital de Clínicas de Porto Alegre (CAAE 06457219.9.3001.5327) and the European  
141 Research Commission. ▲

142 Data were provided by the Brazilian High-Risk Cohort study and are available upon  
143 request in the Open Science Framework public repository (<https://osf.io/ktz5h/>).

Formatted: Font color: Red

Formatted: Font color: Red

144

## 145 **Measures**

### 146 **Sociodemographic Characteristics**

147 Data on the following sociodemographic characteristics were collected: gender, age at follow-  
148 up, ethnicity (white and non-white: black, Asian, indigenous or mixed-race), socioeconomic  
149 group (SEG), and maternal educational level (no/basic, secondary or university education).  
150 SEG was defined according to a Brazilian standardized questionnaire [27]. Based on families’  
151 assets and head of household’s education level, a total score ranging for 0 to 46 is given, where  
152 greater scores represent higher socioeconomic status. In this study, SEG was categorised as  
153 “low” (0-22) and “high” (23-46).

154

### 155 **Psychopathology**

156

157 **Psychiatric diagnosis:** Psychiatric diagnoses were assessed at baseline and follow-up using the  
158 Brazilian-Portuguese version of the Development and Well-being Assessment (DAWBA)  
159 [28,29], which is a highly structured interview used to generate DSM-IV diagnoses. Trained  
160 interviewers gathered information on current problems causing significant distress or social  
161 impairment. At baseline, diagnostic assessment and interviews were performed with guardians  
162 only. Previous literature has found that self-report on internalising conditions during  
163 adolescence is higher compared with parental report. This can be explained because  
164 internalising problems, such as anxiety or depression, would be less observable by guardians,  
165 being advisable to consider both reports to reach a reliable evaluation of adolescent mental  
166 health [30,31]. For this reason, diagnostic assessment at 3-year follow-up. At 3-year follow-up,  
167 diagnostic assessment was performed considering guardian reports and additional information

168 from interviews with the young people about internalising conditions. Computerised diagnostic  
169 probabilities were then generated based on responses those were carefully evaluated by 9  
170 trained psychiatrists who determined the diagnosis.

171

172 **Broad psychiatric diagnostic categories:** Based on previous literature [32], follow-up  
173 DAWBA diagnoses were grouped into three broad categories: distress-related disorders  
174 (including depression, generalised anxiety disorder, obsessive – compulsive disorder, tic, eating  
175 disorder), fear-related disorders (including panic, agoraphobia, social anxiety, specific phobia  
176 and separation anxiety) and externalising disorders (including conduct disorder, oppositional  
177 defiant disorder and attention deficit/hyperactivity disorder).

178

179 **Persistence of diagnosis:** Four categories of diagnostic persistence were created based on  
180 presence of diagnosis at baseline and/or follow-up: 1) no diagnosis (no diagnosis at both time  
181 points), 2) incident (no diagnosis at baseline and presence of diagnosis at follow-up), 3)  
182 remittent (presence of diagnosis at baseline and no diagnosis at follow-up), 4) persistent  
183 (presence of diagnosis at both time points).

184

185 **Impact of mental health problems at follow-up:** was measured according to the ‘impact  
186 supplement’ of the Strength and Difficulties Questionnaire (SDQ) which is part of DAWBA.

187 This supplement assesses the impact of behavioural and emotional difficulties on ~~children’s~~  
188 adolescent’s lives according to guardian reports. A total score (0-10) was generated by summing  
189 5 items: distress, social impairment in family life, friendships, learning, and leisure activities  
190 [33]. Higher scores represent greater impact. The impact score has demonstrated internal  
191 consistency, cross-informant correlations, and stability measured across time [33].

192

### 193 **Parent-reported stigma towards mental health problems**

194 To assess parental stigma, we applied the Brazilian Portuguese version of the Reported  
195 and Intended Behaviour Scale (RIBS-BP) [34,35]. The intended behaviour subscale assesses  
196 future intended stigmatising behaviour across four domains: living with, working with, living  
197 nearby and continuing a relationship with someone with a mental health problem. Higher scores  
198 represent lower stigma. The RIBS-BP has demonstrated good internal consistency, and good to  
199 excellent construct validity [35].

200

### 201 **Service use**

202 The Service Assessment for Children and Adolescents (SACA) [36] was used to ask  
203 guardians about service contacts made in the past 12 months in response to concerns regarding  
204 their child's emotions and behaviour, including alcohol and drugs. The SACA assesses type,  
205 nature, frequency and duration of services used, treatments received and settings in which  
206 services were delivered. Overall concordance between parent report and records ( $\kappa=0.76$ )  
207 [36] and test-retest reliability for 12-month ( $\kappa=0.75-0.86$ ) service use on the parent version  
208 of the SACA is strong [37].

209 We received permission from the SACA developers to translate and adapt the  
210 instrument to the Brazilian context in consultation with experts in the Brazilian mental health  
211 system to ensure we covered the relevant service types and settings in Brazil. The list of services  
212 and professionals was grouped into three sectors: 1) health care: inpatient services (psychiatric  
213 hospital, psychiatric unit in a general hospital, alcohol and drug clinic); outpatient services  
214 (Centre for psychosocial care [CAPS], which are the community mental health services in  
215 Brazil; mental health clinics; specialist mental health professionals (psychiatrists and

216 psychologists in settings other than CAPS and mental health clinics); general health services  
217 and professionals (emergency room, paediatrician, general practitioner [GP] or family doctor);  
218 2) education: special school and special education in regular school (special room and special  
219 needs class assistant); 3) social care and criminal justice: overnight stay in a shelter or detention  
220 centre; probation programme contact; and home visit of the guardianship council (services  
221 responsible for child-rights protection).

222

### 223 **Estimation of costs**

224 Data collected on use of services from the BHRC were combined with unit costs to  
225 derive service use costs in Brazilian Reals for the financial year 2018 and then converted to US  
226 dollars (based on December 31 2018 conversion rate 1 Real=0.2581 dollars, according to the  
227 Brazilian Central Bank) [38].

228 **Unit costs:** Detailed information on source of information and unit cost values for each service  
229 is available in S1 Table. Where available, we applied unit costs previously reported in the  
230 Brazilian literature [39,40]. However, as costs of many services have not previously been  
231 reported, we performed a thorough consultation process gathering relevant data from public  
232 databases of the Ministries of Education and Health, and the social care departments of the  
233 municipalities of Porto Alegre and São Paulo (S1 Table).

234 Unit costs were attached to data on service use frequencies for each type of service  
235 (based on the SACA) based on 2018 prices or the latest available year converted to 2018 prices  
236 using the Nationwide Consumer Price Index. The Brazil Central Bank's calculator was used to  
237 apply the index [41]. Once obtained, information on the unit cost of each service was used to  
238 calculate the total annual cost by sector (health, education, social care and criminal justice) for  
239 each participant by multiplying the frequency of use (e.g. number of visits, nights) by unit cost.

## 240 **Data Analysis**

241 Data were analysed using STATA, version 14. First, we described prevalence of socio-  
242 demographic and clinical characteristics overall and by persistence of psychopathology.  
243 Between-group differences were compared using chi-squared tests. For interval variables,  
244 means and standard deviations were calculated and overall significance was tested using one-  
245 way analysis of variance. A significance parameter of  $p < .05$  (two-tailed) was applied for all  
246 tests.

247 Unadjusted odds ratios and coefficients for each predictor and covariate in relation to  
248 mental health service use and costs are presented in S2 and S3 Tables. To compare the relative  
249 impact between our three main predictors (i.e., psychopathological trajectories, impact of the  
250 disorder and parental stigma) of service use and costs we also present logistic regression models  
251 for each of these variables adjusting for sociodemographic characteristics (gender, age,  
252 mother's education, ethnicity and SEG) and dummy variables (mode of data collection and city  
253 of residence) (S4-S6 Tables for service use and S7-S9 Tables for costs). We then used  
254 multivariable analyses to examine the association between guardian and adolescent  
255 characteristics with service use (logistic regression models) and associated costs (generalised  
256 linear models – GLM), overall and by sector: 1) health; 2) education; and 3) social care and  
257 criminal justice. All multivariable analyses were adjusted by socio-demographic characteristics,  
258 mode of data collection and city.

259 For costs GLM, we analysed the subset of participants who used services in the previous  
260 12 months (n=143). Annual costs for each participant were included in the models as a scalar  
261 dependent variable, with a Gamma distribution [42], using the log-link function.

## 262 **Results**



263 Table 1 describes sociodemographic and clinical characteristics of participants. The  
264 sample comprised 1,400 adolescents with a mean age of 14 years (s.d=1.98). The majority were  
265 white males from low SEG, and only 10% of mothers had university education. 23.3% (n=  
266 326) of adolescents had a psychiatric disorder in the previous 12 months, of which 177 (54.3%)  
267 were incident and 149 (45.7%) persistent cases since baseline. 213 (15.2%) participants had  
268 remitted from a baseline psychiatric diagnosis. Participants with externalising disorders were  
269 more likely to have persistent trajectories (RR=2.19, 95%CI=1.38-3.48, p<0.001). Participants  
270 categorised as persistent also reported greater disorder impact ( $\beta=2.34$ , 95%CI=2.11-2.58,  
271 p<0.001). 22.4% of those who presented with a psychiatric disorder reported using some type  
272 of service for their mental health in the previous twelve months. The proportion of service use  
273 among those who presented a persistent psychiatric condition was 27%. Table 1 also describes  
274 the mean costs of mental health-related service use in the past year, by psychiatric trajectory  
275 (from no diagnosis to persistent psychiatric diagnosis). Bivariate analyses showed a non-  
276 significant association between psychiatric trajectory and mean annual costs.

277

278 **Table 1. Sociodemographic and clinical characteristics by trajectories of psychopathology (n=1,400).**

|                                          | No psychiatric diagnosis<br>(n=861) | Incident psychiatric diagnosis<br>(n=177) | Remittent psychiatric diagnosis<br>(n=213) | Persistent psychiatric diagnosis<br>(n=149) | Overall sample<br>(n=1,400) |                  |
|------------------------------------------|-------------------------------------|-------------------------------------------|--------------------------------------------|---------------------------------------------|-----------------------------|------------------|
|                                          | N (%)                               | N (%)                                     | N (%)                                      | N (%)                                       | N (%)                       | p                |
| <i>Sociodemographic characteristics</i>  |                                     |                                           |                                            |                                             |                             |                  |
| Male gender                              | 503 (58.4)                          | 81 (45.8)                                 | 134 (62.9)                                 | 83 (55.7)                                   | 801 (57.2)                  | <b>0.005</b>     |
| Female gender                            | 358 (41.6)                          | 96 (54.2)                                 | 79 (37.1)                                  | 66 (44.3)                                   | 599 (42.8)                  |                  |
| Age, mean (s.d)                          | 14.50 (2.02)                        | 14.58 (1.90)                              | 14.39 (1.88)                               | 14.67 (1.99)                                | 14.51 (1.98)                | 0.564            |
| High SEG                                 | 359 (41.7)                          | 63 (35.6)                                 | 71 (33.3)                                  | 61 (40.9)                                   | 554 (39.6)                  | 0.095            |
| Low SEG                                  | 502 (58.3)                          | 114 (64.4)                                | 142 (66.7)                                 | 88 (59.1)                                   | 846 (60.4)                  |                  |
| White ethnicity                          | 484 (56.2)                          | 106 (60.2)                                | 116 (54.5)                                 | 84 (57.1)                                   | 790 (56.6)                  | 0.704            |
| Non-White ethnicity                      | 377 (43.8)                          | 70 (39.8)                                 | 97 (45.5)                                  | 63 (42.9)                                   | 607 (43.5)                  |                  |
| <i>Guardians characteristics</i>         |                                     |                                           |                                            |                                             |                             |                  |
| Maternal no/basic education              | 387 (45.1)                          | 78 (44.6)                                 | 96 (45.3)                                  | 59 (39.9)                                   | 620 (44.5)                  | 0.953            |
| Maternal secondary education             | 384 (44.8)                          | 78 (44.6)                                 | 93 (43.9)                                  | 71 (48.0)                                   | 626 (44.9)                  |                  |
| Maternal university education            | 87 (10.14)                          | 19 (10.9)                                 | 23 (10.9)                                  | 18 (12.2)                                   | 147 (10.6)                  |                  |
| <i>Clinical characteristics</i>          |                                     |                                           |                                            |                                             |                             |                  |
| Any Psychiatric Diagnosis                | -                                   | 177 (54.3)                                | -                                          | 149 (45.7)                                  | 326 (23.3)                  | <b>&lt;0.001</b> |
| Fear-related                             | -                                   | 92 (52.0)                                 | -                                          | 72 (48.3)                                   | 164 (11.7)                  | <b>&lt;0.001</b> |
| Distress-related                         | -                                   | 70 (40.0)                                 | -                                          | 60 (40.3)                                   | 130 (9.3)                   | <b>&lt;0.001</b> |
| Externalising                            | -                                   | 49 (27.7)                                 | -                                          | 68 (45.6)                                   | 117 (8.4)                   | <b>0.001</b>     |
| SDQ impact mean score (s.d)              | 0.28 (0.73)                         | 1.49 (1.91)                               | 0.78 (1.51)                                | 2.62 (2.41)                                 | 0.78 (1.52)                 | <b>&lt;0.001</b> |
| <i>Mental health-related service use</i> |                                     |                                           |                                            |                                             |                             |                  |
| 12-months service use                    | 43 (5.0)                            | 32 (18.0)                                 | 27 (12.7)                                  | 41 (27.5)                                   | 143 (10.21)                 | <b>&lt;0.001</b> |
| Mean service use costs USD\$ (s.d)       | 326.41 (395.53)                     | 581.90 (1360.19)                          | 644.35 (795.50)                            | 628.50 (901.02)                             | 527.14 (908.10)             | 0.400            |

279 Notes: Results in bold are significant. SEG, socioeconomic group; SDQ, Strength and Difficulties Questionnaire. 3 missing data in ethnicity variable, 10 missing data  
280 in maternal education variable.

281 **Frequency of mental health-related service use and annual service**  
282 **use costs**

283 Utilisation of mental health services in the previous 12 months and associated cost by  
284 type of service are presented in Table 2. Overall, 10.0% of the sample (n=143) used some sort  
285 of health, education, criminal justice or social care service for mental health problems.  
286 Disaggregating by sectors, the health sector had highest proportion of service users (9%), while  
287 the education and social care and criminal justice sectors were less frequently contacted with a  
288 1.8% and 1.3% of users respectively. ~~—Outpatient mental health services, most notably~~  
289 ~~psychologists and psychiatrists in settings other than community mental health clinics, were the~~  
290 ~~most prevalent~~ frequently used among all services/professionals. Inpatient services and  
291 ~~General health services such as GP/family doctor, paediatrician and emergency department,~~  
292 were less frequently used. In the education sector, school assistant was the most type of service  
293 used by young people, while guardianship council was the most frequently social care service  
294 contacted. The total cost of 12-month mental health-related service use for the public purse was  
295 70,110.23 USD. The sector that presented higher total annual cost was the health sector,  
296 followed by the education and finally the social care and criminal justice sectors. The services  
297 that generated the greatest total costs for the health sector were psychologist (11,339.64 USD)  
298 and CAPS (9,628.01 USD). Among those who used services, the average annual cost of service  
299 use amounted to 527.14 USD (SD= 908.10 USD, range=8.77- 7,605.58 USD, median=221.10  
300 USD, interquartile range=545.28) per user. ~~—Outpatient mental health services, most notably~~  
301 ~~psychologists and psychiatrists in settings other than community mental health clinics, were the~~  
302 ~~most prevalent among all services/professionals. General health services such as GP/family~~  
303 ~~doctor, paediatrician and emergency department, were less frequently used.~~ Individuals using  
304 CAPS (specialty mental health) services (1.1% of the sample) had the highest mean number of

305 visits during the previous year and the highest associated costs among health services. The  
306 second highest mean costs in the health sector were related to hospitalizations in -psychiatric  
307 hospitals and alcohol and drugs clinics, while the lowest mean costs were attributed to  
308 emergency department, paediatrician, outpatient alcohol and drugs and GP/family doctor  
309 contacts. Although only 0.1% of individuals used shelters, this type of social service had the  
310 highest associated mean cost. Education services were used by 1.8% of individuals and these  
311 services had the second highest associated mean costs.

312

313 **Table 2. 12-month mental health-related service use and costs by type of service (n = 143).**

|                                                                     | Users            | Number of visits/ nights | Number of nights/visits per user <sup>a,b</sup> | Total annual cost per service       | Annual cost per user                 |
|---------------------------------------------------------------------|------------------|--------------------------|-------------------------------------------------|-------------------------------------|--------------------------------------|
| Type of service                                                     | n (%)            | Total                    | Mean (Range; s.d.)                              | USD <sup>a</sup> USD <sup>a,b</sup> | Mean (Range; s.d.)                   |
| <b>Health Sector</b>                                                |                  |                          |                                                 |                                     |                                      |
| <i>Inpatient mental health services<sup>3</sup></i>                 |                  |                          |                                                 |                                     |                                      |
| Psychiatric hospital                                                | 7 (0.5)          | 73                       | 10.6 (1 – 30;11.87)                             | 4,015.72                            | 573.67 (66.42-1,992.72;691.76)       |
| Psychiatric unit in general hospital                                | 1 (0.1)          | 1                        | 1 (1)                                           | 40.49                               | 40.49                                |
| AD clinic                                                           | 3 (0.2)          | 48                       | 16 (6 – 27;10.73)                               | 1,767.90                            | 589.30 (191.87-1,096.36;462.10)      |
| <i>Outpatient mental health services</i>                            |                  |                          |                                                 |                                     |                                      |
| Centre for psychosocial care (CAPS)                                 | 15 (1.1)         | 452                      | 30.15(1-180;49.38)                              | 9,628.01                            | 740.62 (24.56-4,421.03;1212.73)      |
| Mental Health clinic                                                | 17 (1.2)         | 308                      | 18.13(1-70;19.08)                               | 5,644.64                            | 352.79 (19.46-1,362.50;371.28)       |
| Psychiatrist                                                        | 33 (2.4)         | 217                      | 6.56 (1-48;8.95)                                | 5,803.90                            | 181.37(27.64-1,326.60;247.29)        |
| Psychologist                                                        | 71 (5.1)         | 1,081                    | 15.23 (1-60;14.97)                              | 11,339.64                           | 171.81(11.28-676.99;168.91)          |
| AD clinic                                                           | 2 (0.1)          | 2                        | 1 (1)                                           | 14.74                               | 14.74                                |
| <i>General Health</i>                                               |                  |                          |                                                 |                                     |                                      |
| Emergency department                                                | 4 (0.3)          | 9                        | 2.25 (1-4;1.50)                                 | 156.0                               | 39.00 (17.34-69.34;26.00)            |
| Paediatrician                                                       | 3 (0.2)          | 10                       | 3.33 (2-4;1.16)                                 | 120.54                              | 40.18 (24.11-48.22;13.92)            |
| GP/family doctor                                                    | 5 (0.4)          | 23                       | 4.60 (2-9;2.97)                                 | 403.25                              | 80.65 (35.07-157.80;52.01)           |
| <i>Overall health service use</i>                                   | 126 (9.0)        |                          |                                                 | 37,679.94                           | 324.83 (11.28-4575.70;590.55)        |
| <b>Educational sector<sup>4</sup></b>                               |                  |                          |                                                 |                                     |                                      |
| Special School                                                      | 7(0.5)           |                          | School Year                                     | 8,564.92                            | 1,223.56 (1,155.72-1,250.70; 44.53)  |
| Special Class                                                       | 5 (0.4)          |                          | School Year                                     | 6,063.55                            | 1,212.71 (1,155.72-1,250.70; 52.02)  |
| School Assistant                                                    | 12 (0.9)         |                          | School Year                                     | 14,723.52                           | 1,226.96 (1,155.72-1,250.70; 42.95)  |
| <i>Overall education service use</i>                                | 23 (1.8)         |                          |                                                 | 29,351.94                           | 1,276.17 (1,155.72-2,501.40; 270.73) |
| <b>Social care and criminal justice sector</b>                      |                  |                          |                                                 |                                     |                                      |
| Shelter                                                             | 2 (0.1)          | 210                      | 105 (90-120;21.21)                              | 5,599.95                            | 2,799.98 (2,755.34-2,888.48; 63,12)  |
| Guardianship Council home visit                                     | 11 (0.8)         | 31                       | 2.85 (1-5;1.73)                                 | 201.84                              | 25.23 (8.77-43.87;15.15)             |
| Probation programme                                                 | 8 (0.6)          |                          | Six months                                      | 1,875.48                            | 234.44                               |
| <i>Overall social care and criminal justice related service use</i> | 18 (1.3)         |                          |                                                 | 4,687.47                            | 334.82 (8.77-2,888.48;1,155.72)      |
| <b>Overall service use</b>                                          | <b>143(10.2)</b> |                          |                                                 | <b>70,110.23</b>                    | <b>527.14 (8.77-7605.58; 908.10)</b> |

314 <sup>a</sup>Total cost health sector N=116, Total cost education sector, N=23, Total cost social care and criminal justice sector, N=14. Total cost, N=133. Cases with  
315 missing values in 'frequency of visits' were not included in costs estimates: CAPS=2, mental health clinic=1, psychiatrist=1, psychologist=5, AD clinic=1,  
316 guardianship council=3.

317 <sup>b</sup>Costs are expressed U.S. Dollars, 2018 prices. Brazilian Central Bank conversion rate: Brazilian Real=0.2581, December 31st 2018[38]

318 **Characteristics associated with mental health-related service use**

319           Having an incident, remittent or persistent psychiatric disorder, as well as the higher  
320 impact of behavioural and emotional difficulties on the adolescents' lives and lower parental  
321 stigma, all predicted higher odds of any 12-month service use (Table 3). Service contacts in the  
322 health sector were also predicted by the same factors. Service use in the educational sector was  
323 predicted by impact, lower parental stigma and low SEG. There were no factors significantly  
324 associated with use of social care and criminal justice services.

325

326

**Table 3. Multivariable logistic regression models: Predictors of 12-month mental health service utilisation (n=1,390<sup>a</sup>390<sup>a</sup>).**

| Predictors                              | Any service use                |                  | Health service use               |                  | Education service use           |                  | Social care and criminal justice service use |       |
|-----------------------------------------|--------------------------------|------------------|----------------------------------|------------------|---------------------------------|------------------|----------------------------------------------|-------|
|                                         | OR (95% CI)                    | p                | OR (95% CI)                      | p                | OR (95% CI)                     | p                | OR (95% CI)                                  | p     |
| <i>Sociodemographic characteristics</i> |                                |                  |                                  |                  |                                 |                  |                                              |       |
| Male gender (Ref)                       | -                              |                  | -                                |                  | -                               |                  | -                                            |       |
| Female gender                           | 0.87 (0.59-1.28)               | 0.488            | 0.98 (0.65-1.46)                 | 0.901            | 0.67 (0.24-.84)                 | 0.435            | 1.28 (0.48-3.40)                             | 0.627 |
| Age (in years)                          | 1.02 (0.92-1.12)               | 0.703            | 1.00 (0.90-1.11)                 | 0.942            | 0.98 (0.78-1.25)                | 0.886            | 1.25 (0.97-1.60)                             | 0.084 |
| High SEG (Ref)                          |                                |                  |                                  |                  |                                 |                  |                                              |       |
| Low SEG                                 | 1.30 (0.86-1.98)               | 0.211            | 1.11 (0.72-1.70)                 | 0.646            | <b>4.31 (1.29-14.39)</b>        | <b>0.018</b>     | 2.97 (0.75-11.77)                            | 0.122 |
| White ethnicity (Ref)                   | -                              |                  | -                                |                  | -                               |                  | -                                            |       |
| Non-White ethnicity                     | 1.17 (0.79-1.72)               | 0.442            | 0.97 (0.64-1.46)                 | 0.869            | 0.53 (0.19-1.48)                | 0.225            | 2.59 (0.92-7.28)                             | 0.071 |
| <i>Guardians characteristics</i>        |                                |                  |                                  |                  |                                 |                  |                                              |       |
| Maternal no/basic education (Ref)       | -                              |                  | -                                |                  | -                               |                  | -                                            |       |
| Maternal secondary education            | 1.23 (0.82-1.85)               | 0.315            | 1.30 (0.84-1.99)                 | 0.238            | 1.77 (0.66-4.78)                | 0.257            | 0.51 (0.17-1.54)                             | 0.233 |
| Maternal university education           | 1.14 (0.59-2.20)               | 0.698            | 1.17 (0.59-2.31)                 | 0.658            | 1.33 (0.24-7.53)                | 0.744            | 1.02 (0.19-5.54)                             | 0.981 |
| Lower parental stigma (RIBS scores)     | <b>1.12 (1.05-1.20)</b>        | <b>0.001</b>     | <b>1.11 (1.03-1.18)</b>          | <b>0.003</b>     | <b>1.22 (1.01-1.48)</b>         | <b>0.042</b>     | 1.01 (0.94-1.25)                             | 0.251 |
| <i>Clinical characteristics</i>         |                                |                  |                                  |                  |                                 |                  |                                              |       |
| No psychiatric diagnosis (Ref)          | -                              |                  | -                                |                  | -                               |                  | -                                            |       |
| Incident psychiatric diagnosis          | <b>2.49 (1.44-4.30)</b>        | <b>0.001</b>     | <b>2.57 (1.45-4.58)</b>          | <b>0.001</b>     | 2.29 (0.51-10.97)               | 0.281            | 2.54 (0.61-10.52)                            | 0.199 |
| Remittent psychiatric diagnosis         | <b>2.16 (1.27-3.69)</b>        | <b>0.005</b>     | <b>2.22 (1.25-3.93)</b>          | <b>0.006</b>     | 3.24 (0.84-12.50)               | 0.087            | 1.98 (0.45-8.75)                             | 0.369 |
| Persistent psychiatric diagnosis        | <b>3.01 (1.69-5.36)</b>        | <b>&lt;0.001</b> | <b>3.33 (1.82-6.08)</b>          | <b>&lt;0.001</b> | 2.82 (0.65-12.37)               | 0.168            | 3.65 (0.88-15.09)                            | 0.073 |
| SDQ impact score                        | <b>1.32 (1.19-1.47)</b>        | <b>&lt;0.001</b> | <b>1.32 (1.19-1.47)</b>          | <b>&lt;0.001</b> | <b>1.51 (1.24-1.84)</b>         | <b>&lt;0.001</b> | 1.22 (0.97-1.55)                             | 0.096 |
| Test statistics                         | LR $\chi^2(13)=129.35$ p<0.001 |                  | LR $\chi^2(13)=122.81$ , p<0.001 |                  | LR $\chi^2(13)=57.46$ , p<0.001 |                  | LR $\chi^2(13)=28.36$ , p=0.008              |       |
|                                         | Pseudo-R <sup>2</sup> =0.14    |                  | Pseudo-R <sup>2</sup> =0.15      |                  | Pseudo-R <sup>2</sup> =0.25     |                  | Pseudo-R <sup>2</sup> =0.15                  |       |

327

328

<sup>a</sup>From the total sample, N=1,400, 10 cases had missing data in mother's education and 3 in ethnicity variables. Results in bold are statistically significant (p<0.05). Models adjusted by collection instrument and city.

329

330 **Characteristics associated with greater mental health related**  
331 **service use costs**

332 When all three sectors were combined into a single total cost variable, greater impact,  
333 lower parental stigma and white ethnicity were associated with higher costs (Table 4). Each  
334 additional impact score predicted an increase in mean costs of 142.59 USD ( $p < 0.001$ ). For  
335 parental stigma, each additional RIBS-BP score (indicating lower stigma) increased mean cost  
336 by 69.32 USD ( $p = 0.020$ ). White ethnicity was associated with having higher mean costs of  
337 295.49 USD ( $p = 0.036$ ), compared with non-white participants. No association was found  
338 between broad diagnosis categories and costs (S10 Table).

339 When looking at predictors of costs according to sector, disorder impact was associated  
340 with greater health sector service use (predicted mean cost by each impact score = 66.26 USD,  
341  $p = 0.019$ ). We did not find any significant association of psychiatric trajectories, impact of  
342 disorder or parental stigma with education or social care/criminal justice sectors' costs.

343



344 **Table 4. Generalised linear models: parental and clinical characteristics associated with cost of mental health service use in the last 12 months,**  
 345 **overall and by sector.**

| Predictors                              | Any service use<br>N= 131                              |                  | Health service use<br>N=115                            |              | Education service use<br>N=22                          |       | Social care and criminal<br>justice service use N=14  |       |
|-----------------------------------------|--------------------------------------------------------|------------------|--------------------------------------------------------|--------------|--------------------------------------------------------|-------|-------------------------------------------------------|-------|
|                                         | $\beta$ (95%CI)                                        | p                | $\beta$ (95%CI)                                        | p            | $\beta$ (95%CI)                                        | p     | $\beta$ (95%CI)                                       | p     |
| <i>Sociodemographic characteristics</i> |                                                        |                  |                                                        |              |                                                        |       |                                                       |       |
| Male gender (Ref)                       | -                                                      |                  | -                                                      |              | -                                                      |       | -                                                     |       |
| Female gender                           | 0.05 (-0.50-0.59)                                      | 0.866            | 0.06 (-0.61-0.73)                                      | 0.854        | -0.03 (-0.29-0.24)                                     | 0.857 | 14.41 (-5.34-34.17)                                   | 0.153 |
| Age (in years)                          | -0.05 (-0.19-0.10)                                     | 0.522            | 0.06 (-0.14-0.24)                                      | 0.572        | 0.02 (-0.02-0.06)                                      | 0.886 | -2.11 (-4.87-0.65)                                    | 0.133 |
| High SEG (Ref)                          |                                                        |                  |                                                        |              |                                                        |       |                                                       |       |
| Low SEG                                 | 0.47 (-0.08-1.03)                                      | 0.092            | -0.13 (-0.78-0.53)                                     | 0.706        | -0.03 (-0.36-0.29)                                     | 0.839 | 3.32 (-8.52-15.15)                                    | 0.583 |
| White ethnicity (Ref)                   | -                                                      |                  | -                                                      |              | -                                                      |       | -                                                     |       |
| Non-White ethnicity                     | <b>-0.55 (-1.07- -0.04)</b>                            | <b>0.036</b>     | -0.12 (-0.75-0.51)                                     | 0.707        | 0.09 (-0.10-0.27)                                      | 0.368 | -4.28 (-9.80-1.24)                                    | 0.129 |
| <i>Guardians characteristics</i>        |                                                        |                  |                                                        |              |                                                        |       |                                                       |       |
| Maternal no/basic education (Ref)       | -                                                      |                  | -                                                      |              | -                                                      |       | -                                                     |       |
| Maternal secondary education            | 0.27 (-0.29-0.82)                                      | 0.341            | -0.10 (-0.78-0.58)                                     | 0.776        | -0.07 (-0.23-0.10)                                     | 0.418 | 4.95 (-2.19-12.08)                                    | 0.174 |
| Maternal university education           | 0.003 (-0.90-0.91)                                     | 0.995            | -0.34 (-1.38-0.69)                                     | 0.515        | 0.40 (-0.07-0.87)                                      | 0.094 | -                                                     | -     |
| Lower parental stigma (RIBS score)      | <b>0.12 (0.12-0.39)</b>                                | <b>0.020</b>     | 0.04 (-0.07-0.16)                                      | 0.465        | 0.002 (-0.06-0.06)                                     | 0.948 | 0.05 (-0.98-1.08)                                     | 0.922 |
| <i>Clinical characteristics</i>         |                                                        |                  |                                                        |              |                                                        |       |                                                       |       |
| No psychiatric diagnosis (Ref)          | -                                                      |                  | -                                                      |              | -                                                      |       | -                                                     |       |
| Incident psychiatric diagnosis          | -0.14 (-0.83-0.55)                                     | 0.693            | 0.15 (-0.71-1.00)                                      | 0.735        | 0.07 (-0.15-0.29)                                      | 0.548 | -23.61 (-54.48-7.27)                                  | 0.134 |
| Remittent psychiatric diagnosis         | 0.39 (-0.35-1.14)                                      | 0.298            | 0.09 (-0.85-1.04)                                      | 0.847        | -0.01 (-0.23-0.21)                                     | 0.928 | -2.17 (-7.42-3.07)                                    | 0.417 |
| Persistent psychiatric diagnosis        | -0.39 (-1.16-0.38)                                     | 0.315            | -0.42 (-1.40- 0.58)                                    | 0.412        | 0.14 (-0.11-0.39)                                      | 0.276 | -17.23 (-36.84-2.39)                                  | 0.085 |
| SDQ impact score                        | <b>0.25 (0.12-0.39)</b>                                | <b>&lt;0.001</b> | <b>0.20 (1.19-1.47)</b>                                | <b>0.019</b> | 0.01 (-0.02-0.04)                                      | 0.458 | -0.34 (-1.51-0.83)                                    | 0.569 |
| Test statistics <sup>a±</sup>           | AIC 16.97193<br>BIC -353.9633<br>R <sup>2</sup> = 0.22 |                  | AIC 16.24671<br>BIC -308.0671<br>R <sup>2</sup> = 0.15 |              | AIC 20.26365<br>BIC -24.59063<br>R <sup>2</sup> = 0.79 |       | AIC 15.83608<br>BIC 1.230216<br>R <sup>2</sup> = 0.90 |       |

346 Notes: Results in bold are significant (p<0.05). Models adjusted by city and method of interview.

347 <sup>a±</sup>Cameron & Windmeijer's R-squared, measure of goodness of fit for the class of exponential family regression models.

## 348 Discussion

349 We analysed data on mental health-related service use and associated costs among a  
350 prospective community cohort of young people in Brazil. We found that impact of mental health  
351 problems on daily life and parental stigma were the most consistent and robust drivers of mental  
352 health service use and associated costs, ~~above and beyond persistence of psychiatric disorder.~~

Formatted: Font color: Red

### 353 Drivers of mental-health service use costs

354 The association between disorder impact and mental health-related service use and costs  
355 that we found has been observed in previous research, providing further support that impact  
356 and impairment tend to be the strongest and most robust predictors of mental health service use  
357 [13,33] and costs [14]. Contrary to what we expected, we did not find an association between  
358 disorder persistence and costs. Our analyses instead found an that impact of the disorder on  
359 adolescent's life was the most important clinical predictor and that this was what seemed to  
360 drive service use rather than type or persistence of diagnosis. Nevertheless, it is important to  
361 consider that we have estimated annual costs, and these do not necessarily reflect the cumulative  
362 economic costs of persistent cases across childhood and adolescence.

363 A novel result we found was that lower parental stigma was associated with greater  
364 service use and higher costs. Our findings suggest that the ways in which parents perceive  
365 mental illness in adolescents may significantly influence help-seeking. We are aware of one  
366 study which showed that young people's likelihood of service use across health and education  
367 settings was greater among caregivers who reported less intended stigmatising behaviours [16]  
368 Another study indicated that low parental stigmatising attitudes toward mental disorders  
369 increased recognition of mental health problems in preadolescents (10-12 years) [43].

370 We did not find any study exploring the impact of parental stigmatising attitudes toward  
371 mental illness on child treatment costs. Other research ~~has~~ shown that parental stigma can

372 impede problem recognition and help-seeking [17,43]. Higher stigma amongst parents and  
373 caregivers may discourage or delay service access for their children [16], which may reduce the  
374 short-term public sector direct costs of treatment but be detrimental in the long run.

375 ~~Studies among adults suggest that stigma reduces help seeking (Clement et al., 2015),~~  
376 ~~and increases non-adherence to treatment and early withdrawal from services (Clement et al.,~~  
377 ~~2015; Kamaradova et al., 2016). As these results come from studies conducted with adult~~  
378 ~~populations with psychiatric conditions, we~~Future research ~~needs~~ to further explore the  
379 mechanisms through which parental stigma may be related to service/treatment selection and  
380 treatment adherence, in order to explain its impact on treatment costs. Moreover, as lower  
381 parental stigma may facilitate earlier service contact, it would be interesting to investigate if  
382 lower parental stigma may result in lower costs in the longer term.

383 Among sociodemographic variables, we found that low SEG predicted higher odds of  
384 educational service use. This may be related to the fact that young people living in deprived  
385 circumstances are more likely to be affected by developmental problems [44], and, therefore,  
386 are more likely to use special education services [11]. Although our study did not identify any  
387 differences in service use according to ethnicity, we found white ethnicity was associated with  
388 higher service use costs. This may reflect disparities in the type of mental health treatment  
389 offered or available to non-white children/adolescents. According to previous studies, non-  
390 white children/adolescents are less likely to receive adequate mental health treatment [45],  
391 including lower likelihood of psychopharmacological prescriptions [46], compared with white  
392 children/adolescents.

393

394 **The economic impact of adolescent mental health care by sectors**

Formatted: Font color: Red

395 We found that the health sector was clearly the main sector ~~providing mental~~ accessed  
396 by youth with mental disorders ~~health care for youth~~. Within the health sector, specialty mental  
397 health care was used more frequently and was more costly than primary care. In Brazil, access  
398 to CAPS does not require any referral. However, the number of CAPS ~~services~~ are limited, and  
399 they are focused on treatment of severe mental disorders [24]. The high costs incurred by the  
400 mental health sector for the treatment of psychiatric disorders in CAPS may be a result of both,  
401 the severity of patients consulting these services and because these services provide intensive  
402 outpatient treatments (reflected by the highest number of visits we found), which is costly  
403 compared with no-specialized services. It is important to highlight that ~~the~~ lack of youth-  
404 oriented primary care mental health ~~program~~ services in Brazil limits access to treatment  
405 when symptoms start to have an impact on adolescent functioning. This could explain why we  
406 found low frequency of mental health-related contacts with GP/ family doctors. -As a result,  
407 contact with specialist mental health services only happens when the disorder has significant  
408 negative impact on the lives of young people. In this sense, the organisation of a mental health  
409 network of care for adolescents, integrating primary care, social care, education, criminal justice  
410 and community youth-specialist services, according to the impact of cases, must be considered  
411 in Brazil to adequately plan and allocate scarce public budgets. [47].  
412

Formatted: Font color: Red

413 We found that mental-health related educational service use was less prevalent  
414 compared with health service use, nevertheless –as previous studies have shown– [11,14]  
415 educational service use was also associated with higher costs. In Brazil, while special education  
416 services are provided in regular schools, their use is restricted to students with disabilities and  
417 developmental disorders [48], so only adolescents with severe mental disorders are likely to be  
418 eligible.

419

## 420 **Limitations**

421 Our study has several limitations. First, the psychometric properties of the adapted  
422 version of the SACA have not been evaluated yet. Second, as we were not able to access  
423 administrative records, service use assessment was limited to guardians' reports. However, the  
424 concordance between parent report and records for service use on the parental version of the  
425 SACA is strong [36].

426 ~~Second~~Third, as most of the unit cost were specifically identified for the cities where  
427 the HRC is being conducted, São Paulo and Porto Alegre, they are not necessarily  
428 generalisable to the whole country.

429 ~~Fourth~~Third, due to the limited number of participants using each type of service, we  
430 were unable to compare factors related with use and associated costs of specific types of service.  
431 Furthermore, given our estimates come from observational cohort data, we are not able to  
432 establish causality.

## 433 **Conclusions**

434 Our findings suggest that the main drivers of health-related service use costs among  
435 adolescents in Brazil were impact of mental health problems, in addition to lower stigma toward  
436 people with mental illness among guardians and White ethnicity~~lower ethnic barriers~~White  
437 ethnicity. In the present study, only 22.4% of young people with a diagnosed mental disorder  
438 received any form of care. In addition to reducing inequality in service use among children, our  
439 findings also argue for lowering barriers to care, in particular addressing caregiver stigma.  
440 Furthermore, ~~B~~because lower use of services in adolescence may be associated with worse  
441 outcomes across the life course [47], it is needed to further explore measures to reduce

442 inequalities in service utilisation by ~~children~~ young people, even though this implies higher  
443 short-term costs.

Formatted: Font color: Red

444 ~~Impact of mental health problems on children's lives and guardian's~~ Guardian's lower  
445 stigmatising attitudes towards mental disorders may be crucial to support young people in  
446 accessing, engaging and maintaining ~~contacts~~ with mental health-related services. ~~In this sense,~~

447 ~~health and education policies need to better support guardians to access appropriate services in~~  
448 ~~their communities. In addition, various~~ Various anti-stigma interventions have ~~been~~

Formatted: Font color: Red

449 ~~effectives~~ demonstrated effectiveness for improving help-seeking [49], but few have been  
450 implemented in LMICs. Further studies are needed to design and implement anti-stigma

451 interventions in LMICs. ~~On the other hand,~~ In this sense, health and education policies need to

452 better support guardians to access appropriate and timely services in their communities, before

453 the symptoms have a significant impact on adolescent functioning. ~~In~~ Finally, We conclude that

Formatted: Font color: Red

454 the organisation of a culturally sensitive mental health network of care for adolescents,

455 integrating primary care, social care, education, criminal justice services and ~~community youth-~~

Formatted: Font color: Red

456 ~~specialist services~~ CAPS, ~~according to the impact of cases,~~ must be considered in Brazil to

457 adequately plan and allocate scarce public budgets (~~Knapp et al., 2016~~).

458 **Financial Support:** The research presented in this article was funded by the European Research  
459 Council under the European Union's Seventh Framework Programme (FP7/2007-2013)/ERC  
460 grant agreement no 337673, and supported by the National Institute of Developmental  
461 Psychiatry for Children and Adolescents, a science and technology institute funded by Conselho  
462 Nacional de Desenvolvimento Científico e Tecnológico (CNPq; National Council for Scientific  
463 and Technological Development; grant numbers 573974/2008-0 and 465550/2014-2) and  
464 Fundação de Amparo à Pesquisa do Estado de São Paulo (FAPESP grant number 2008/57896-  
465 8 and 2014/50917-0). SEL receives support from the UK Medical Research Council in relation

466 to the Mentalkit-Brazil project (MR/R022763/1) and the Economic and Social Research  
467 Council. CZ received a doctoral scholarship and research abroad scholarship by the Fundação  
468 de Amparo à Pesquisa do Estado de São Paulo (grant number 2018/05586-7 and 2019/08731-  
469 0). MSH was supported by the Newton International Fellowship (Ref: NIF\R1\181942),  
470 awarded by the Academy of Medical Sciences through the UK Government's Newton Fund  
471 Programme. The funding organisations had no role in the study design; collection, analysis or  
472 interpretation of data; in the writing of this article; or in the decision to submit the article for  
473 publication.

474 **Conflicts of interests:** All authors report no conflict of interest associated with this publication.  
475 Luis Augusto Rohde has received grant or research support from, served as a consultant to, and  
476 served on the speakers' bureau of Aché, Bial, Medice, Novartis/Sandoz, Pfizer/Upjohn, and  
477 Shire/Takeda in the last three years. The ADHD and Juvenile Bipolar Disorder Outpatient  
478 Programs chaired by Dr Rohde have received unrestricted educational and research support  
479 from the following pharmaceutical companies in the last three years: Novartis/Sandoz and  
480 Shire/Takeda. Dr Rohde has received authorship royalties from Oxford Press and ArtMed.  
481 None of these commercial relationships alter our adherence to PLOS ONE policies on sharing  
482 data and materials.

483 ~~The authors, CZ, WR, DK, DMD, MH, RR, GS, PP, EM, JM, and SEL have no conflicts of~~  
484 ~~interest to declare. LR has received grant or research support from, served as a consultant~~  
485 ~~to, and served on the speakers' bureau of Medice, Novartis/Sandoz and Shire/Takeda in~~  
486 ~~the last three years. The ADHD and Juvenile Bipolar Disorder Outpatient Programs~~  
487 ~~chaired by LR have received unrestricted educational and research support from the~~  
488 ~~following pharmaceutical companies in the last three years: Novartis/Sandoz and~~  
489 ~~Shire/Takeda. LR has received authorship royalties from Oxford Press and ArtMed and~~

Formatted: Font: Not Bold

Formatted: Font: Bold, Font color: Red

490 ~~travel grants from Shire to take part in the 2018 APA annual meeting and from Novartis~~  
491 ~~to take part of the 2017 AACAP annual meeting. RB: Pfizer, Torrent and Sanofi-Aventis.~~

492 **Access to data and Data sharing:** CZ have full access to all the data used in the study and  
493 takes responsibility for the integrity of the data and the accuracy of the data analysis. Data were  
494 provided by the Brazilian High-Risk Cohort study and are available upon request in the Open  
495 Science Framework public repository (<https://osf.io/ktz5h/>).

#### 496 REFERENCES

- 497 1. Polanczyk G V., Salum GA, Sugaya LS, Caye A, Rohde LA. Annual Research Review:  
498 A meta-analysis of the worldwide prevalence of mental disorders in children and  
499 adolescents. *J Child Psychol Psychiatry*. 2015;56: 345–365. doi:10.1111/jcpp.12381
- 500 2. Knapp M, King D, Healey A, Thomas C. Economic outcomes in adulthood and their  
501 associations with antisocial conduct, attention deficit and anxiety problems in  
502 childhood. *J Ment Health Policy Econ*. 2011;14: 137–47.
- 503 3. Kim-Cohen J, Caspi A, Moffitt TE, Harrington H, Milne BJ, Poulton R. Prior juvenile  
504 diagnoses in adults with mental disorder: developmental follow-back of a prospective-  
505 longitudinal cohort. *Arch Gen Psychiatry*. 2003;60: 709–17.  
506 doi:10.1001/archpsyc.60.7.709
- 507 4. Richards, M; Abbott R. Childhood mental health and life chances in post-war Britain.  
508 Insights from three national birth cohort studies. London: The Smith Institute,  
509 Sainsbury Centre for Mental Health & Unison; 2009.
- 510 5. Chen H, Cohen P, Kasen S, Johnson JG, Berenson K, Gordon K. Impact of Adolescent  
511 Mental Disorders and Physical Illnesses on Quality of Life 17 Years Later. *Arch*  
512 *Pediatr Adolesc Med*. 2006;160: 93. doi:10.1001/archpedi.160.1.93
- 513 6. Zechmeister I, Kilian R, McDaid D. Is it worth investing in mental health promotion  
514 and prevention of mental illness? A systematic review of the evidence from economic  
515 evaluations. *BMC Public Health*. 2008;8: 20. doi:10.1186/1471-2458-8-20
- 516 7. McCrone P, Knapp M, Fombonne E. The Maudsley long-term follow-up of child and  
517 adolescent depression. *Eur Child Adolesc Psychiatry*. 2005;14: 407–413.  
518 doi:10.1007/s00787-005-0491-6
- 519 8. Knapp M; Evans-Lacko S. Health Economics. 6th ed. In: Thapar A, Pine D, editors.  
520 Rutter's Child and Adolescent Psychiatry. 6th ed. Wiley-Blackwell; 2015. pp. 227–  
521 238.
- 522 9. Knapp M, Wong G. Economics and mental health: the current scenario. *World*  
523 *Psychiatry*. 2020;19: 3–14. doi:10.1002/wps.20692
- 524 10. Beecham J. Annual Research Review: Child and adolescent mental health



- 525 interventions: a review of progress in economic studies across different disorders. *J*  
526 *Child Psychol Psychiatry*. 2014;55: 714–732. doi:10.1111/jcpp.12216
- 527 11. Snell T, Knapp M, Healey A, Guglani S, Evans-Lacko S, Fernandez JL, et al.  
528 Economic impact of childhood psychiatric disorder on public sector services in Britain:  
529 Estimates from national survey data. *J Child Psychol Psychiatry*. 2013; 1–9.  
530 doi:10.1111/jcpp.12055
- 531 12. Funk M, Saraceno B, Lund C, Flisher AJ, Green A, Knapp M, et al. Planning and  
532 budgeting to deliver services for mental health. *Mental health policy and service*  
533 *guidance package*. Geneva: World Health Organization; 2003.
- 534 13. Evans-Lacko S, DosReis S, Kastelic E, Riley A. Mental Health Service Use Before and  
535 After Diagnosis of Early-Onset Bipolar Disorder. *J Behav Health Serv Res*. 2011;38:  
536 398–413. doi:10.1007/s11414-010-9225-8
- 537 14. Knapp M, Snell T, Healey A, Guglani S, Evans-Lacko S, Fernandez J-L, et al. How do  
538 child and adolescent mental health problems influence public sector costs?  
539 Interindividual variations in a nationally representative British sample. *J Child Psychol*  
540 *Psychiatry*. 2015;56: 667–676. doi:10.1111/jcpp.12327
- 541 15. Beecham J, Green J, Jacobs B, Dunn G. Cost variation in child and adolescent  
542 psychiatric inpatient treatment. *Eur Child Adolesc Psychiatry*. 2009;18: 535–542.  
543 doi:10.1007/s00787-009-0008-9
- 544 16. Gronholm PC, Ford T, Roberts RE, Thornicroft G, Laurens KR, Evans-Lacko S.  
545 Mental Health Service Use by Young People: The Role of Caregiver Characteristics.  
546 *PLoS One*. 2015;10: e0120004. doi:10.1371/journal.pone.0120004
- 547 17. Clement S, Schauman O, Graham T, Maggioni F, Evans-Lacko S, Bezborodovs N, et  
548 al. What is the impact of mental health-related stigma on help-seeking? A systematic  
549 review of quantitative and qualitative studies. *Psychol Med*. 2015;45: 11–27.  
550 doi:10.1017/S0033291714000129
- 551 18. Kamaradova D, Latalova K, Prasko J, Kubinek R, Vrbova K, Krnacova B, et al.  
552 Connection between self-stigma, adherence to treatment, and discontinuation of  
553 medication. *Patient Prefer Adherence*. 2016;10: 1289–1298. doi:10.2147/PPA.S99136
- 554 19. Horton S, Toledo ED la C, Mahon J, Santelli J, Waldfogel J. Identifying an Essential  
555 Package for Adolescent Health: Economic Analysis. *Child and Adolescent Health and*  
556 *Development*. Washington, D.C.: The World Bank; 2017. doi:10.1596/978-1-4648-  
557 0423-6\_ch26
- 558 20. Fatori D, Salum G, Itria A, Pan P, Alvarenga P, Rohde LA, et al. The economic impact  
559 of subthreshold and clinical childhood mental disorders. *J Ment Heal*. 2018;27: 588–  
560 594. doi:10.1080/09638237.2018.1466041
- 561 21. Paula CS, Bordin IAS, Mari JJ, Velasque L, Rohde LA, Coutinho ESF. The Mental  
562 Health Care Gap among Children and Adolescents: Data from an Epidemiological  
563 Survey from Four Brazilian Regions. *PLoS One*. 2014;9: e88241.  
564 doi:10.1371/journal.pone.0088241
- 565 22. Ministério da Educação. Notas Estatísticas Censo Escolar 2018. 2019 [cited 20 Sep

- 2019]. Available:  
[http://download.inep.gov.br/educacao\\_basica/censo\\_escolar/notas\\_estatisticas/2018/notas\\_estatisticas\\_censo\\_escolar\\_2018.pdf](http://download.inep.gov.br/educacao_basica/censo_escolar/notas_estatisticas/2018/notas_estatisticas_censo_escolar_2018.pdf)
23. Agência Nacional de Saúde Suplementar. Beneficiários de planos privados de saúde, por cobertura assistencial (Brasil – 2010-2020). 2020 [cited 15 Apr 2020]. Available: <http://www.ans.gov.br/index.php/aans/quem-somos/227-dados-gerais>
24. Paula CS, Lauridsen-Ribeiro E, Wissow L, Bordin I a. S, Evans-Lacko S. How to improve the mental health care of children and adolescents in Brazil: Actions needed in the public sector. *Rev Bras Psiquiatr.* 2012;34: 334–341. doi:10.1016/j.rbp.2012.04.001
25. Salum GA, Gadelha A, Pan PM, Moriyama TS, Graeff-Martins AS, Tamanaha AC, et al. High risk cohort study for psychiatric disorders in childhood: rationale, design, methods and preliminary results. *Int J Methods Psychiatr Res.* 2015;24: 58–73. doi:10.1002/mpr.1459
26. Weissman MM, Wickramaratne P, Adams P, Wolk S, Verdeli H, Olfson M. Brief Screening for Family Psychiatric History: The Family History Screen. *Arch Gen Psychiatry.* 2000;57: 675–682. doi:10-1001/pubs.Arch Gen Psychiatry-ISSN-0003-990x-57-7-yoa8214
27. Associação Brasileira de Empresas de Pesquisa. Critério de Classificação Econômica Brasil. 2018 [cited 15 Apr 2020]. Available: <http://www.abep.org/criterio-brasil>
28. Goodman R, Ford T, Richards H, Gatward R, Meltzer H. The Development and Well-Being Assessment: description and initial validation of an integrated assessment of child and adolescent psychopathology. *J Child Psychol Psychiatry.* 2000;41: 645–55.
29. Fleitlich-Bilyk B, Goodman R. Prevalence of Child and Adolescent Psychiatric Disorders in Southeast Brazil. *J Am Acad Child Adolesc Psychiatry.* 2004;43: 727–734. doi:10.1097/01.chi.0000120021.14101.ca
30. Sourander A, Helstelä L, Helenius H. Parent-adolescent agreement on emotional and behavioral problems. *Soc Psychiatry Psychiatr Epidemiol.* 1999;34: 657–663. doi:10.1007/s001270050189
31. Salbach-Andrae H, Klinkowski N, Lenz K, Lehmkuhl U. Agreement between youth-reported and parent-reported psychopathology in a referred sample. *Eur Child Adolesc Psychiatry.* 2009;18: 136–143. doi:10.1007/s00787-008-0710-z
32. Martel MM, Pan PM, Hoffmann MS, Gadelha A, do Rosário MC, Mari JJ, et al. A general psychopathology factor (P factor) in children: Structural model analysis and external validation through familial risk and child global executive function. *J Abnorm Psychol.* 2017;126: 137–148. doi:10.1037/abn0000205
33. Stringaris A, Goodman R. The Value of Measuring Impact Alongside Symptoms in Children and Adolescents: A Longitudinal Assessment in a Community Sample. *J Abnorm Child Psychol.* 2013;41: 1109–1120. doi:10.1007/s10802-013-9744-x
34. Evans-Lacko S, Rose D, Little K, Flach C, Rhydderch D, Henderson C, et al. Development and psychometric properties of the Reported and Intended Behaviour Scale (RIBS): a stigma-related behaviour measure. *Epidemiol Psychiatr Sci.* 2011;20:

- 607 263–271. doi:10.1017/S2045796011000308
- 608 35. Ribeiro WS, Gronholm PC, Silvestre de Paula C, Hoffmann MS, Rojas Vistorte AO,  
609 Zugman C, et al. Development and validation of the Brazilian Portuguese Version of  
610 the Reported and Intended Behaviour Scale (RIBS-BP). *Stigma Heal*. 2020;In press.  
611 doi:10.1037/sah0000224
- 612 36. Hoagwood K, Horwitz S, Stiffman A, Weisz J, Bean D, Rae D, et al. Concordance  
613 Between Parent Reports of Children’s Mental Health Services and Service Records:  
614 The Services Assessment for Children and Adolescents (SACA). *J Child Fam Stud*.  
615 2000;9: 315–331. doi:10.1023/A:1026492423273
- 616 37. Horwitz SM, Hoagwood K, Stiffman AR, Summerfeld T, Weisz JR, Costello EJ, et al.  
617 Reliability of the Services Assessment for Children and Adolescents. *Psychiatr Serv*.  
618 2001;52: 1088–1094.
- 619 38. Banco Central do Brasil. Conversor de moedas. 2018 [cited 10 Oct 2019]. Available:  
620 <https://www.bcb.gov.br/conversao>
- 621 39. Razzouk D. Accommodation and Health Costs of Deinstitutionalized People with  
622 Mental Illness Living in Residential Services in Brazil. *PharmacoEconomics - Open*.  
623 2019;3: 31–42. doi:10.1007/s41669-018-0078-z
- 624 40. Becker P, Razzouk D. Cost of a community mental health service: a retrospective study  
625 on a psychosocial care center for alcohol and drug users in São Paulo. *Sao Paulo Med J*.  
626 2018;136: 433–441. doi:10.1590/1516-3180.2018.0164310818
- 627 41. Banco Central do Brasil. Calculadora do Cidadão. Correção de valores. 2018 [cited 10  
628 Sep 2019]. Available: <https://www3.bcb.gov.br/CALCIDADAO>
- 629 42. Mihaylova B, Briggs A, O’Hagan A, Thompson SG. Review of statistical methods for  
630 analysing healthcare resources and costs. *Health Econ*. 2011;20: 897–916.  
631 doi:10.1002/hec.1653
- 632 43. Villatoro AP, DuPont-Reyes MJ, Phelan JC, Painter K, Link BG. Parental recognition  
633 of preadolescent mental health problems: Does stigma matter? *Soc Sci Med*. 2018;216:  
634 88–96. doi:10.1016/j.socscimed.2018.09.040
- 635 44. Blair C, Raver CC. Poverty, Stress, and Brain Development: New Directions for  
636 Prevention and Intervention. *Acad Pediatr*. 2016;16: S30–S36.  
637 doi:10.1016/j.acap.2016.01.010
- 638 45. Alegria M, Vallas M, Pumariega AJ. Racial and Ethnic Disparities in Pediatric Mental  
639 Health. *Child Adolesc Psychiatr Clin N Am*. 2010;19: 759–774.  
640 doi:10.1016/j.chc.2010.07.001
- 641 46. Leslie LK, Weckerly J, Landsverk J, Hough RL, Hurlburt MS, Wood PA.  
642 Racial/Ethnic Differences in the Use of Psychotropic Medication in High-Risk  
643 Children and Adolescents. *J Am Acad Child Adolesc Psychiatry*. 2003;42: 1433–1442.  
644 doi:10.1097/00004583-200312000-00010
- 645 47. Knapp M, Ardino V, Brimblecombe N, Evans-Lacko S, Lemmi V, King D, et al. Youth  
646 mental health: new economic evidence. London: Personal Social Services Research  
647 Unit; 2016.

- 648 48. Ministério da Educação. Decreto N° 7.611. 2011 [cited 20 Sep 2019]. Available:  
649 [http://www.planalto.gov.br/ccivil\\_03/\\_Ato2011-2014/2011/Decreto/D7611.htm#art11](http://www.planalto.gov.br/ccivil_03/_Ato2011-2014/2011/Decreto/D7611.htm#art11)
- 650 49. Thornicroft G, Mehta N, Clement S, Evans-Lacko S, Doherty M, Rose D, et al.  
651 Evidence for effective interventions to reduce mental-health-related stigma and  
652 discrimination. *Lancet*. 2016;387: 1123–1132. doi:10.1016/S0140-6736(15)00298-6

653

## 654 **Supporting information**

655 **S1 Fig. Flow chart of Brazilian High-Risk Cohort participants included in the mental-**  
656 **health related service use study.**

657 **S1 Table. Unit costs of health, educational, social care and criminal justice related**  
658 **services.**

659 **S2 Table. Bivariate analysis: Predictors of 12-month mental health service utilisation.**

660 **S3 Table. Bivariate analysis: Predictors of cost of mental health service use in the last 12**  
661 **months.**

662 **S4 Table. Logistic regression models: 12-month mental health service utilisation**  
663 **predicted by psychiatric diagnosis trajectories.**

664 **S5 Table. Logistic regression models: 12-month mental health service utilisation**  
665 **predicted by impact of behavioural and emotional difficulties on child' life.**

666 **S6 Table. Logistic regression models: 12-month mental health service utilisation**  
667 **predicted by parental stigma.**

668 **S7 Table. Generalised linear models: cost of 12-month mental health service utilization**  
669 **predicted by psychiatric diagnosis trajectories.**

670 **S8 Table. Generalised linear models: cost of 12-month mental health service utilisation**  
671 **predicted by impact of behavioural and emotional difficulties on child' life.**

672 **S9 Table. Generalised linear models: cost of 12-month mental health service utilisation**  
673 **predicted by parental stigma.**

674 **S10 Table. Generalised linear models: cost of 12-month mental health service utilisation**  
675 **predicted by broad diagnosis categories.**

January 27th, 2022

**Manuscript number PONE-D-21-10663****Manuscript Title: Utilisation and costs of mental health-related service use among adolescents**

We appreciate the careful revision of our manuscript and the comments of the reviewers. We are pleased to be invited to submit the revised version of our paper to PLOS ONE.

Please find attached both an unmarked version of the revised manuscript and one version with changes marked in red. Our point-by-point responses to the reviewers' comments (unquoted italics) and details of the changes we have performed to our revised manuscript are given below.

**Reviewer #1:**

**General Comment:** *Very relevant and interesting study. Well written paper, I found it pleasant to read. I would recommend some minor adjustments*

**Response:** We appreciate your positive feedback, the careful revision of our manuscript and your comments.

**Comment 1:** *Abstract- When only reading the abstract, the distinction between incident, remittent and persistent disorder in the Results section is a bit confusing. For the abstract, I would recommend rewriting this sentence for example: "Higher odds of service use were associated with having a diagnosed mental disorder (either incident, remittent or persistent), higher impact of symptoms etc."*

**Response:** Thank you for your comment. We have rewritten this sentence as follows: Higher odds of service use were associated with having a **diagnosed mental disorder (either incident [OR=2.49, 95%CI=1.44-4.30, p=0.001], remittent [OR=2.16, 95%CI=1.27-3.69, p=0.005] or persistent [OR=3.01, 95%CI=1.69-5.36, p<0.001]),** higher impact of symptoms..

**Comment 2:** *Introduction- This study focuses on the economic cost of mental disorders in young people (line 52). Therefore, it should be better introduced why, in addition to (mental) health services, also education, criminal justice and social care services were investigated.*

**Response:** We have edited the introduction as follows:

The high prevalence and potentially enduring nature of these impacts make addressing youth mental health conditions particularly important, but this is a challenge for public systems with limited resources (Knapp M; Evans-Lacko S, 2015). **Economic costs associated with youth mental health conditions involve a wide range of sectors including health, educational, social care, and criminal justice services [9,10]. This can**

represent a substantial cost to the public purse, yet it could also be considered a wise investment given the evidence that effective treatment can mitigate the impact of poor mental health (Knapp et al., 2011).

**Comment 3:** *Line 55: male gender is mostly not associated with higher use of mental health services. Please specify the association between these factors and specific services.*

**Response:** We appreciate your suggestion. We have edited this paragraph in the revised version of the manuscript:

Some studies from high-income countries suggest that lower socioeconomic status, as well as clinical features (illness severity and impact of disorders) are associated with use of health, special education, and social care services, while male gender and older age are associated with more criminal justice services contacts [11,13,14]. These sociodemographic and clinical characteristics are also associated with greater mental health-related treatment costs among young people [11,14,15]

**Comment 4:** *Methods: Data and participants. I understand that not all information about the Brazilian High-Risk Cohort was included in this paper. I would want to know, however, based on what information the children became part of this high risk cohort. Are they COPMI?*

**Response:** Thanks for the important point you raised. We have added information in the methods on the Brazilian High-Risk cohort sampling procedures as follows:

This study is nested within the Brazilian High-Risk Cohort (BHRC), which is an ongoing prospective longitudinal study that comprises a community sample and a high-risk sub-sample (a sample at increased risk of mental disorders) of young people from Sao Paulo and Porto Alegre, Brazil. A detailed description of the sample and procedures can be found elsewhere [25]. Briefly, during the registry day, 12,500 parents of young people aged 6 to 14 years attending 57 schools (22 in Porto Alegre and 35 in São Paulo) were invited to a screening of mental health disorders using the Family History Screen (FHS) [26]. A total of 8,012 families (9,937 eligible children, 45,394 family members) were interviewed. Based on the percentage of members in the family that screened positively for psychiatric disorders, an index of family load for each potential eligible child was computed. The final cohort comprised 2,511 young people; 957 were randomly selected, and 1,554 were a sub-sample at increased risk of mental disorders based on the FHS.

**Comment 5:** *Methods: Measures. Why only maternal educational level?*

*- Furthermore, this paragraph forms a clear description of appropriate measures.*

**Response:** As stated in the methods section, the socioeconomic group variable comprised head of household educational level in addition to other household socioeconomic indicators. As some research suggests that mothers educational level is particularly important for recognition and help-seeking, we also included this variable as a separate indicator. As the vast majority of caregiver respondents were mothers (in 93% of cases the biological mother [information included in the revised manuscript])

we focused on maternal education rather than estimating the educational level of other caregivers.

**Comment 6:** *Results. Very clear description and informative tables.*

**Response:** Thank you very much for your positive feedback.

**Comment 7:** *Discussion- Line 325: “We found that the health sector was clearly the main sector providing mental health care for youth.” That’s quite obvious. I would recommend rewriting this, for example: “We found that the health sector was clearly the main sector accessed by youth with mental disorders.”*

**Response:** Thank you very much for your suggestion. We rewrote this sentence as follows:

We found that the health sector was clearly the main sector **accessed by youth with mental disorders**.

**Comment 8:** *In the present study, only 20% of young people with a diagnosed mental disorder received any form of care. In addition to reducing inequality in service use among children, these data also argue for lowering barriers to care for young people in general. I would recommend stating this in the conclusion as well.*

**Response:** Thanks for your suggestion. We have edited the first paragraph of the conclusions as follows:

Our findings suggest that the main drivers of health-related service use costs among adolescents in Brazil were impact of mental health problems, in addition to lower stigma toward people with mental illness among guardians and **White ethnicity**. **In the present study, only 22.4% of young people with a diagnosed mental disorder received any form of care. In addition to reducing inequality in service use among children, our findings also argue for lowering barriers to care, in particular addressing caregiver stigma. Furthermore, because lower use of services in adolescence may be associated with worse outcomes across the life course [47], it is needed to further explore measures to reduce inequalities in service utilisation by young people, even though this implies higher short-term costs.**

**Comment 9:** *Line 329: “The lack of youth-oriented primary care mental health programmes”. Is this also the reason why GP’s/family doctors were less frequently visited?*

**Response:** We appreciate your comment, and we agree with your interpretation of this result. We have edited the referred sentence:

The lack of youth-oriented primary care mental health programmes limits access to treatment when symptoms start to have an impact on adolescent functioning. **This can explain why we found a low rate of mental health-related contacts with GP/ family doctors.** As a result, contact with specialist mental health services only happens when the disorder has significant negative impact on the lives of young people.

**Comment 10:** *Line 359-361: this reads like the impact of mental health problems on*

*children's lives should be increased because it would support help-seeking. Please, rewrite.*

**Response:** We have rewritten this paragraph:

Guardian's lower stigmatising attitudes towards mental disorders may be crucial to support young people in accessing, engaging and maintaining contact with mental health-related services. Various anti-stigma interventions have demonstrated effectiveness for improving help-seeking [49], but few have been implemented in LMICs. Further studies are needed to design and implement anti-stigma interventions in LMICs. **On the other hand**, health and education policies need to better support guardians to access appropriate **and timely** services in their communities, **before the symptoms have a significant impact on adolescent functioning**.

**Comment 11:** *Line 363: effectives should be effective*

**Response:** Thank you very much, we have corrected this error.

**Comment 12:** *In future research, it would be interesting to not only assess parental stigma but also stigma among the adolescents themselves.*

**Response:** We agree with you, and we are planning to evaluate the association between mental health-related service use and youth stigma towards mental illness in future cohort's assessments.

**Reviewer #2:**

**General comment:** *It's good to see more representative research from LMICs, trying to bridge the existing knowledge gap. This study's most significant plus point is that it looks at service use and service cost from multiple angles, shedding light on demographic, clinical and systemic factors that contribute to service use cost. However, this manuscript does require significant improvement in language and content. Here are my main suggestions:*

**Response:** We appreciate your positive opinion of our work, the careful revision of our manuscript and your valuable comments.

**Comment 1:** *The language of the manuscript can be crisper. Multiple places sentences look disjointed or elongated. The paragraphs are changed too frequently in some places, with each of these paragraphs containing only one or two sentences.*

**Response:** Thanks for your comment. We have revised and edited the language through the manuscript.

**Comment 2:** *Introduction: In line 57, please clarify whether by 'education services' authors mean remedial education services or some other kind of services?*

**Response:** Thanks for your comment. We have indicated 'special education' in the



revised version of the manuscript.

**Comment 3:** *Introduction: The lines 55-58 are difficult to follow: authors claim that certain demographic and clinical characteristics are associated with a greater likelihood of using certain services as per existing research. However, it's not clear how this connects with the assertion about young people in the same sentence.*

**Response:** Thanks for your comment. We have edited and separated these sentences: Some studies from high-income countries suggest that lower socioeconomic status, as well as clinical features (illness severity and impact of disorders) are associated with use of health, special education, and social care services, while male gender and older age are associated with more criminal justice service contacts [11,13,14]. These sociodemographic and clinical characteristics are also associated with greater mental health-related treatment costs among young people [11,14,15].

**Comment 4:** *Introduction: The importance of studying parental stigma needs to be built better.*

**Response:** We appreciate your suggestion. We have included the following changes: Families also play a central role in young people's contact with services. One study from the UK found that lower mental illness-related stigma among caregivers was associated with an increased likelihood of young people's mental health service use [16]. Stigmatising attitudes toward mental illness amongst parents may influence service contacts due to shame and fears of labelling their child's mental health condition [16]. There are clear links between stigma and reduced help-seeking [17], reduced adherence to treatment and early withdrawal from services [17,18]. However, little is known about/ how parental stigma could impact on young people service use and costs.

**Comment 5:** *Introduction: I'm not sure what is meant by 'beyond diagnosis', are authors implying the existing studies cover the cost of diagnosis only or for limited kinds of disorders. Some clarification here would be helpful.*

**Response:** Thanks for your suggestion. We have edited this sentence as follows: Additionally, little is known about how, in addition to the type of disorder, whether persistence of psychopathology from childhood to adolescence, disorders' impact on adolescent's daily life (i.e., functioning), and key barriers to care such as stigma, could influence costs.

**Comment 6:** *Introduction: The way lines 72-73 are written makes it sound like Brazil is a high-income country*

**Response:** We appreciate your comment. We have deleted 'Similar to most high income countries' in the revised version of the manuscript.

**Comment 7:** *Introduction: In line 88, it's unclear what characteristics the authors are referring to and whether the following hypothesis is related to a subset of these characteristics?*

**Response:** We have rewritten this sentence to clarify the characteristics under study:

Second, we examine how costs vary according to: **mental health trajectories, impact of the disorder on everyday life, and parent/guardian stigma towards mental illness.**

**Comment 8:** *Methods: In line 96, some information on how these children were classified as high risk will be helpful. The authors have said the details are somewhere else, but a brief description here will make it easier for the reader to understand the sample.*

**Response:** Thanks for your suggestion. As explained in response to Reviewer 1's comment 4, we have included a brief description of the Brazilian High-Risk Cohort sampling procedures.

**Comment 9:** *Methods: In line 99, it was slightly hard to follow study timelines. Was this study carried out after the first follow-up in 2014-2015 or as part of the follow-up?*

**Response:** We have tried to clarify this including the following information:

**Cohort participants were interviewed at baseline (aged 6-14 years, calendar year:2010-2011, n=2,511), and at first follow-up (N=2010, aged 9-17 years, calendar year 2014).** After **completing** the **BHRC first follow-up interview**, 1,881 parents/guardians were invited to respond to a **supplementary interview which included a comprehensive assessment of mental health related service use (calendar year: 2014-2015, young people participants aged 10-18 years).**

**Comment 10:** *Methods: The authors can use consistent terminology: children or young people. As of now, this has varied from one sentence to another.*

**Response:** Thanks for your comment. We have revised and edited the methods section in order to use consistently the term young people.

**Comment 11:** *The '-' in line 102 seems typo.*

**Response:** We appreciate your comment. We have deleted this typo.

**Comment 12:** *Methods: In lines 127-130, it's unclear why young people were not interviewed at baseline but were included during the 3-year follow-up?*

**Response:** This was because participants were younger at baseline and so we relied on parent's report, given limitations in funding and resources. Given that older adolescents are better at reporting internalising symptoms, both guardian and youth interviews were performed at 3-year follow-up. We included this explanation in the revised version of the manuscript:

At baseline, diagnostic assessment and interviews were performed with guardians only. **Previous literature has found that self-reports on internalising conditions during adolescence is higher compared with parental report. This can be explained because internalising problems, such as anxiety or depression, would be less observable by guardians, being advisable to consider both reports to reach a reliable evaluation of adolescent mental health [30,31]. For this reason, diagnostic assessment at 3-year follow-up was performed considering guardian reports and additional information from interviews with the young people about internalising conditions.**

**Comment 13:** *Methods: Do authors have any psychometric properties of the adapted version of Service Assessment for Children and Adolescents that can be reported in this publication?*

**Response:**

The parent-report SACA has been shown to be a valid measure of young people's service use ( $\kappa = 0.76$ ; [Hoagwood et al., 2000]) with test-retest reliability for past-year reports (ranging from 0.75 to 0.86; [Horwitz et al., 2001]). We have not assessed the psychometric properties of the adapted version of the Service Assessment for Children and Adolescents for Brazilian participants yet. We have included this limitation in the revised version of the manuscript.

**Comment 14:** *Results: In line 224, the authors refer to Table 1. However, without any commentary on the significance of data in this table, the authors jump to a new set of findings. All this makes it slightly hard to follow what is being presented.*

**Response:** We appreciated your comment. We have edited this paragraph:

Table 1 describes sociodemographic and clinical characteristics of participants. The sample comprised 1,400 adolescents with a mean age of 14 years (s.d.=1.98). The majority were white males from low SEG, and only 10% of mothers had university education. 23.3% (n= 326) of adolescents had a psychiatric disorder in the previous 12 months, of which 177 (54.3%) were incident and 149 (45.7%) persistent cases since baseline. 213 (15.2%) participants had remitted from a baseline psychiatric diagnosis. Participants with externalising disorders were more likely to have persistent trajectories (RR=2.19, 95%CI=1.38-3.48,  $p < 0.001$ ). Participants categorised as persistent also reported greater disorder impact ( $\beta = 2.34$ , 95%CI=2.11-2.58,  $p < 0.001$ ). 22.4% of those who presented with a psychiatric disorder reported using some type of service for their mental health in the previous twelve months. The proportion of service use among those who presented a persistent psychiatric condition was 27%. Table 1 also describes the mean costs of mental health-related service use in the past year, by psychiatric trajectory (from no diagnosis to persistent psychiatric diagnosis). Bivariate analyses showed a non-significant association between psychiatric trajectory and mean annual costs.

**Comment 15:** *The 12-month service use and service use cost means are presented in Tables 1 and 2. Repeating the same findings across two tables should be avoided*

**Response:** We have deleted the last line of Table 2 (overall services cost).

**Comment 16:** *The paragraph on page 12 lacks a description of the cost associated with each service? For e.g., although CAPS is not a highly prevalent service, the associated cost makes for a lion contribution to the public purse. This needs to be presented and discussed.*

**Response:** Thank you very much for your suggestion. We edited this paragraph as follows:

Utilisation of mental health services in the previous 12 months and associated cost by type of service are presented in Table 2. Overall, 10.0% of the sample (n=143)

used some sort of health, education, criminal justice or social care service for mental health problems. **Disaggregating by sectors, the health sector had highest proportion of service users (9%), while the education and social care and criminal justice sectors were less frequently contacted with a 1.8% and 1.3% of users, respectively.** Outpatient mental health services, most notably psychologists and psychiatrists in settings other than community mental health clinics, were the most frequently used services/professionals. **Inpatient services and general health services** such as GP/family doctor, paediatrician and emergency department, were less frequently used.

**In the education sector, school assistant was the most type of service used by young people, while guardianship council was the most frequently social care service contacted. The total cost of 12-month mental health-related service use for the public purse was 70,110.23 USD. The sector that presented higher total annual cost was the health sector, followed by the education and finally the social care and criminal justice sectors. The services that generated the greatest total costs for the health sector were psychologist (11,339.64 USD) and CAPS (9,628.01 USD). Among those who used services, the average annual cost of service use amounted to 527.14 USD (SD= 908.10 USD, range=8.77- 7,605.58 USD, median=221.10 USD, interquartile range=545.28) per user. Individuals using CAPS (specialty mental health) services (1.1% of the sample) had the highest mean number of visits during the previous year and the highest associated costs among health services. The second highest mean costs in the health sector were related to hospitalizations in psychiatric hospitals and alcohol and drugs clinics, while the lowest mean costs were attributed to emergency department, paediatrician, outpatient alcohol and drugs and GP/family doctor contacts. Although only 0.1% of individuals used shelters, this type of social service had the highest associated mean cost. Education services were used by 1.8% of individuals and these services had the second highest associated mean costs.**

**Comment 17:** *Discussion: In line 288, the use of the terms 'above and beyond' doesn't convey much. To the best of my knowledge, the current analysis nowhere helps to reach this conclusion of above and beyond. I am requesting authors to look at terminology closely.*

**Response:** Thanks for your suggestion. We have removed this language. We found that impact of mental health problems on daily life and parental stigma were the most consistent and robust drivers of mental health service use and associated costs..

**Comment 18:** *Discussion: Lines 301-312 can be streamlined and better organised.*

**Response:** We have edited the cited lines as follows:

We did not find any study exploring the impact of parental stigmatising attitudes toward mental illness on child treatment costs. Other research has shown that parental stigma can impede problem recognition and help-seeking [17,43]. Higher stigma amongst parents and caregivers may discourage or delay service access for their children [16], which may reduce the short-term public sector direct costs of treatment but be detrimental in the long run. **Future research** needs to further explore the mechanisms through which parental stigma may be related to service/treatment

selection and treatment adherence, in order to explain its impact on treatment costs. Moreover, as lower parental stigma may facilitate earlier service contact, it would be interesting to investigate if lower parental stigma may result in lower costs in the longer term.

**Comment 19:** *Discussion: Line 327: The number of CAPS users was less, but the number of visits and costs for those who used it were very high. These were not reflected in the discussion, nor were its implication for the restructuring health system.*

**Response:** We appreciate your comment. We have edited the discussion as suggested: In Brazil, access to CAPS does not require any referral. However, the number of CAPS services are limited, and they are focused on treatment of severe mental disorders [24]. **The high costs incurred by the mental health sector for the treatment of psychiatric disorders in CAPS may be a result of both, the severity of patients consulting these services and because these services provide intensive outpatient treatments (reflected by the highest number of visits we found), which is costly compared with no-specialized services. It is important to highlight that the lack of youth-oriented primary care mental health services in Brazil which limits access to treatment. This could explain why we found low frequency of mental health-related contacts with GP/ family doctors.** As a result, contact with specialist mental health services only happens when the disorder has significant negative impact on the lives of young people. (Moved from the conclusion as suggested in your last comment). **In this sense, the organisation of a mental health network of care for adolescents, integrating primary care, social care, education, criminal justice and community youth-specialist services, according to the impact of cases, must be considered in Brazil to adequately plan and allocate scarce public budgets [47].**

**Comment 20:** *Discussion: The hypothesis stated that researchers were interested in examining the impact of persistence of psychiatric disorders from childhood to adolescence on service costs; however, the discussion did not give much attention to this part.*

**Response:** Thanks for rising this important comment. We have included the following paragraph:

**Contrary to what we expected, we did not find an association between disorder persistence and costs. Our analyses instead found that impact of the disorder on adolescent's life was the most important clinical predictor and that this was what seemed to drive service use rather than type or persistence of diagnosis. Nevertheless, it is important to consider that we have estimated annual costs, and these do not necessarily reflect the cumulative economic costs of persistent cases across childhood and adolescence.**

**Comment 21:** *Conclusion: Some of the text in the last paragraph of the conclusion, i.e. those referring to implications, can be moved to discussion and expanded further. I'm not able to comment on cost analysis as this is not my area of expertise.*

**Response:** Thanks for your suggestions, we have moved some conclusions to the discussion as explained in response to your Comment #20.
